# Supplementary material for: A regioselective synthesis of 3,4-diaryl-1H-pyrazoles through a 1,3-dipolar cycloaddition of tosylhydrazones and nitroalkenes
Source: Royal Society of Chemistry journal article supplement (doi:10.1039/d3ob00753g), 2023-01-01
Supplement: d3ob00753g1.pdf [file d3ob00753g1.pdf]

# Supporting Information

## **A regioselective synthesis of 3,4-diaryl-1*H*-pyrazoles through a 1,3-dipolar cycloaddition of tosylhydrazones and nitroalkenes.**

Carlos D. García-Mejía, Eduardo Hernández-Vázquez\*, Javier Alejandro Ibarra-Hernández, Atl Tarbuck-Valle, María T. Ramírez-Apán.

*Instituto de Química, Universidad Nacional Autónoma de México, Circuito Exterior, Ciudad Universitaria, Coyoacán 04510, CDMX, México.*

\*Corresponding author: ehervaz@iquimica.unam.mx

---

---

### **Table of Contents**

|                                                                                      |     |
|--------------------------------------------------------------------------------------|-----|
| <sup>1</sup> H-NMR and <sup>13</sup> C-NMR and HRMS spectra of the nitroalkenes..... | S2  |
| <sup>1</sup> H-NMR, <sup>13</sup> C-NMR, and HRMS spectra of the pyrazoles.....      | S23 |
| Comparative TLC of the methodologies .....                                           | S74 |
| X-Ray Data.....                                                                      | S76 |
| Coordinates of optimized geometries.....                                             | S79 |
| Intrinsic Reaction Coordinate (IRC) of Transition States .....                       | S87 |
| Results of Cytotoxicity screening.....                                               | S89 |

$^1\text{H}$ -NMR and  $^{13}\text{C}$ -NMR and HRMS spectra of the  
nitroalkenes.

---

---

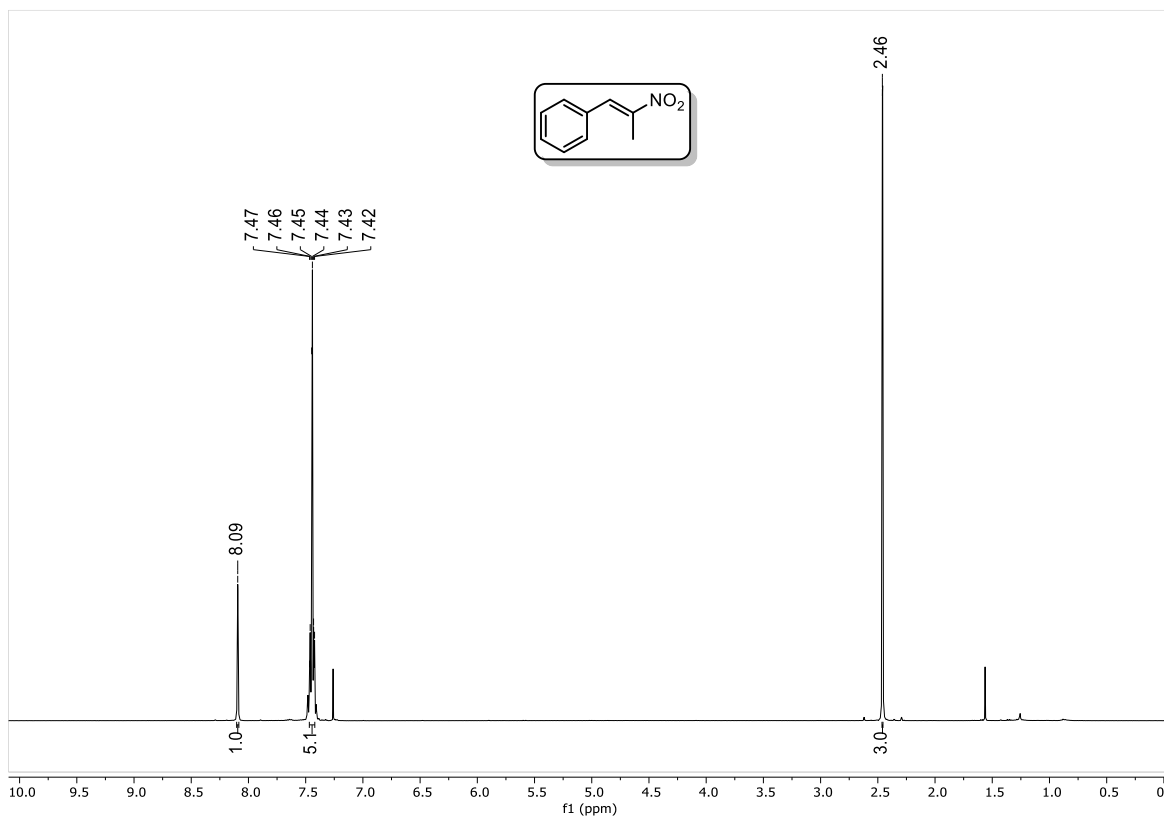

Spectrum 1. <sup>1</sup>H-NMR of 6a.

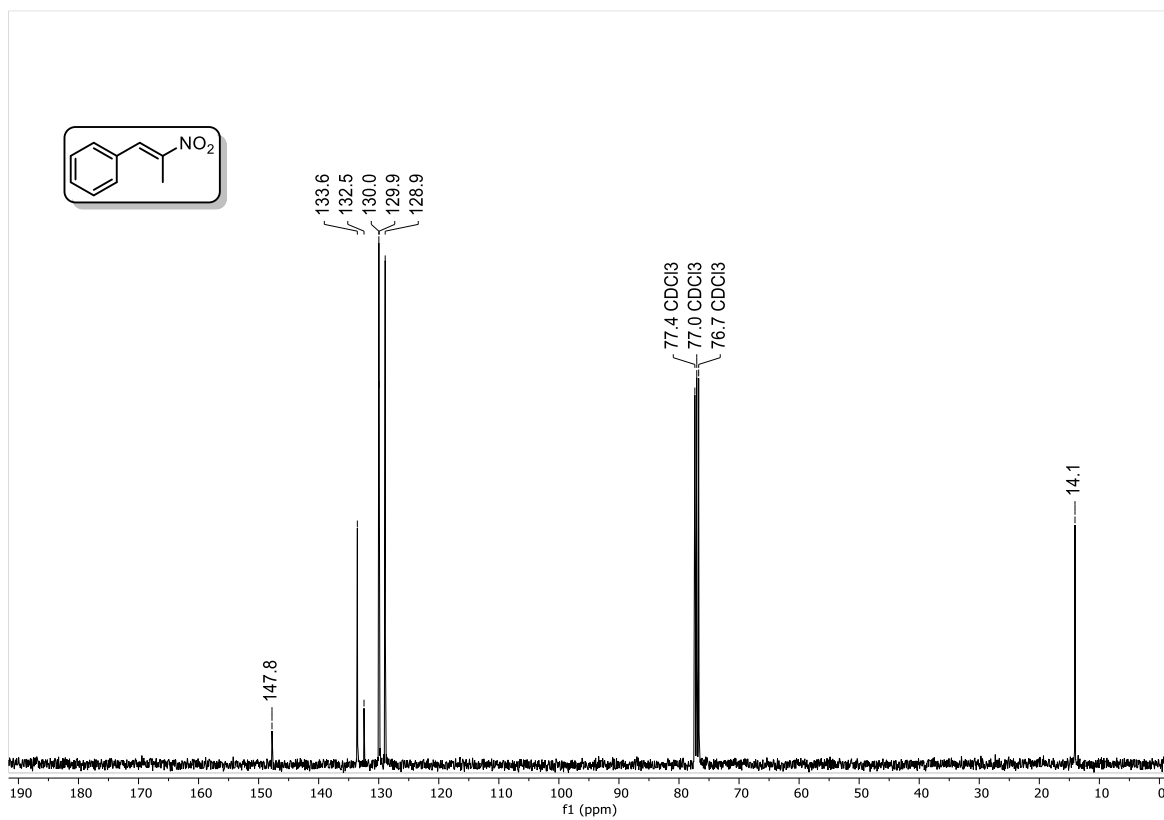

Spectrum 2. <sup>13</sup>C-NMR of 6a.

Description:  
Ionization Mode:ESI+  
History:Determine m/z[Peak Detect[Centroid,30,Area];Correct Base[];Smooth[5]];Correct Base[5.0%];Average(MS[...

Mass Calibration data:CaI\_PEG\_600  
Created:6/2/2023 10:48:32 AM  
Created by:

Charge number:1  
Tolerance:50.00(ppm), 5.00 .. 15.00(mmu)  
Element:<sup>12</sup>C:0 .. 9, <sup>1</sup>H:0 .. 50, <sup>35</sup>Cl:0 .. 1, <sup>14</sup>N:0 .. 1, <sup>16</sup>O:0 .. 2, <sup>32</sup>S:0 .. 0

Unsaturation Number:-1.0 .. 60.0 (Fraction:Both)

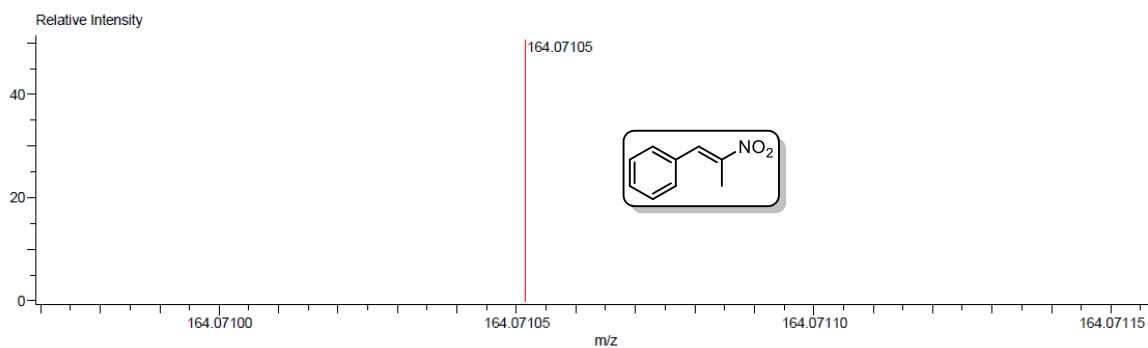

| Mass      | Intensity | Calc. Mass | Mass Difference (mmu) | Mass Difference (ppm) | Possible Formula                                                                                                    | Unsaturation Number |
|-----------|-----------|------------|-----------------------|-----------------------|---------------------------------------------------------------------------------------------------------------------|---------------------|
| 164.07105 | 11180.34  | 164.07115  | -0.10                 | -0.62                 | <sup>12</sup> C <sub>9</sub> <sup>1</sup> H <sub>10</sub> <sup>14</sup> N <sub>1</sub> <sup>16</sup> O <sub>2</sub> | 5.5                 |

Spectrum 3. HRMS of 6a.

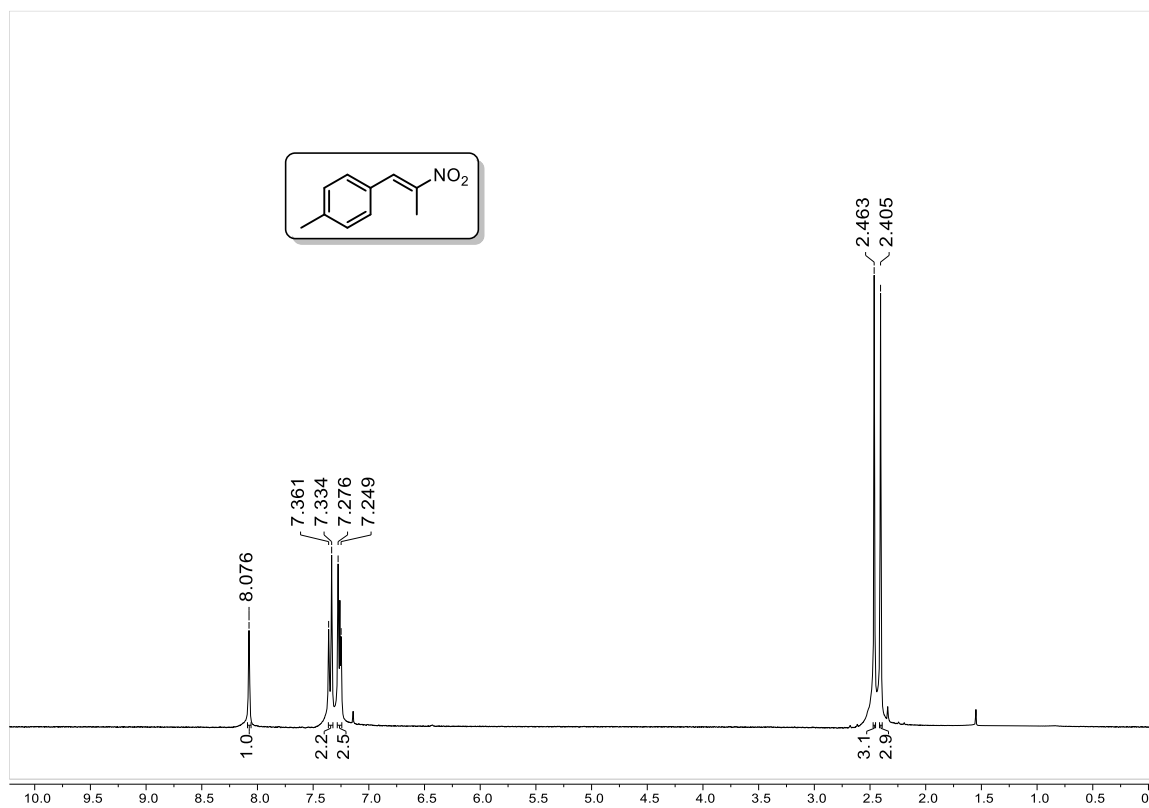

Spectrum 4. <sup>1</sup>H-NMR of 6b.

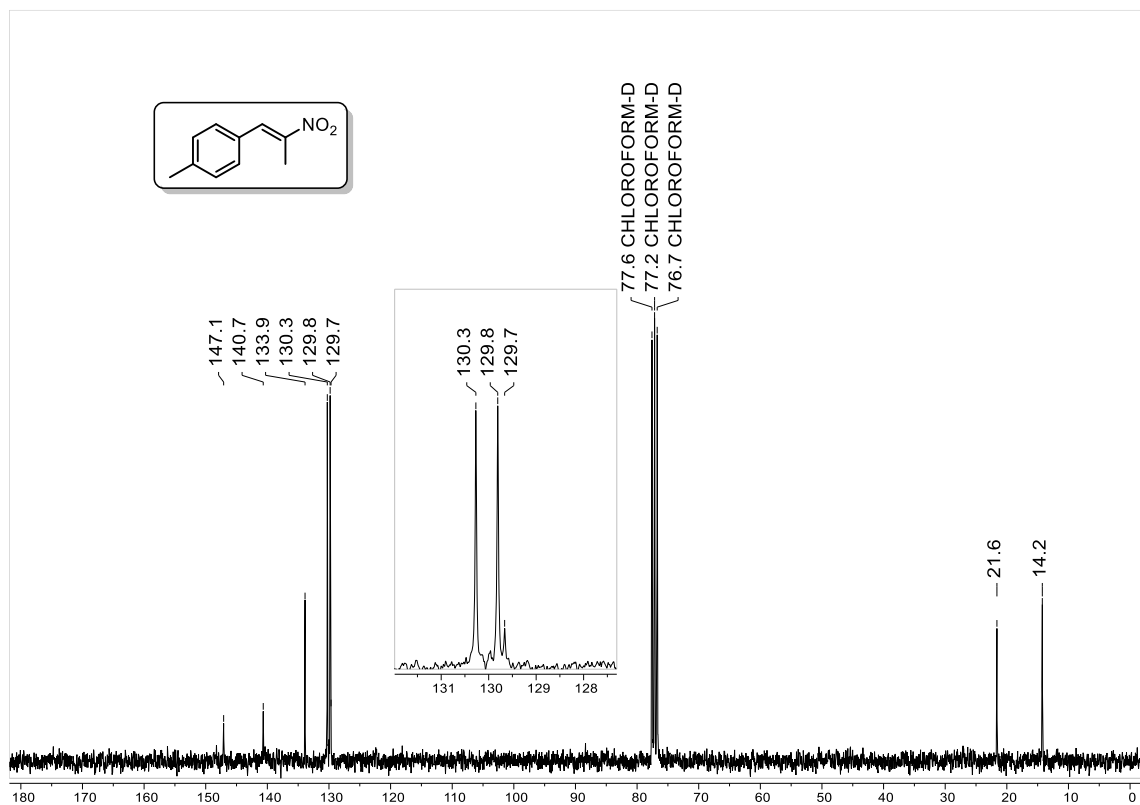

**Spectrum 5. <sup>13</sup>C-NMR of 6b.**

Description: Ionization Mode: ESI+  
 History: Determine m/z [Peak Detect [Centroid, 30, Area]; Correct Base[]; Smooth [5]]; Correct Base [5.0%]; Average (MS [...])

Mass Calibration data: Cal\_PEG\_600  
 Created: 6/1/2023 10:08:27 AM  
 Created by:

Charge number: 1  
 Element: <sup>12</sup>C: 0 .. 22, <sup>1</sup>H: 0 .. 28, <sup>35</sup>Cl: 0 .. 0, <sup>19</sup>F: 0 .. 0, <sup>14</sup>N: 0 .. 1, <sup>16</sup>O: 0 .. 2, <sup>32</sup>S: 0 .. 0

Tolerance: 5.00 (ppm), 5.00 .. 15.00 (mmu)

Unsaturation Number: -1.0 .. 60.0 (Fraction: Both)

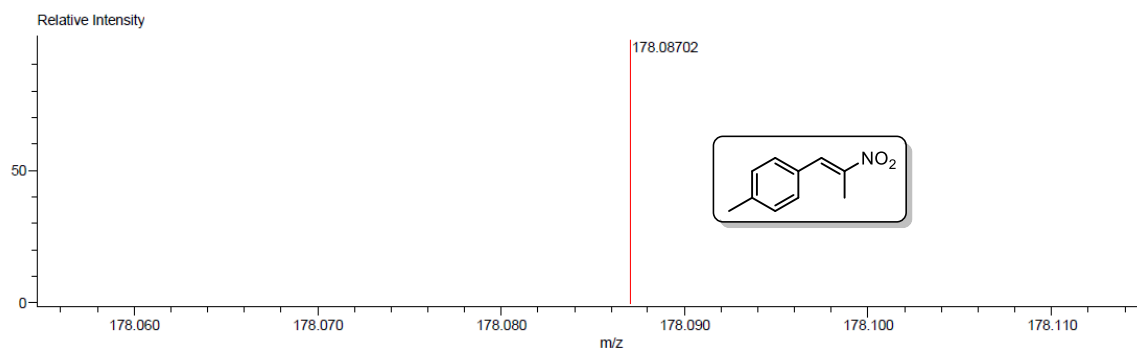

| Mass      | Intensity | Calc. Mass | Mass Difference (mmu) | Mass Difference (ppm) | Possible Formula                                                                                                     | Unsaturation Number |
|-----------|-----------|------------|-----------------------|-----------------------|----------------------------------------------------------------------------------------------------------------------|---------------------|
| 178.08702 | 20008.16  | 178.08680  | 0.22                  | 1.23                  | <sup>12</sup> C <sub>10</sub> <sup>1</sup> H <sub>12</sub> <sup>14</sup> N <sub>1</sub> <sup>16</sup> O <sub>2</sub> | 5.5                 |

**Spectrum 6. HRMS of 6b.**

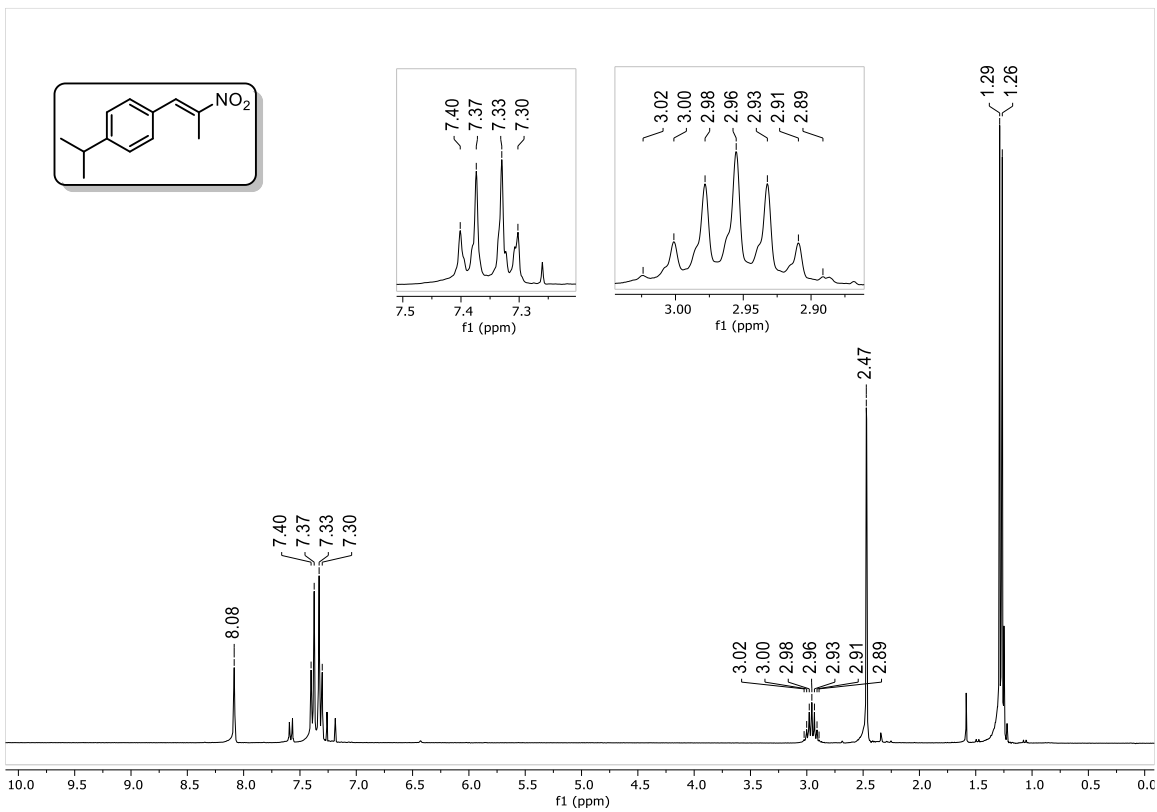

**Spectrum 7.** <sup>1</sup>H-NMR of 6c.

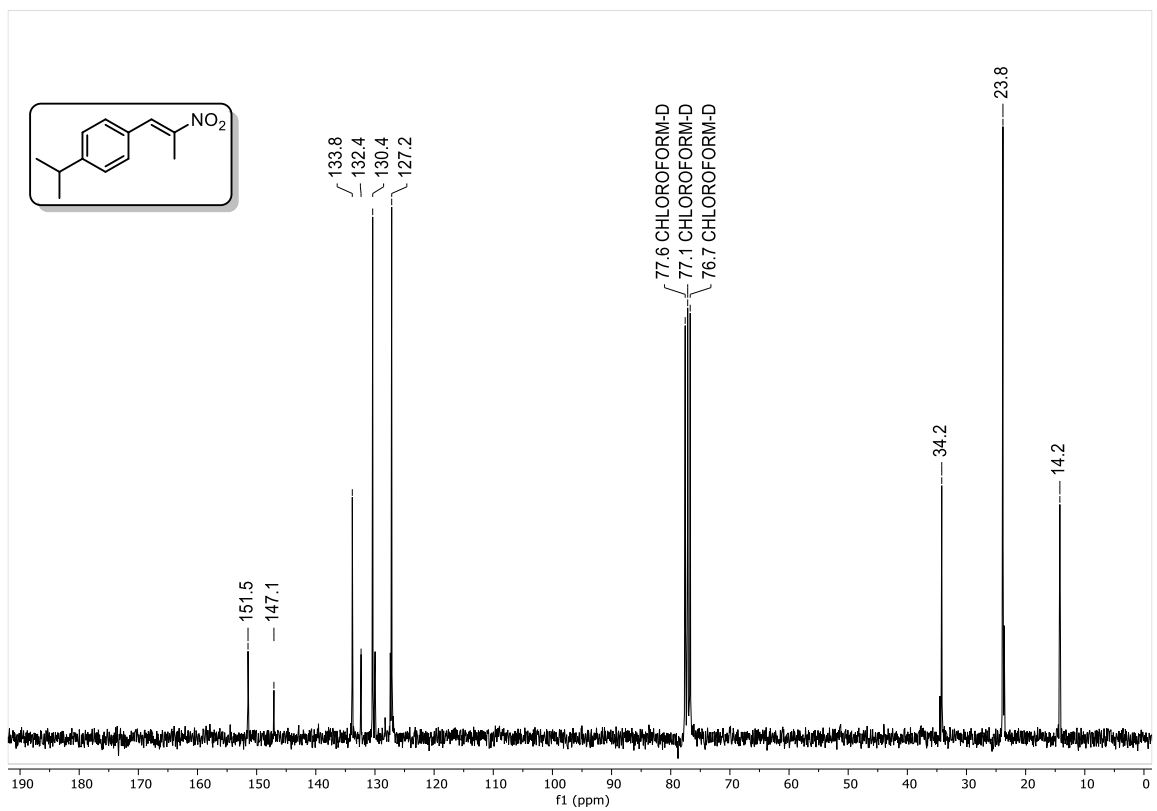

**Spectrum 8.** <sup>13</sup>C-NMR of 6c.

Description:  
 Ionization Mode:ESI+  
 History:Determine m/z[Peak Detect[Centroid,30,Area];Correct Base[];Smooth[5]];Correct Base[5.0%];Average(MS[...

Mass Calibration data:Cal\_PEG\_600  
 Created:6/1/2023 10:14:38 AM  
 Created by:

Charge number:1  
 Tolerance:5.00(ppm), 5.00 .. 15.00(mmu)  
 Element:<sup>12</sup>C:0 .. 22, <sup>1</sup>H:0 .. 28, <sup>35</sup>Cl:0 .. 0, <sup>19</sup>F:0 .. 0, <sup>14</sup>N:0 .. 1, <sup>16</sup>O:0 .. 2, <sup>32</sup>S:0 .. 0

Unsaturation Number:-1.0 .. 60.0 (Fraction:Both)

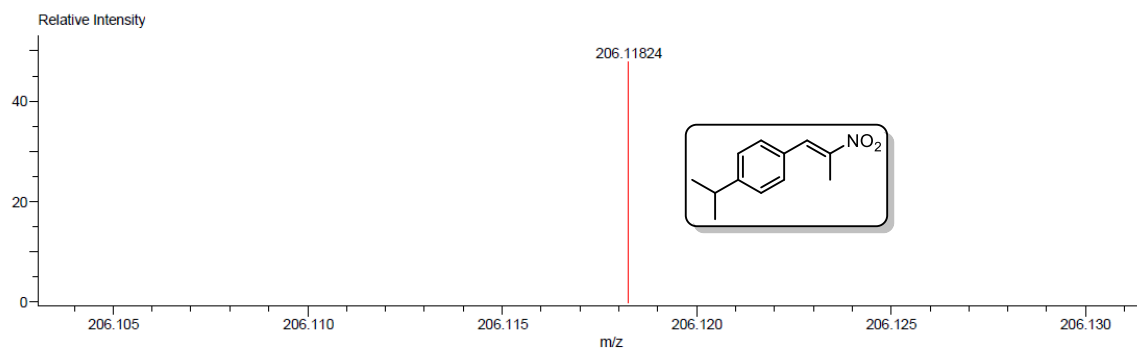

| Mass      | Intensity | Calc. Mass | Mass Difference (mmu) | Mass Difference (ppm) | Possible Formula                                                                                                     | Unsaturation Number |
|-----------|-----------|------------|-----------------------|-----------------------|----------------------------------------------------------------------------------------------------------------------|---------------------|
| 206.11824 | 3006.77   | 206.11810  | 0.14                  | 0.68                  | <sup>12</sup> C <sub>12</sub> <sup>1</sup> H <sub>16</sub> <sup>14</sup> N <sub>1</sub> <sup>16</sup> O <sub>2</sub> | 5.5                 |

Spectrum 9. HRMS of 6c.

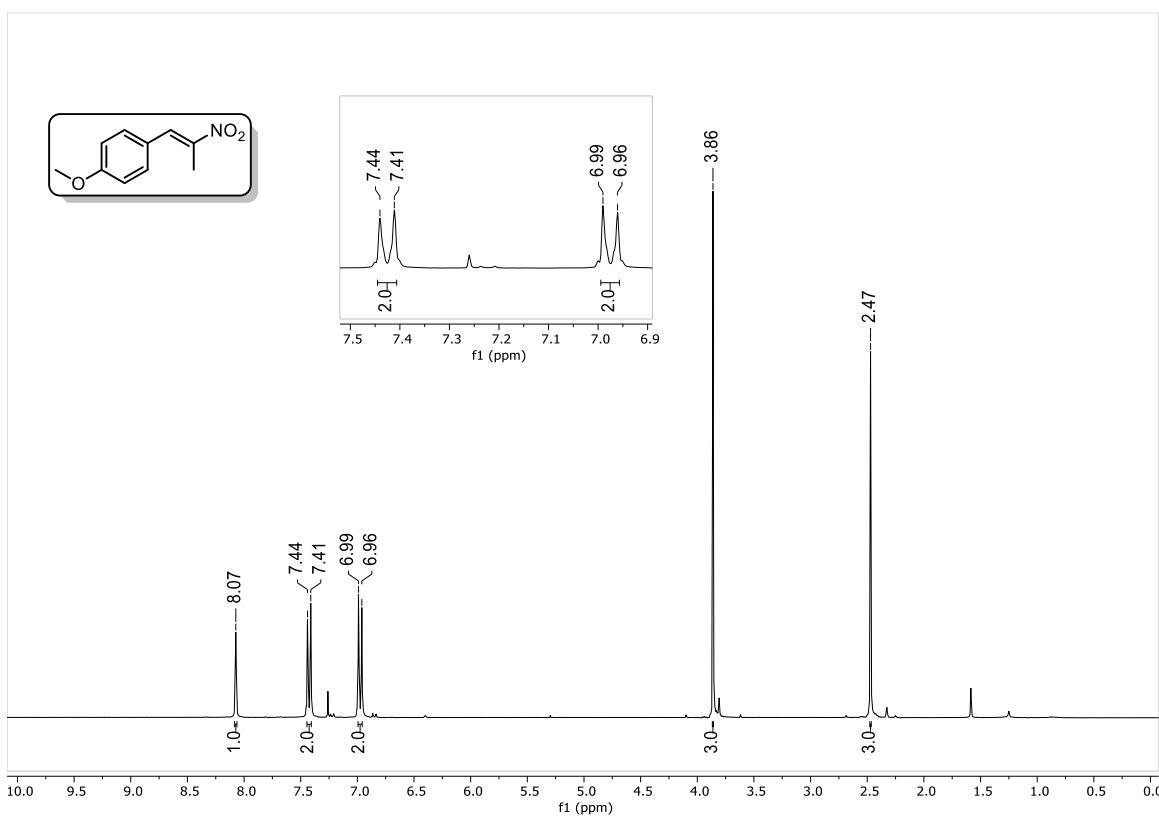

Spectrum 10. <sup>1</sup>H-NMR of 6d.

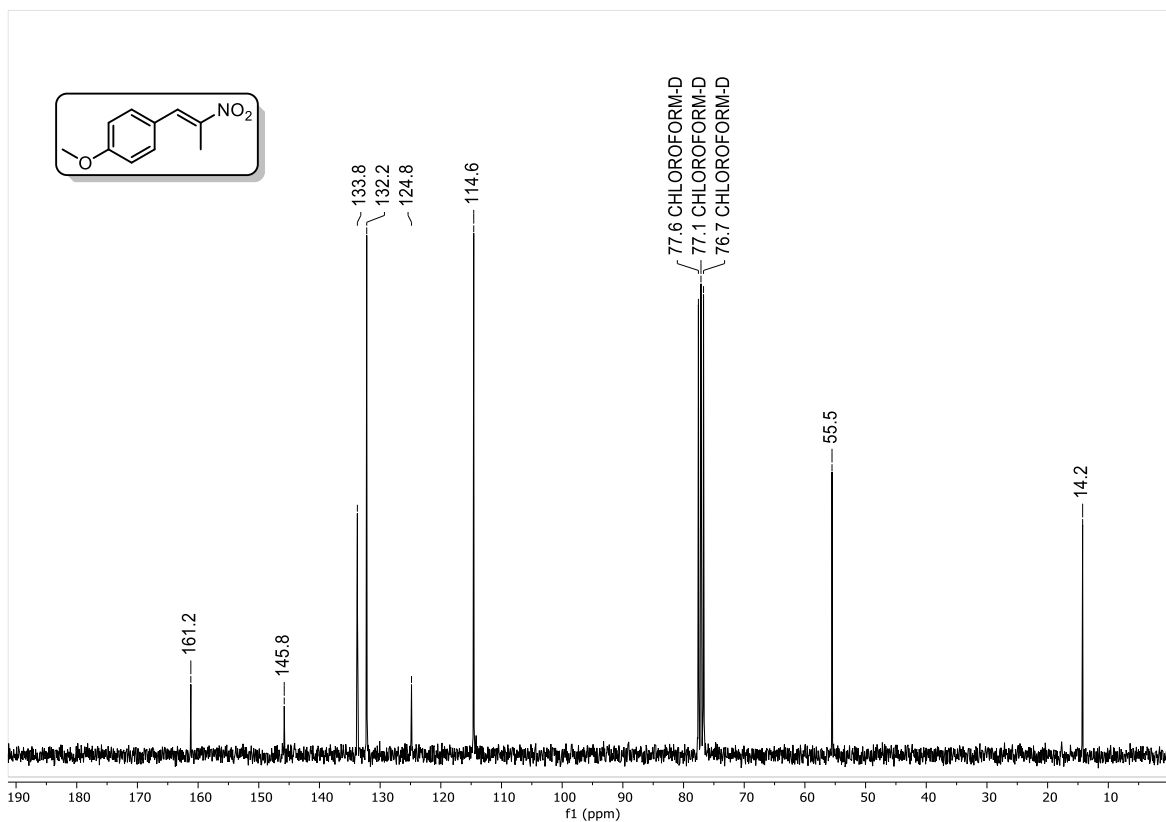

**Spectrum 11.** <sup>13</sup>C-NMR of 6d.

Description:  
 Ionization Mode:ESI+  
 History:Determine m/z[Peak Detect[Centroid,30,Area];Correct Base[];Smooth[5]];Correct Base[5.0%];Average[MS[...

Mass Calibration data:Cal\_PEG\_600  
 Created:6/1/2023 10:28:36 AM  
 Created by:

Charge number:1  
 Element:<sup>12</sup>C:0 .. 10, <sup>1</sup>H:0 .. 28, <sup>35</sup>Cl:0 .. 0, <sup>19</sup>F:0 .. 0, <sup>14</sup>N:0 .. 1, <sup>16</sup>O:0 .. 3, <sup>32</sup>S:0 .. 0  
 Tolerance:5.00(ppm), 5.00 .. 15.00(mmu)

Unsaturation Number:-1.0 .. 60.0 (Fraction:Both)

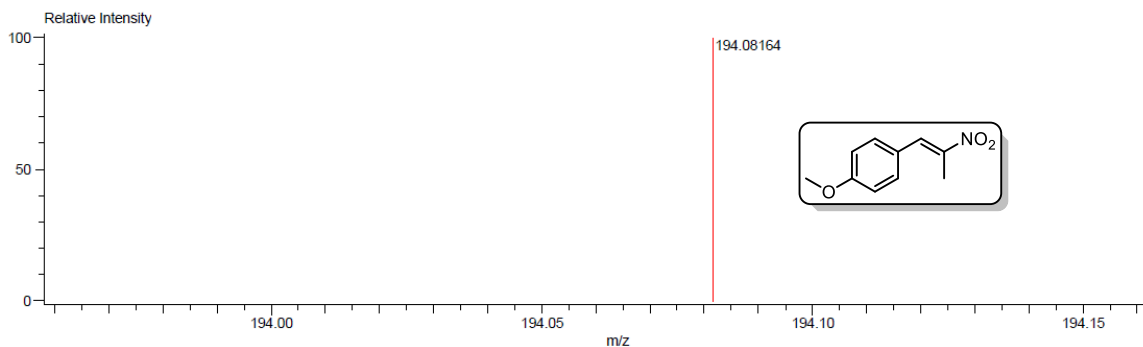

| Mass      | Intensity | Calc. Mass | Mass Difference (mmu) | Mass Difference (ppm) | Possible Formula                                                                                                     | Unsaturation Number |
|-----------|-----------|------------|-----------------------|-----------------------|----------------------------------------------------------------------------------------------------------------------|---------------------|
| 194.08164 | 6888.90   | 194.08172  | -0.07                 | -0.38                 | <sup>12</sup> C <sub>10</sub> <sup>1</sup> H <sub>12</sub> <sup>14</sup> N <sub>1</sub> <sup>16</sup> O <sub>3</sub> | 5.5                 |

**Spectrum 12.** HRMS of 6d.



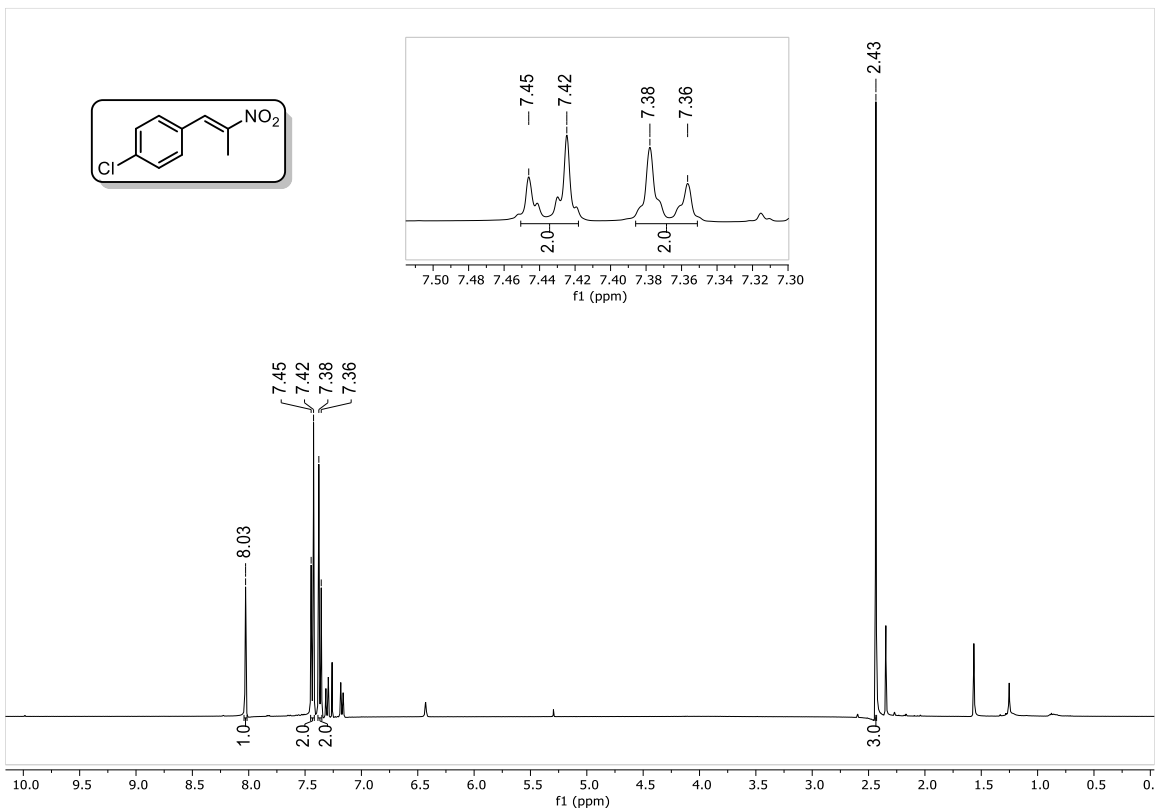

**Spectrum 13.**  $^1\text{H-NMR}$  of 6e.

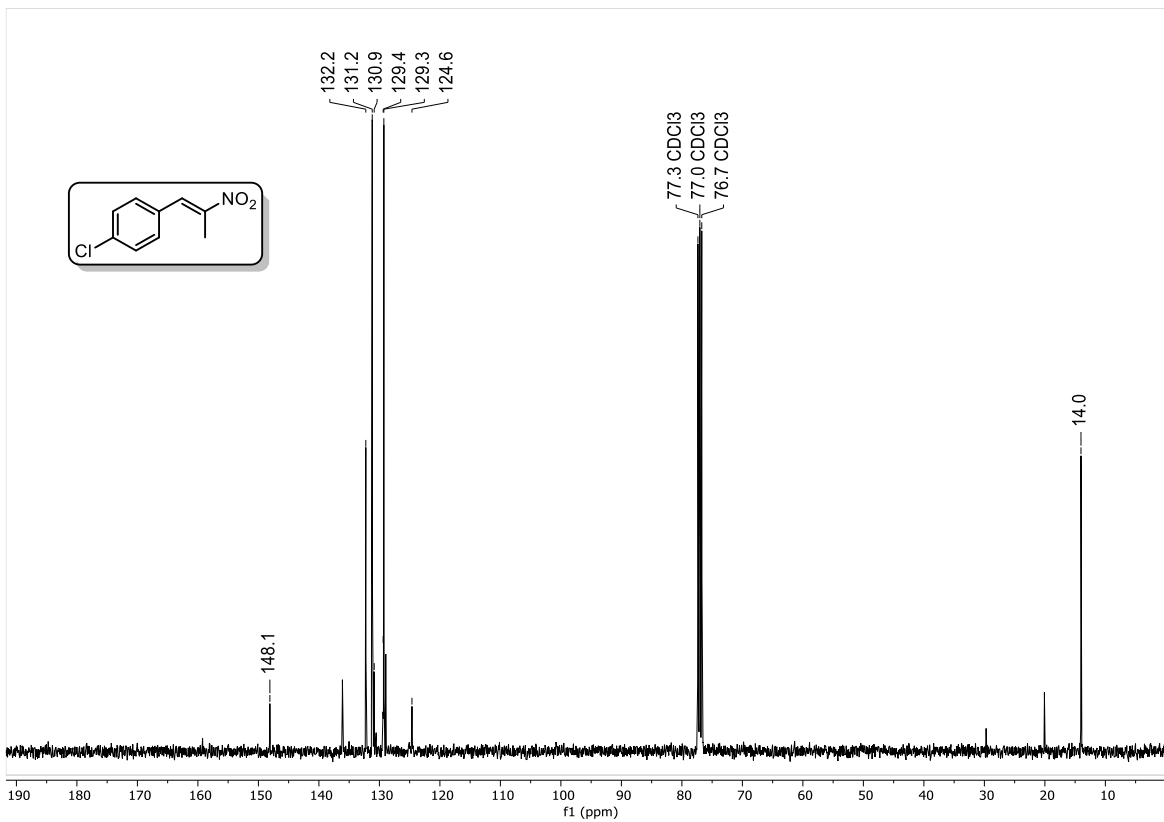

**Spectrum 14.**  $^{13}\text{C-NMR}$  of 6e.

Description:  
 Ionization Mode: ESI+  
 History: Determine m/z [Peak Detect [Centroid, 30, Area]; Correct Base[]; Smooth [5]]; Correct Base [5.0%]; Average (MS[...

Mass Calibration data: Cal\_PEG\_600  
 Created: 6/2/2023 9:58:59 AM  
 Created by:

Charge number: 1  
 Element:  $^{12}\text{C}$ : 0 .. 9,  $^1\text{H}$ : 0 .. 50,  $^{35}\text{Cl}$ : 0 .. 1,  $^{14}\text{N}$ : 0 .. 1,  $^{16}\text{O}$ : 0 .. 2,  $^{32}\text{S}$ : 0 .. 0  
 Tolerance: 50.00 (ppm), 5.00 .. 15.00 (mmu)

Unsaturation Number: -1.0 .. 60.0 (Fraction: Both)

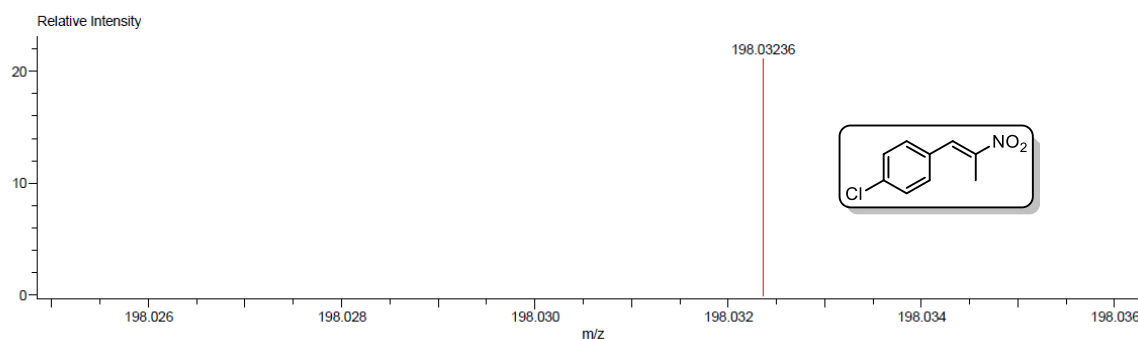

| Mass      | Intensity | Calc. Mass | Mass Difference (mmu) | Mass Difference (ppm) | Possible Formula                                           | Unsaturation Number |
|-----------|-----------|------------|-----------------------|-----------------------|------------------------------------------------------------|---------------------|
| 198.03236 | 1682.79   | 198.03218  | 0.18                  | 0.91                  | $^{12}\text{C}_9\text{H}_9\text{Cl}_1\text{N}_1\text{O}_2$ | 5.5                 |

**Spectrum 15. HRMS of 6e.**

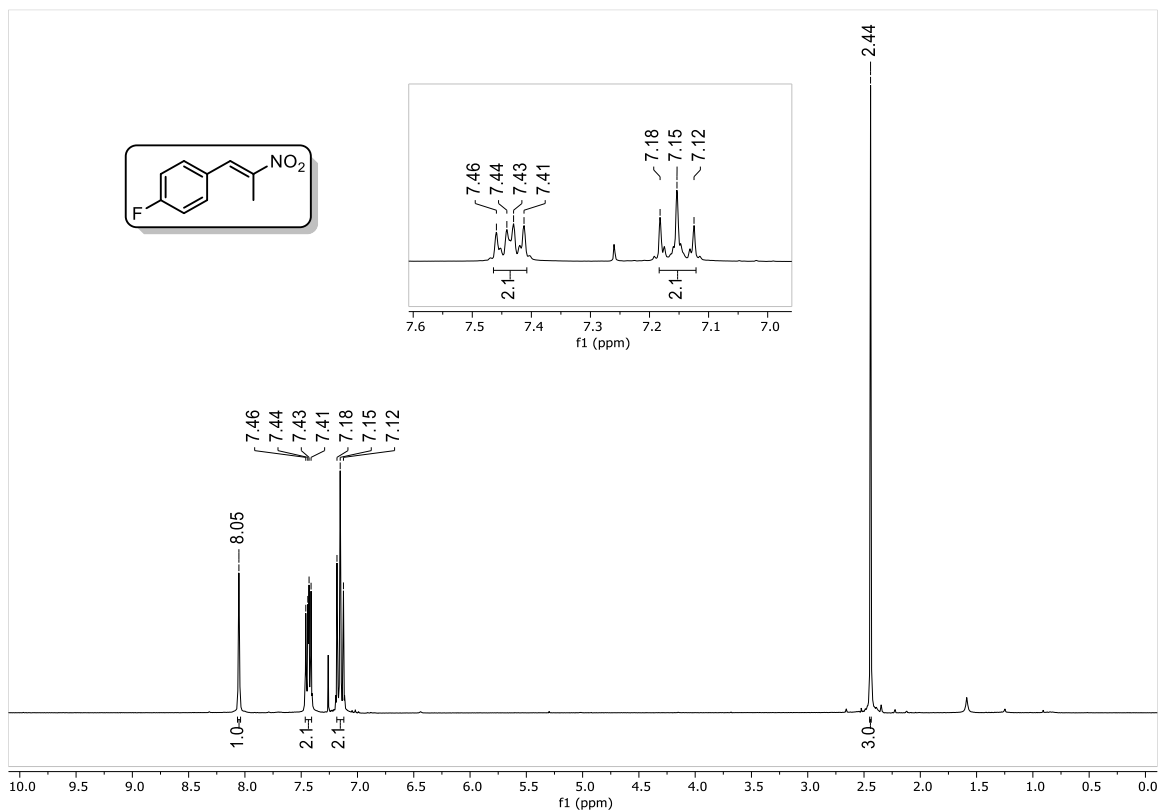

**Spectrum 16.  $^1\text{H}$ -NMR of 6f.**

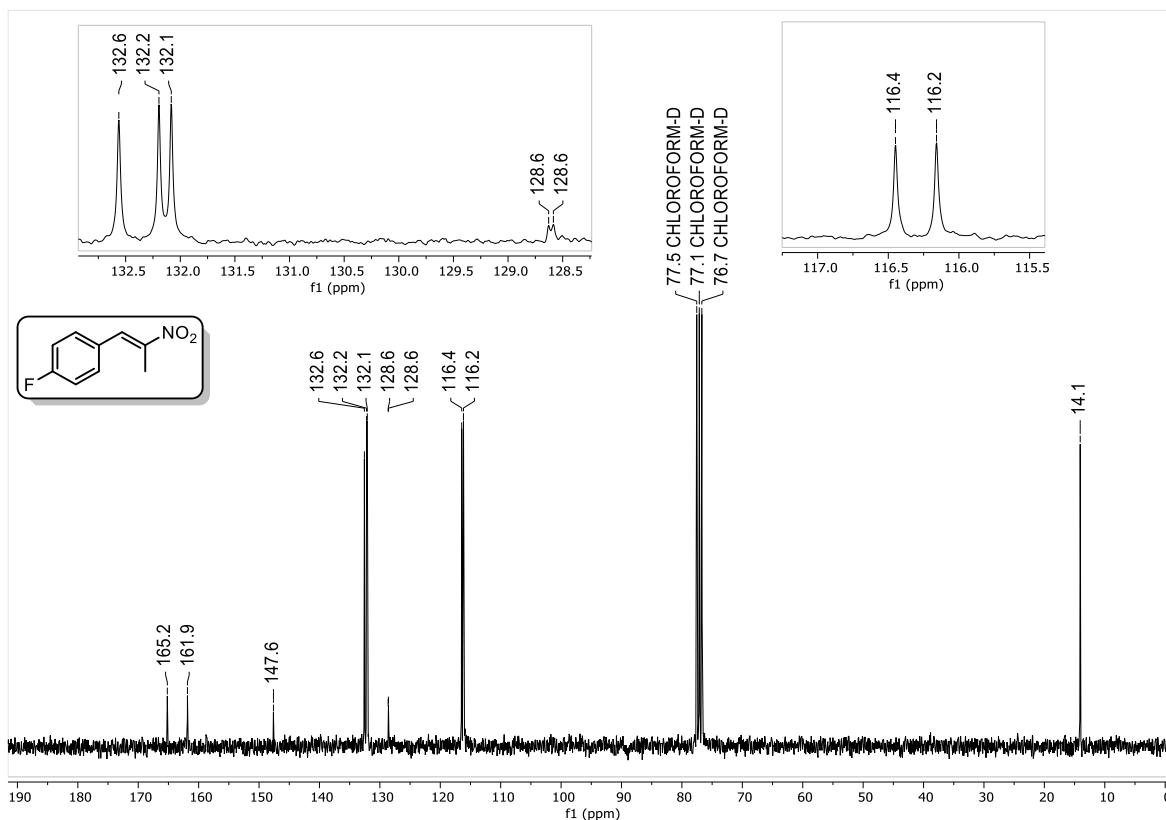

**Spectrum 17.**  $^{13}\text{C}$ -NMR of **6f**.

Description:  
Ionization Mode:ESI+

History:Determine m/z[Peak Detect[Centroid,30,Area];Correct Base[];Smooth[5]];Correct Base[5.0%];Average[MS[...

Mass Calibration data:Cal\_PEG\_600

Created:6/1/2023 10:01:51 AM

Created by:

Charge number:1

Tolerance:5.00(ppm), 5.00 .. 15.00(mmu)

Unsaturation Number:-1.0 .. 60.0 (Fraction:Both)

Element: $^{12}\text{C}$ :0 .. 22,  $^1\text{H}$ :0 .. 28,  $^{35}\text{Cl}$ :0 .. 0,  $^{19}\text{F}$ :1 .. 1,  $^{14}\text{N}$ :0 .. 1,  $^{16}\text{O}$ :0 .. 2,  $^{32}\text{S}$ :0 .. 0

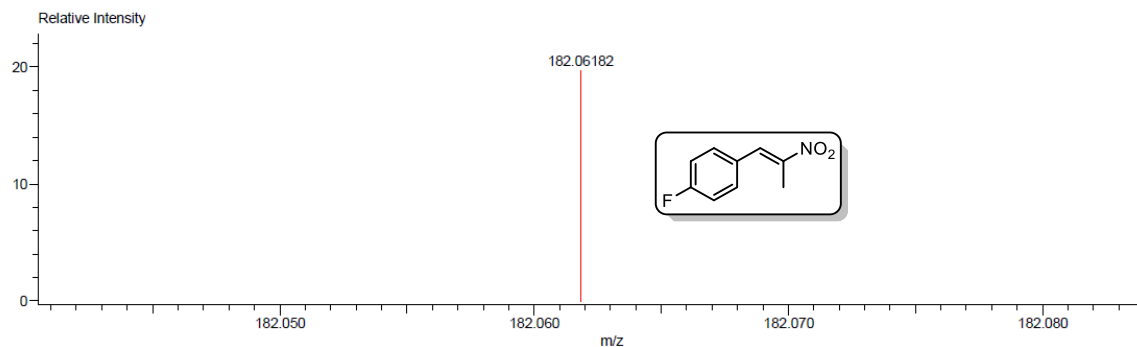

| Mass      | Intensity | Calc. Mass | Mass Difference (mmu) | Mass Difference (ppm) | Possible Formula                                          | Unsaturation Number |
|-----------|-----------|------------|-----------------------|-----------------------|-----------------------------------------------------------|---------------------|
| 182.06182 | 58399.13  | 182.06173  | 0.09                  | 0.49                  | $^{12}\text{C}_9\text{H}_6\text{F}_1\text{N}_1\text{O}_2$ | 5.5                 |

**Spectrum 18.** HRMS of **6f**.

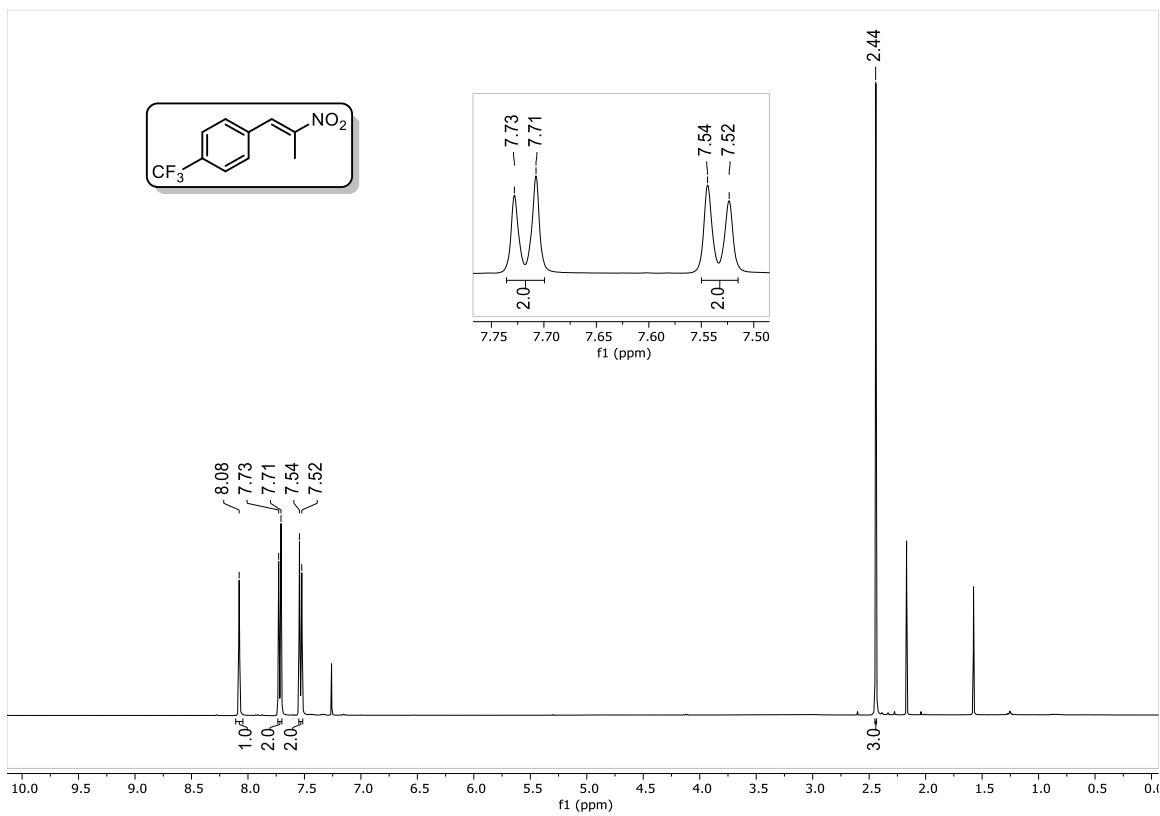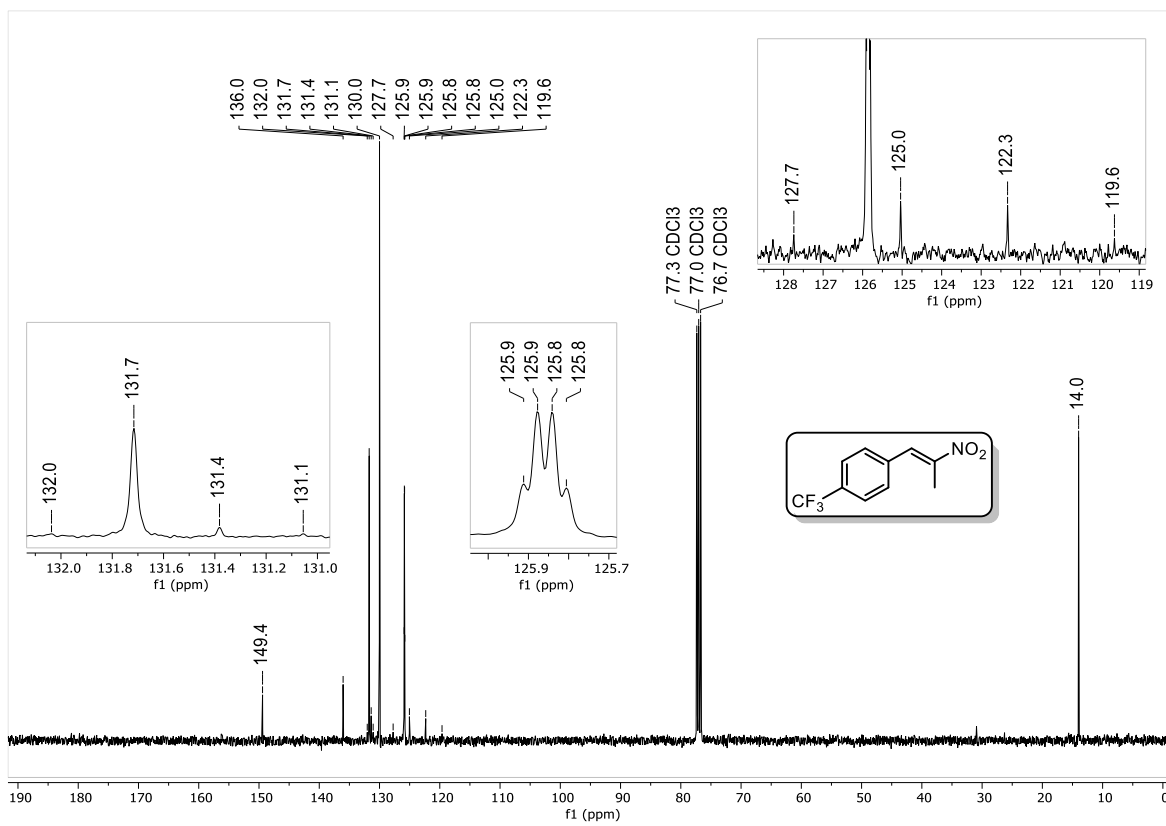

**Spectrum 20. <sup>13</sup>C-NMR of 6g.**

Description:  
 Ionization Mode:ESI+  
 History:Determine m/z[Peak Detect[Centroid,30,Area];Correct Base[];Smooth[5]];Correct Base[5.0%];Average(MS[...

Mass Calibration data:Cal\_PEG\_600  
 Created:6/1/2023 10:17:34 AM  
 Created by:

Charge number:1  
 Element:<sup>12</sup>C:0 .. 10, <sup>1</sup>H:0 .. 28, <sup>35</sup>Cl:0 .. 0, <sup>19</sup>F:0 .. 3, <sup>14</sup>N:0 .. 1, <sup>16</sup>O:0 .. 2, <sup>32</sup>S:0 .. 0  
 Tolerance:5.00(ppm), 5.00 .. 15.00(mmu)

Unsaturation Number:-1.0 .. 60.0 (Fraction:Both)

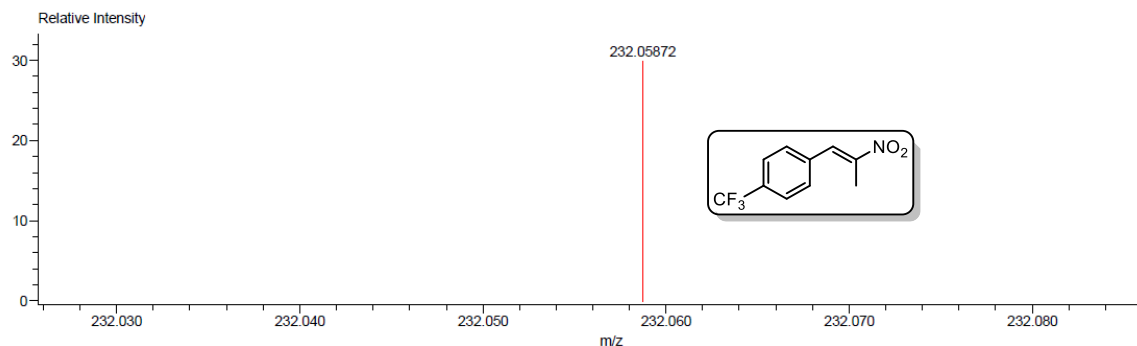

| Mass      | Intensity | Calc. Mass | Mass Difference (mmu) | Mass Difference (ppm) | Possible Formula                                                                                                                                 | Unsaturation Number |
|-----------|-----------|------------|-----------------------|-----------------------|--------------------------------------------------------------------------------------------------------------------------------------------------|---------------------|
| 232.05872 | 23637.22  | 232.05854  | 0.18                  | 0.79                  | <sup>12</sup> C <sub>10</sub> <sup>1</sup> H <sub>6</sub> <sup>19</sup> F <sub>3</sub> <sup>14</sup> N <sub>1</sub> <sup>16</sup> O <sub>2</sub> | 5.5                 |

**Spectrum 21. HRMS of 6g.**

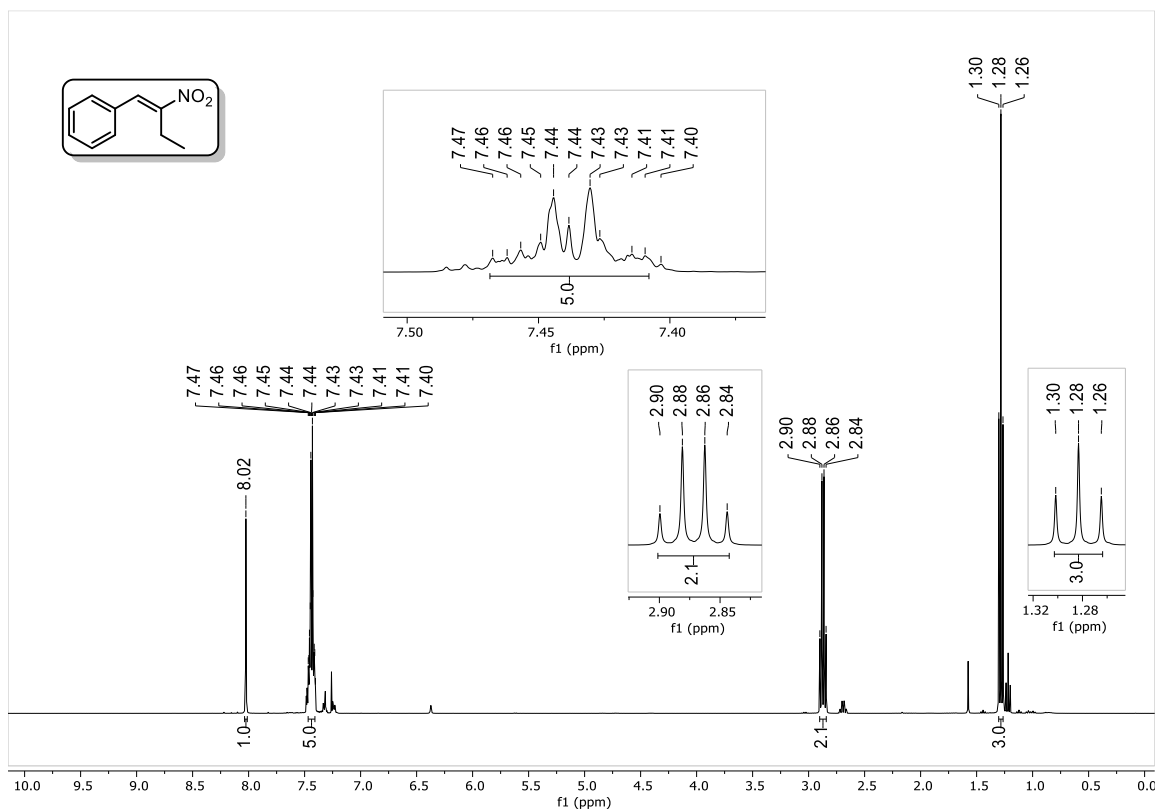

**Spectrum 22. <sup>1</sup>H-NMR of 6h.**

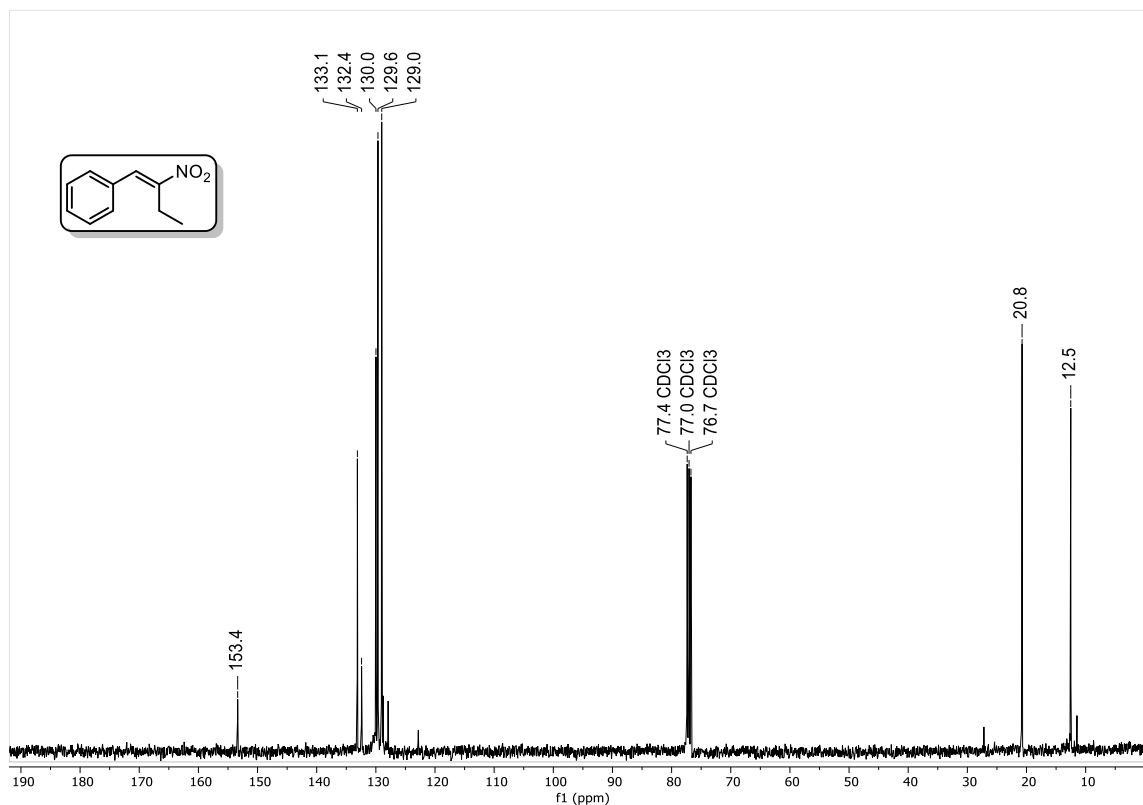

**Spectrum 23.**  $^{13}\text{C}$ -NMR of 6h.

Description:  
Ionization Mode:ESI+

History:Determine m/z[Peak Detect[Centroid,30,Area];Correct Base[];Smooth[5]];Correct Base[5.0%];Average(MS[...

Mass Calibration data:Cal\_PEG\_600

Created:6/2/2023 10:25:54 AM

Created by:

Charge number:1

Tolerance:50.00(ppm), 5.00 .. 15.00(mmu)

Unsaturation Number:-1.0 .. 60.0 (Fraction:Both)

Element: $^{12}\text{C}$ :0 .. 12,  $^1\text{H}$ :0 .. 50,  $^{35}\text{Cl}$ :0 .. 0,  $^{14}\text{N}$ :0 .. 3,  $^{16}\text{O}$ :0 .. 2,  $^{32}\text{S}$ :0 .. 0

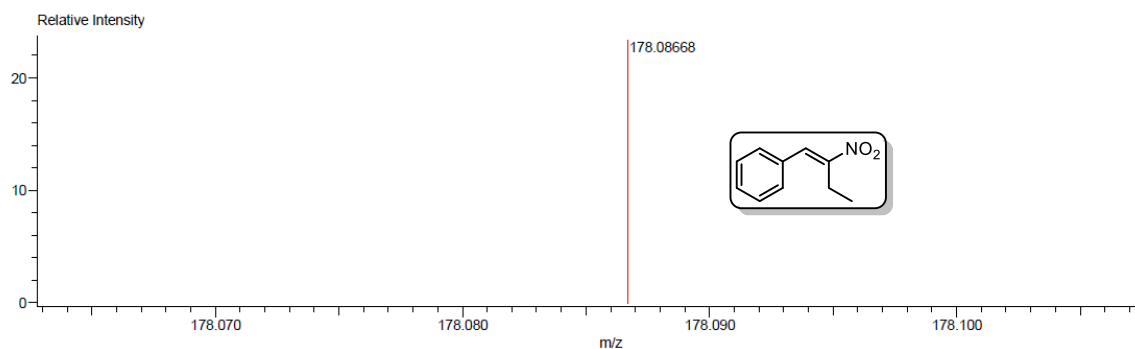

| Mass      | Intensity | Calc. Mass | Mass Difference (mmu) | Mass Difference (ppm) | Possible Formula                                                    | Unsaturation Number |
|-----------|-----------|------------|-----------------------|-----------------------|---------------------------------------------------------------------|---------------------|
| 178.08668 | 1529.45   | 178.08680  | -0.13                 | -0.71                 | $^{12}\text{C}_{10}^{1}\text{H}_{12}^{14}\text{N}_1^{16}\text{O}_2$ | 5.5                 |

**Spectrum 24.** HRMS of 6h.

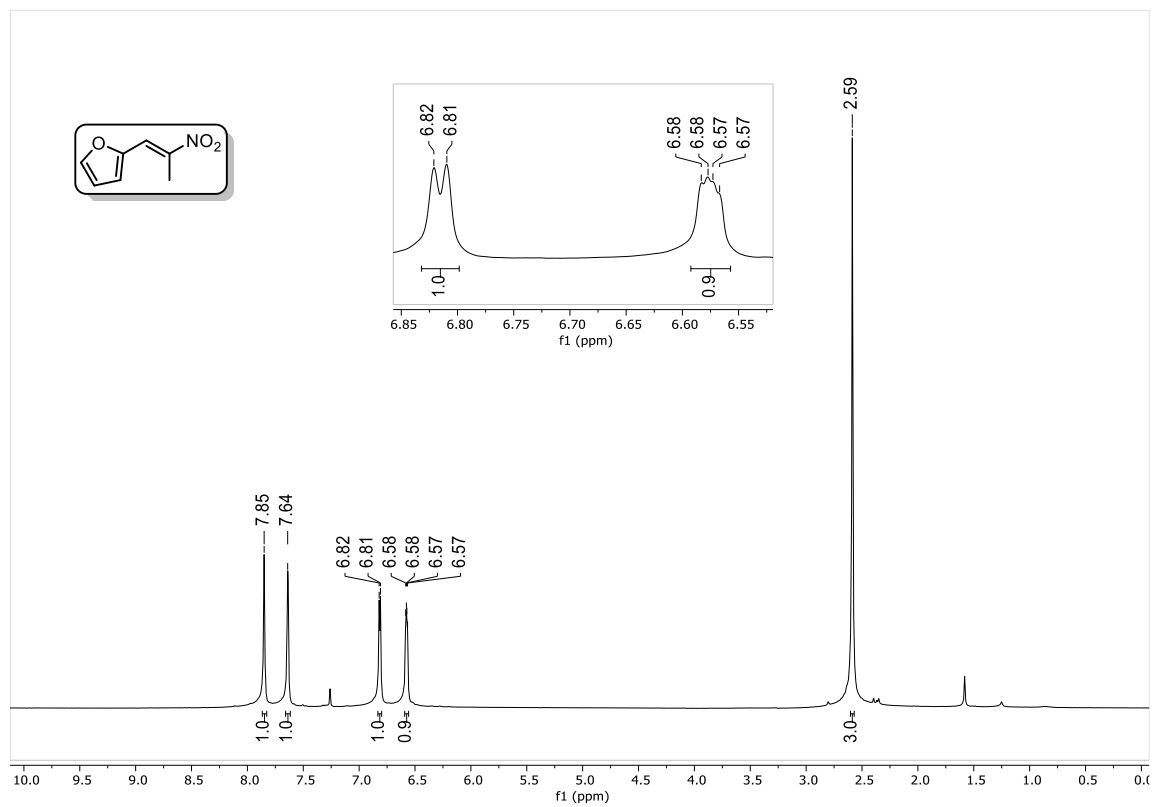

**Spectrum 25.** <sup>1</sup>H-NMR of 6j.

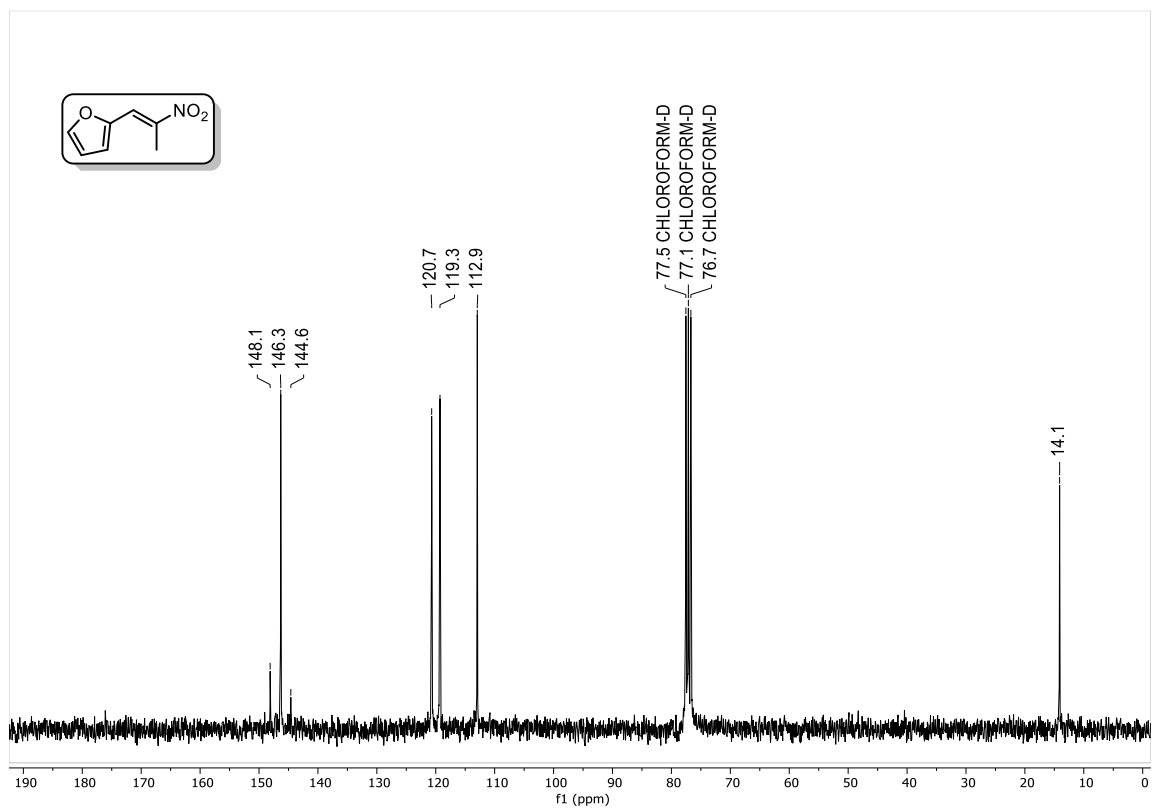

**Spectrum 26.** <sup>13</sup>C-NMR of 6j.

Description:  
 Ionization Mode:ESI+  
 History:Determine m/z[Peak Detect[Centroid,30,Area];Correct Base[];Smooth[5]];Correct Base[5.0%];Average[MS[...

Mass Calibration data:Cal\_PEG\_600  
 Created:6/2/2023 10:06:47 AM  
 Created by:

Charge number:1  
 Tolerance:50.00(ppm), 5.00 .. 15.00(mmu)  
 Element:<sup>12</sup>C:0 .. 7, <sup>1</sup>H:0 .. 50, <sup>35</sup>Cl:0 .. 0, <sup>14</sup>N:0 .. 1, <sup>16</sup>O:0 .. 3, <sup>32</sup>S:0 .. 0

Unsaturation Number:-1.0 .. 60.0 (Fraction:Both)

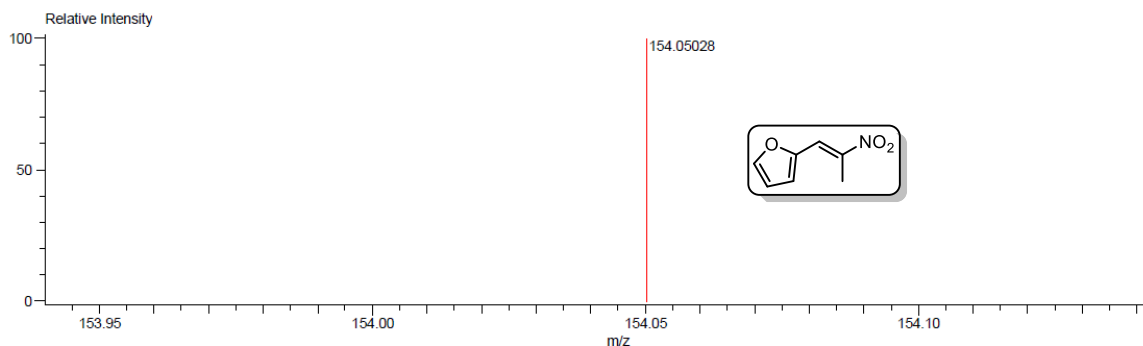

| Mass      | Intensity | Calc. Mass | Mass Difference (mmu) | Mass Difference (ppm) | Possible Formula                                                                                                   | Unsaturation Number |
|-----------|-----------|------------|-----------------------|-----------------------|--------------------------------------------------------------------------------------------------------------------|---------------------|
| 154.05028 | 92551.73  | 154.05042  | -0.13                 | -0.87                 | <sup>12</sup> C <sub>7</sub> <sup>1</sup> H <sub>8</sub> <sup>14</sup> N <sub>1</sub> <sup>16</sup> O <sub>3</sub> | 4.5                 |

Spectrum 27. HRMS of 6j.

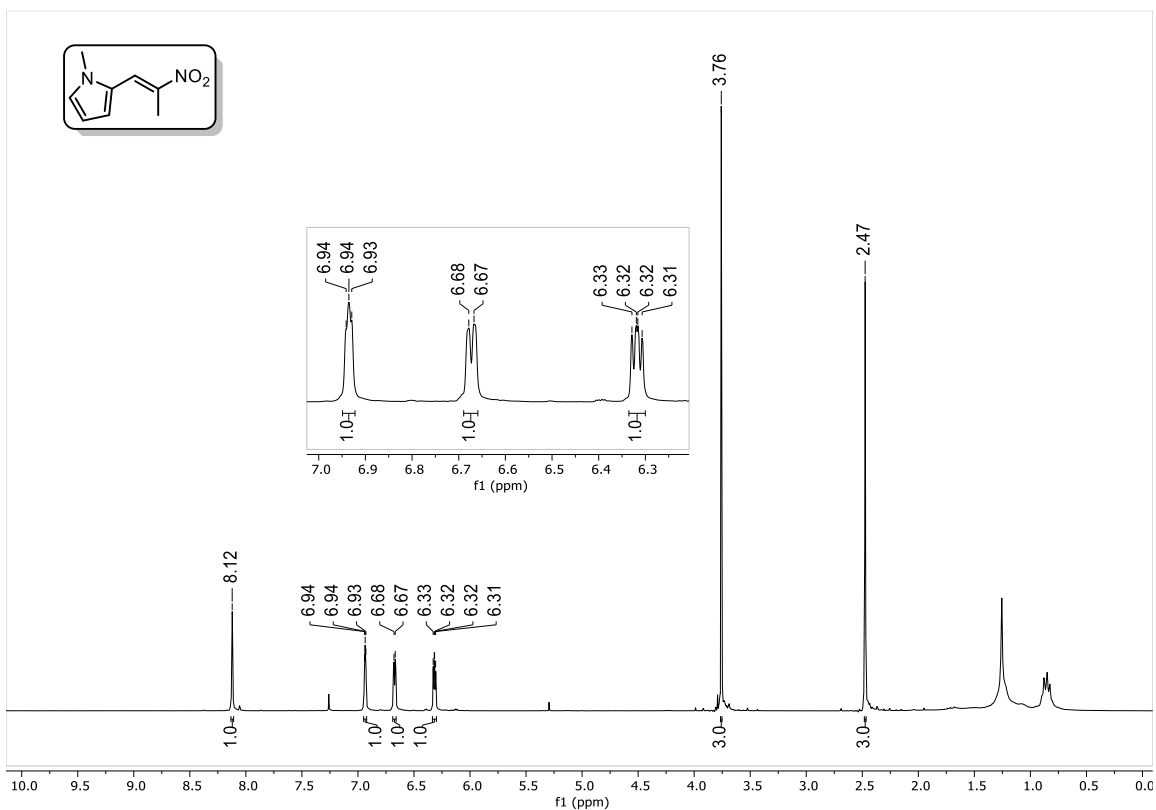

Spectrum 28. <sup>1</sup>H-NMR of 6k.



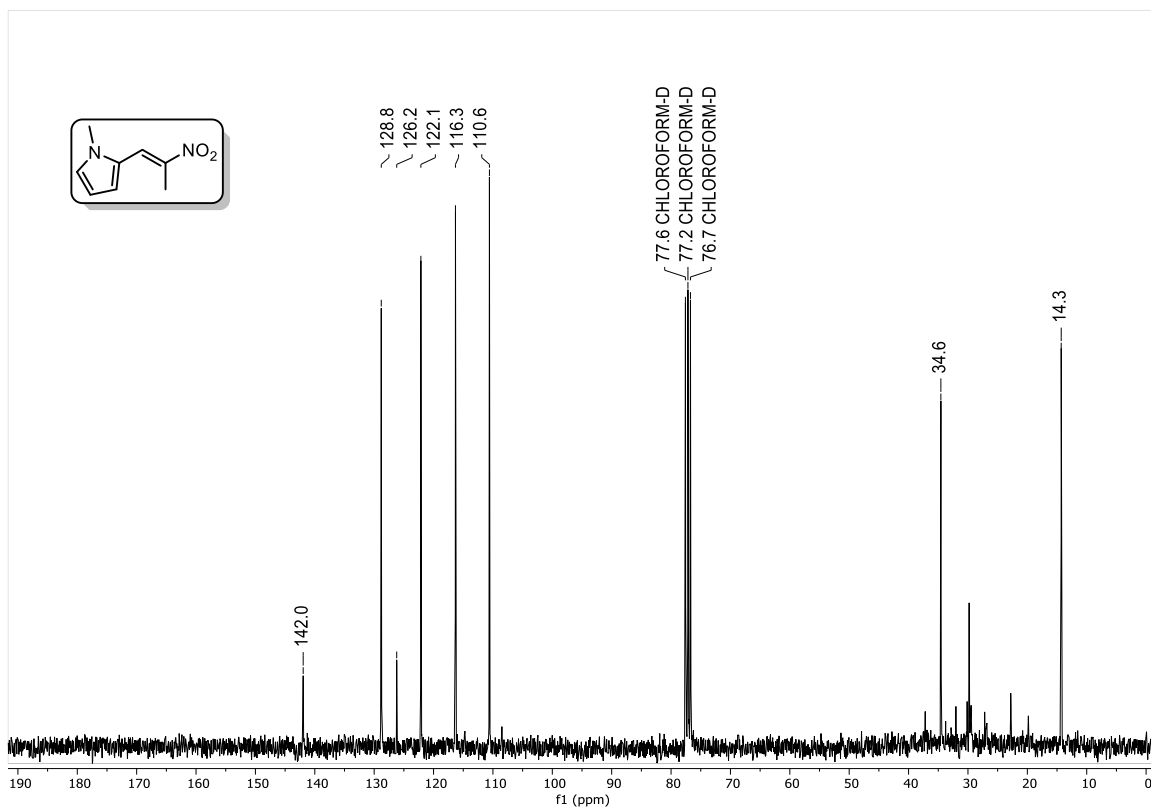

**Spectrum 29.**  $^{13}\text{C}$ -NMR of 6k.

Description:  
Ionization Mode:ESI+

History:Determine m/z[Peak Detect[Centroid,30,Area];Correct Base[];Smooth[5]];Correct Base[5.0%];Average(MS[...

Mass Calibration data:Cal\_PEG\_600

Created:6/2/2023 10:11:27 AM

Created by:

Charge number:1

Tolerance:50.00(ppm), 5.00 .. 15.00(mmu)

Unsaturation Number:-1.0 .. 60.0 (Fraction:Both)

Element: $^{12}\text{C}$ :0 .. 8,  $^1\text{H}$ :0 .. 50,  $^{35}\text{Cl}$ :0 .. 0,  $^{14}\text{N}$ :0 .. 2,  $^{16}\text{O}$ :0 .. 2,  $^{32}\text{S}$ :0 .. 0

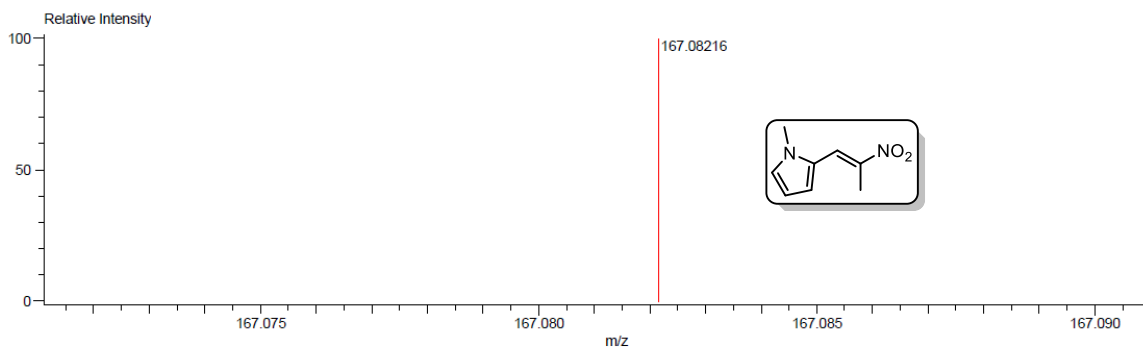

| Mass      | Intensity | Calc. Mass | Mass Difference (mmu) | Mass Difference (ppm) | Possible Formula                                                 | Unsaturation Number |
|-----------|-----------|------------|-----------------------|-----------------------|------------------------------------------------------------------|---------------------|
| 167.08216 | 6406.48   | 167.08205  | 0.11                  | 0.66                  | $^{12}\text{C}_8^{1}\text{H}_{11}^{14}\text{N}_2^{16}\text{O}_2$ | 4.5                 |

**Spectrum 30.** HRMS of 6k.

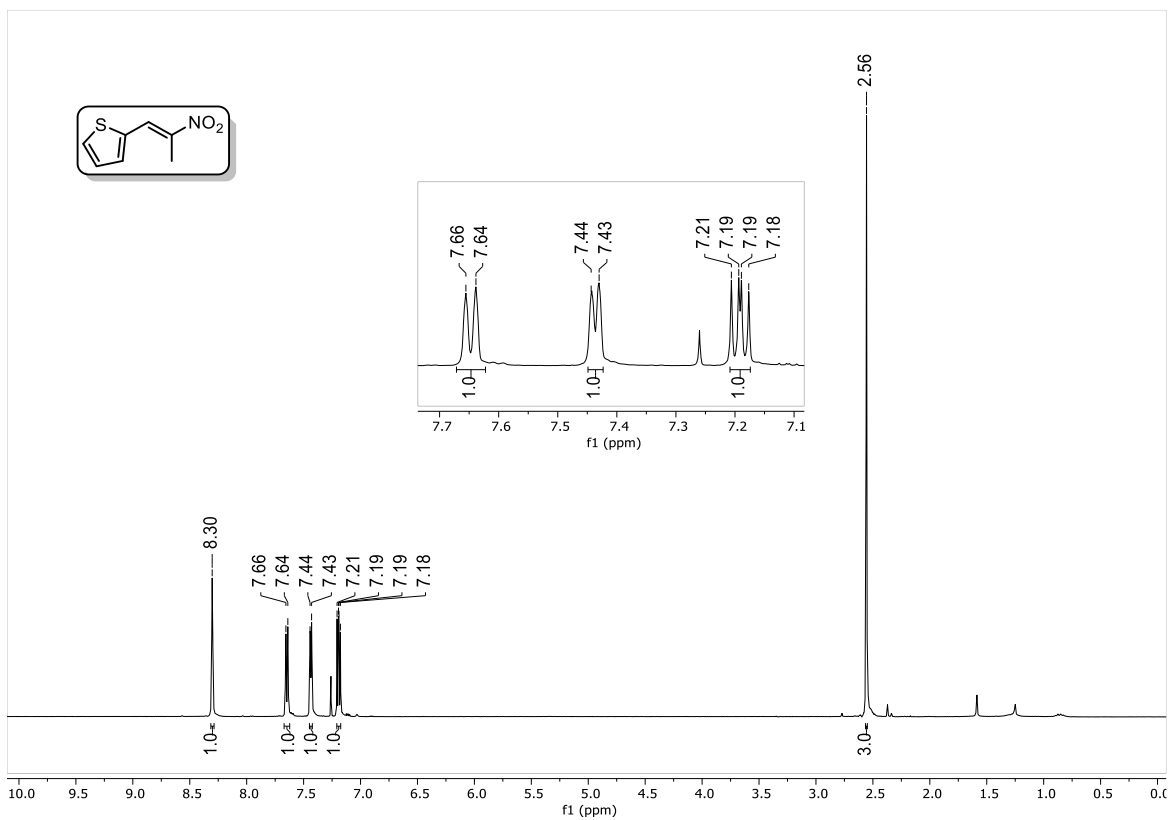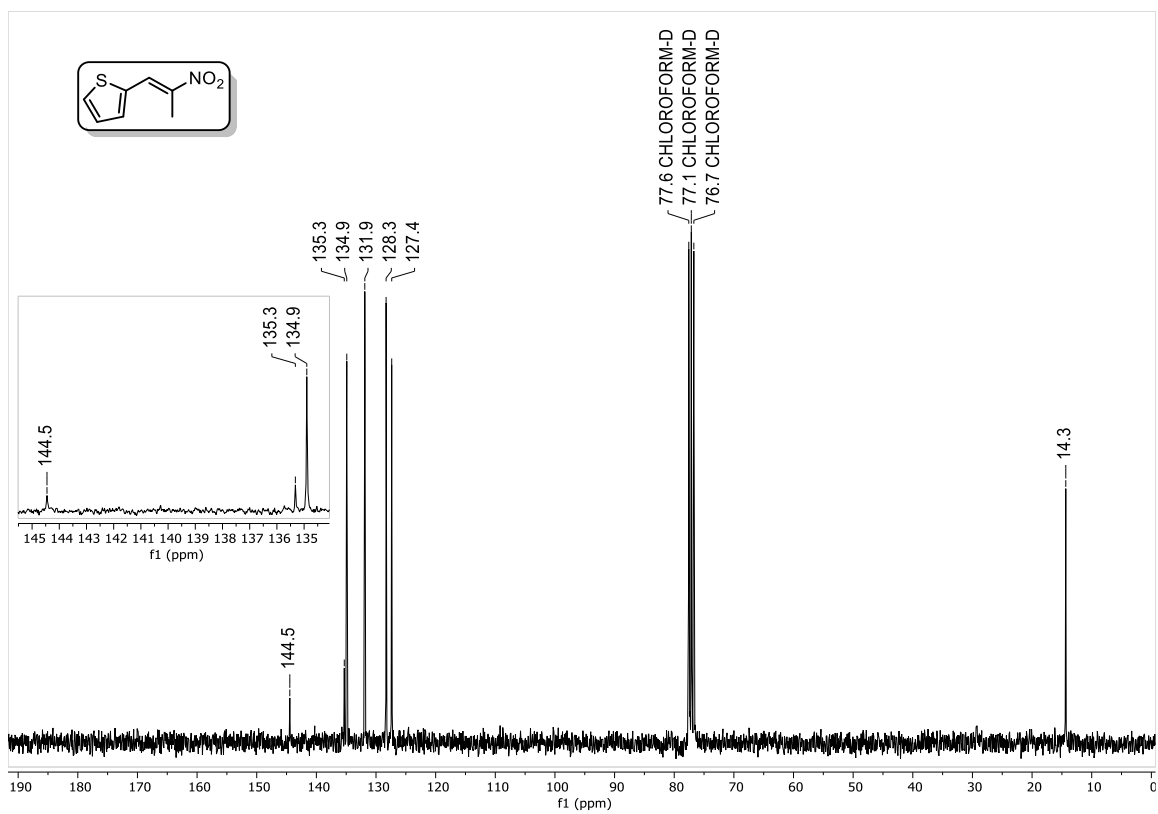

Description:  
 Ionization Mode:ESI+  
 History:Determine m/z[Peak Detect[Centroid,30,Area];Correct Base[];Smooth[5]];Correct Base[5.0%];Average(MS[...

Mass Calibration data:Cal\_PEG\_600  
 Created:6/2/2023 9:53:05 AM  
 Created by:

Charge number:1  
 Tolerance:50.00(ppm), 5.00 .. 15.00(mmu)  
 Element:<sup>12</sup>C:0 .. 8, <sup>1</sup>H:0 .. 50, <sup>35</sup>Cl:0 .. 0, <sup>14</sup>N:0 .. 1, <sup>16</sup>O:0 .. 2, <sup>32</sup>S:0 .. 1

Unsaturation Number:-1.0 .. 60.0 (Fraction:Both)

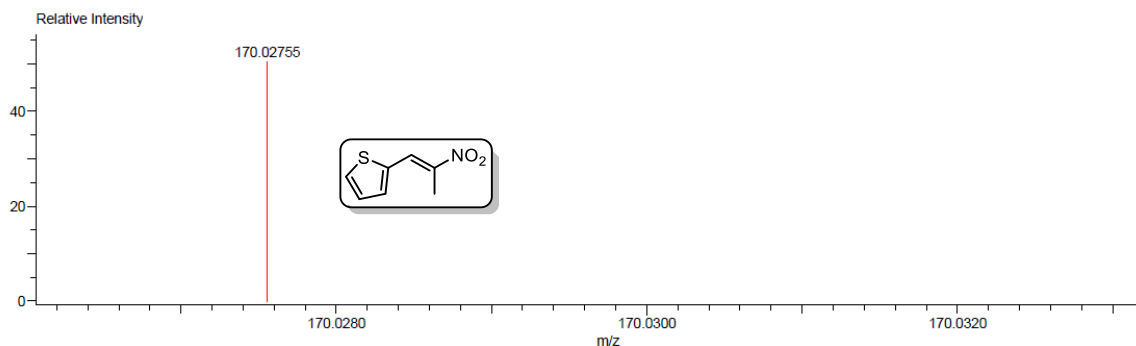

| Mass      | Intensity | Calc. Mass | Mass Difference (mmu) | Mass Difference (ppm) | Possible Formula                                                                                                                                | Unsaturation Number |
|-----------|-----------|------------|-----------------------|-----------------------|-------------------------------------------------------------------------------------------------------------------------------------------------|---------------------|
| 170.02755 | 3602.55   | 170.02757  | -0.02                 | -0.12                 | <sup>12</sup> C <sub>7</sub> <sup>1</sup> H <sub>8</sub> <sup>14</sup> N <sub>1</sub> <sup>16</sup> O <sub>2</sub> <sup>32</sup> S <sub>1</sub> | 5.5                 |

**Spectrum 33. HRMS of 6I.**

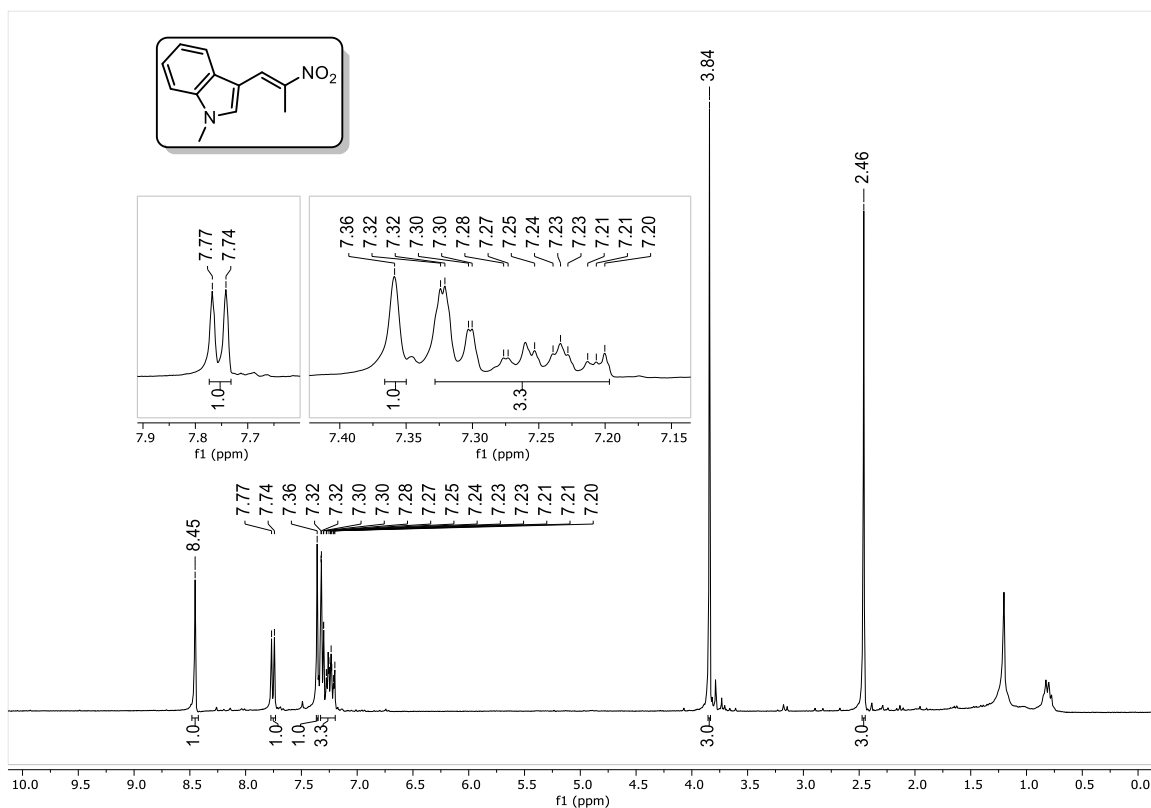

**Spectrum 34. <sup>1</sup>H-NMR of 6m.**

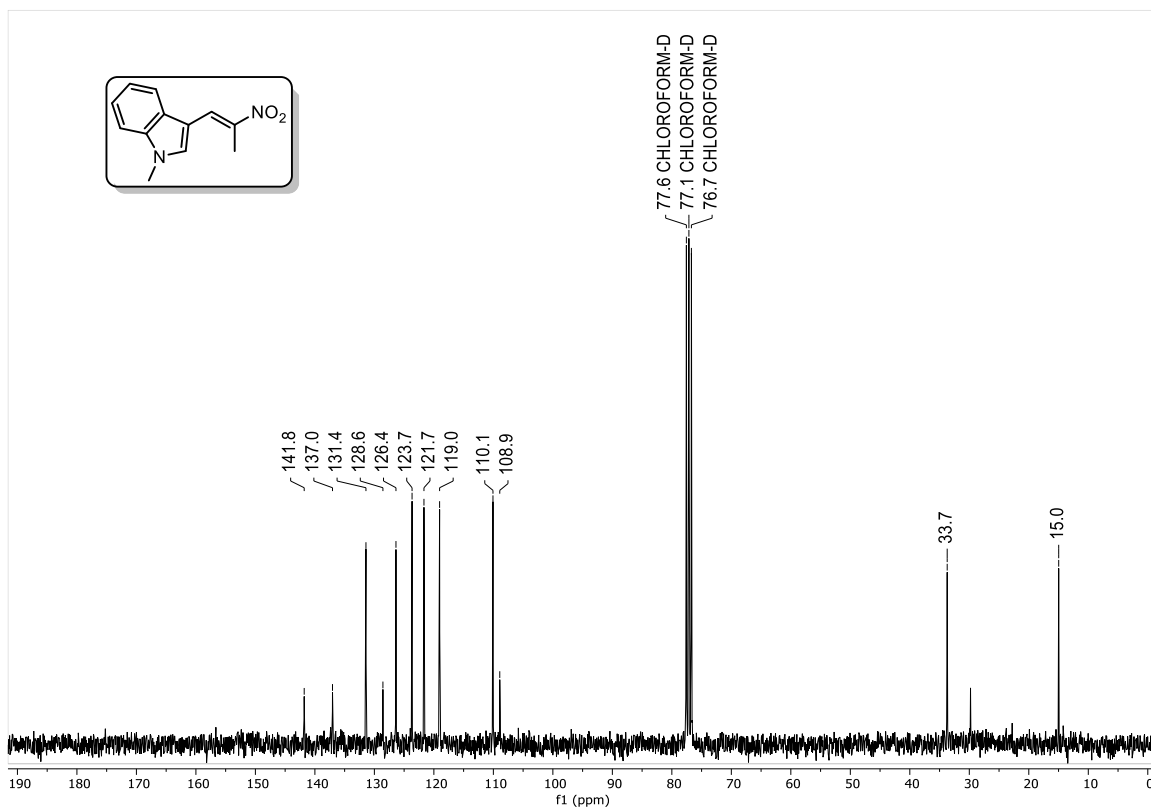

**Spectrum 35. <sup>13</sup>C-NMR of 6m.**

Description:  
Ionization Mode:ESI+

History:Determine m/z[Peak Detect[Centroid,30,Area],Correct Base[];Smooth[5]];Correct Base[5.0%];Average(MS[...

Mass Calibration data:Cal\_PEG\_600  
Created:6/6/2023 10:43:33 AM  
Created by:AccuTOF

Charge number:1

Tolerance:100.00(ppm), 5.00 .. 15.00(mmu)

Unsaturation Number:-1.0 .. 60.0 (Fraction:Both)

Element:<sup>12</sup>C:12 .. 12, <sup>1</sup>H:13 .. 30, <sup>14</sup>N:0 .. 2, <sup>16</sup>O:2 .. 2

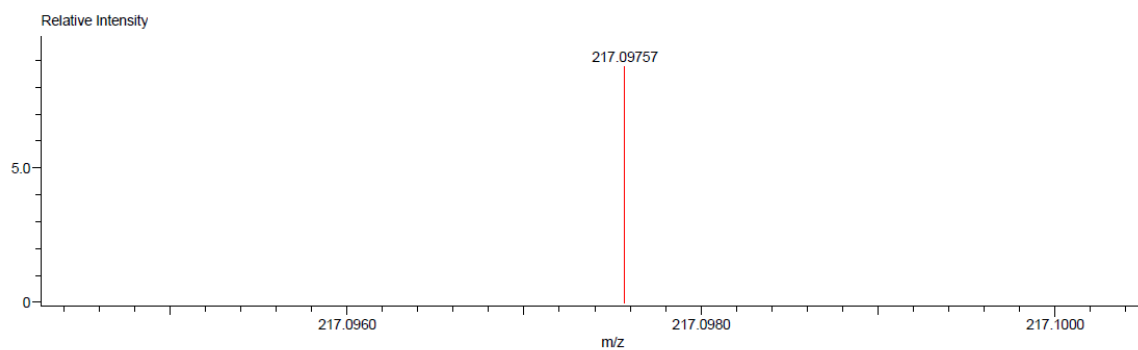

| Mass      | Intensity | Calc. Mass | Mass Difference (mmu) | Mass Difference (ppm) | Possible Formula                                                                                                     | Unsaturation Number |
|-----------|-----------|------------|-----------------------|-----------------------|----------------------------------------------------------------------------------------------------------------------|---------------------|
| 217.09757 | 8308.68   | 217.09770  | -0.13                 | -0.61                 | <sup>12</sup> C <sub>12</sub> <sup>1</sup> H <sub>13</sub> <sup>14</sup> N <sub>2</sub> <sup>16</sup> O <sub>2</sub> | 7.5                 |

**Spectrum 36. HRMS of 6m.**

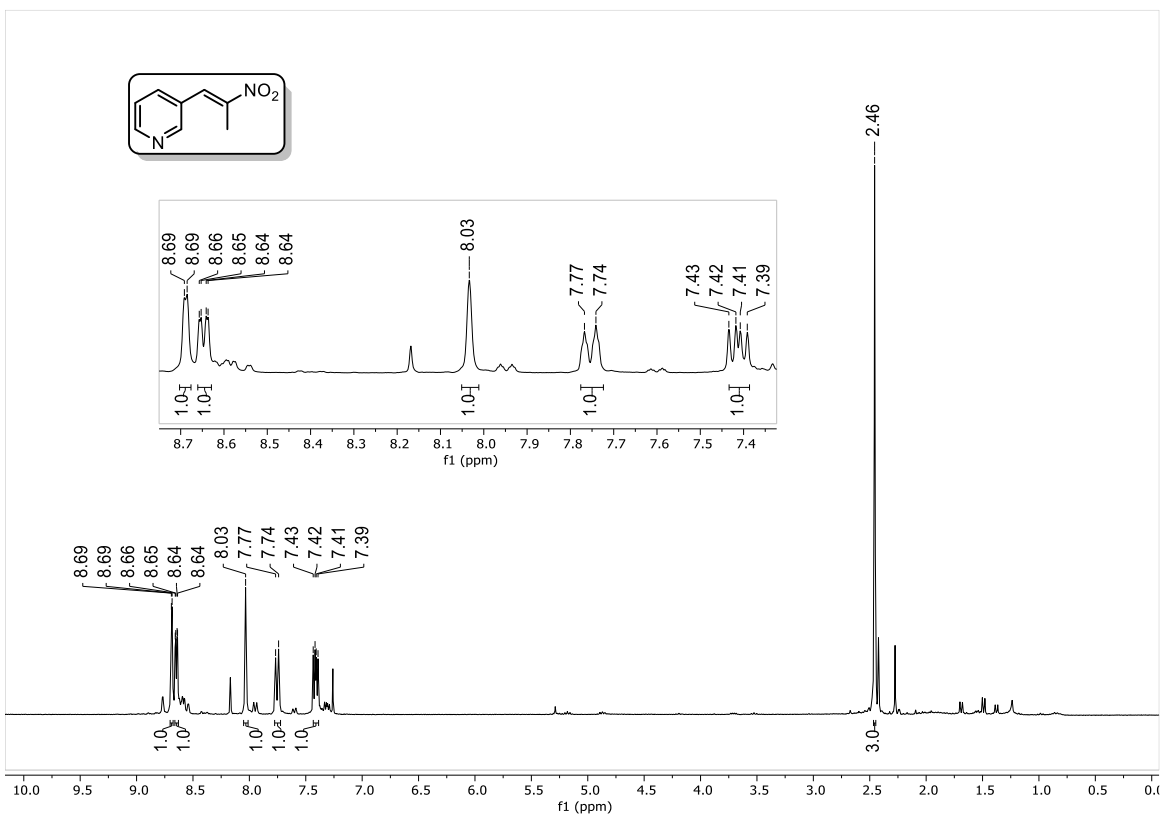

**Spectrum 37.**  $^1\text{H-NMR}$  of 6n.

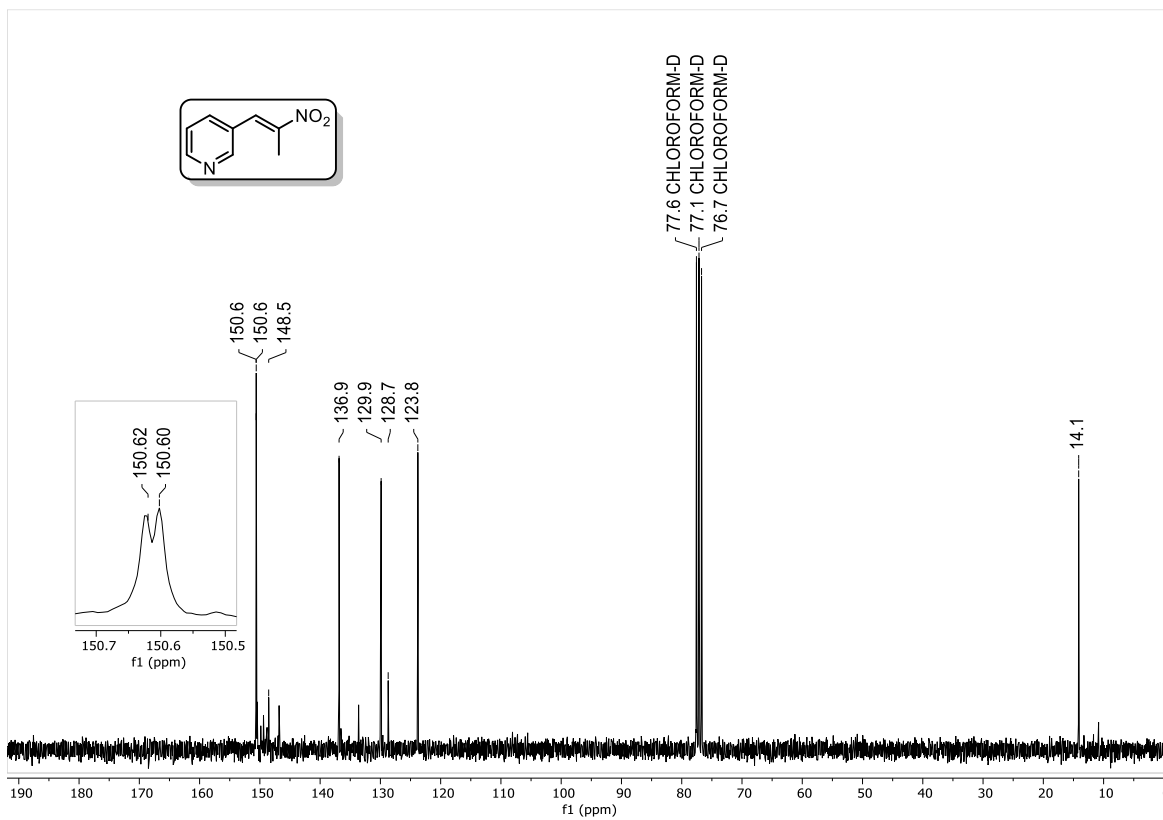

**Spectrum 38.**  $^{13}\text{C-NMR}$  of 6n.

Description:  
Ionization Mode:ESI+  
History:Determine m/z[Peak Detect[Centroid,30,Area];Correct Base[];Smooth[5]];Correct Base[5.0%];Average(MS[...

Mass Calibration data:Cal\_PEG\_600  
Created:6/2/2023 10:20:25 AM  
Created by:

Charge number:1  
Tolerance:50.00(ppm), 5.00 .. 15.00(mmu)  
Element:<sup>12</sup>C:0 .. 12, <sup>1</sup>H:0 .. 50, <sup>35</sup>Cl:0 .. 0, <sup>14</sup>N:0 .. 3, <sup>16</sup>O:0 .. 2, <sup>32</sup>S:0 .. 0

Unsaturation Number:-1.0 .. 60.0 (Fraction:Both)

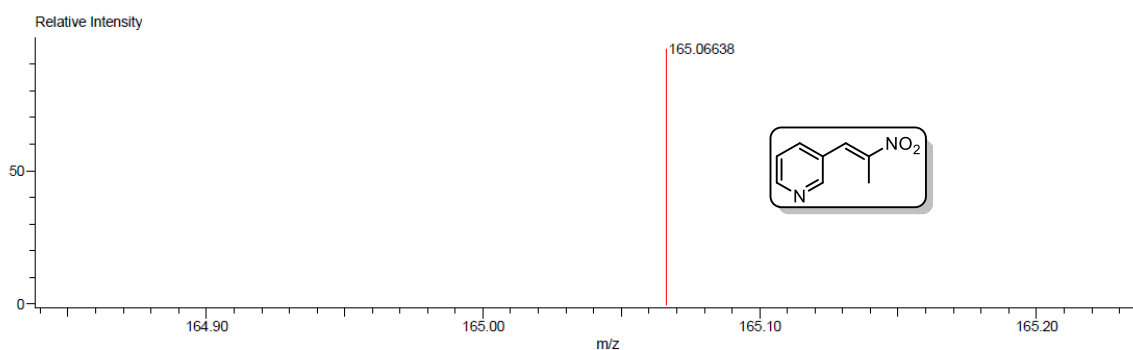

| Mass      | Intensity | Calc. Mass | Mass Difference (mmu) | Mass Difference (ppm) | Possible Formula                                                                                                   | Unsaturation Number |
|-----------|-----------|------------|-----------------------|-----------------------|--------------------------------------------------------------------------------------------------------------------|---------------------|
| 165.06638 | 3005.60   | 165.06640  | -0.02                 | -0.11                 | <sup>12</sup> C <sub>8</sub> <sup>1</sup> H <sub>8</sub> <sup>14</sup> N <sub>2</sub> <sup>16</sup> O <sub>2</sub> | 5.5                 |

**Spectrum 39. HRMS of 6n.**

$^1\text{H}$ -NMR,  $^{13}\text{C}$ -NMR, and HRMS spectra of the  
pyrazoles.

---

---

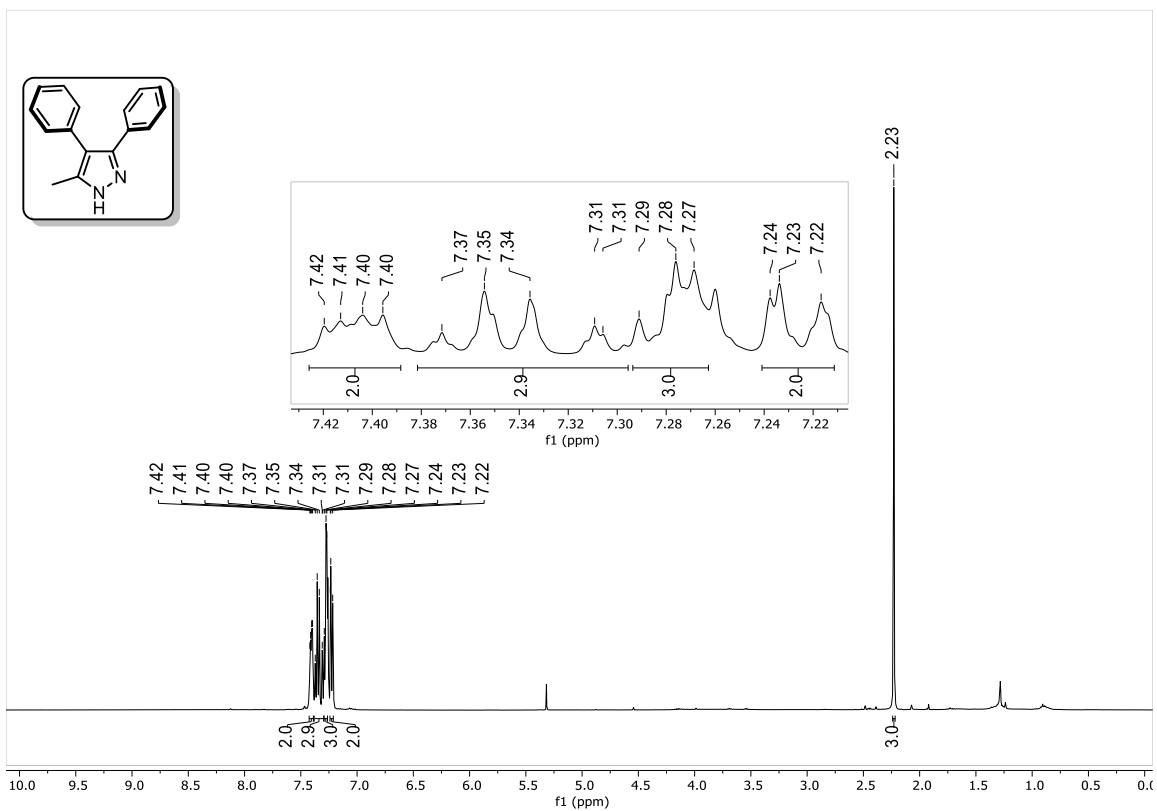

Spectrum 40. <sup>1</sup>H-NMR of 8a.

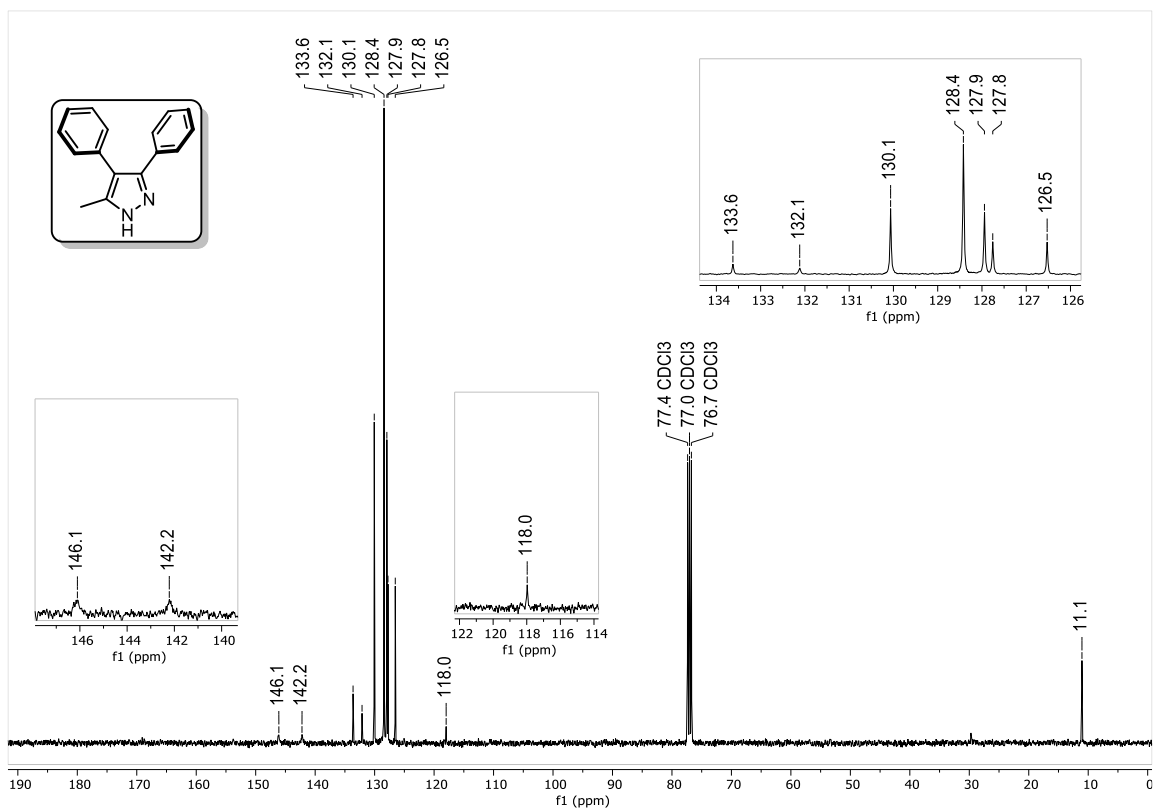

Spectrum 41. <sup>13</sup>C-NMR of 8a.



Description:  
 Ionization Mode:ESI+  
 History:Determine m/z[Peak Detect[Centroid,30,Area];Correct Base[];Smooth[5]];Correct Base[5.0%];Average[MS[...

Mass Calibration data:CaI\_PEG\_600  
 Created:11/28/2022 2:08:11 PM  
 Created by:AccuTOF

Charge number:1  
 Element:<sup>12</sup>C:0 .. 16, <sup>1</sup>H:0 .. 50, <sup>79</sup>Br:0 .. 0, <sup>14</sup>N:2 .. 2, <sup>16</sup>O:0 .. 0  
 Tolerance:200.00(ppm), 5.00 .. 15.00(mmu)

Unsaturation Number:0.0 .. 30.0 (Fraction:Both)

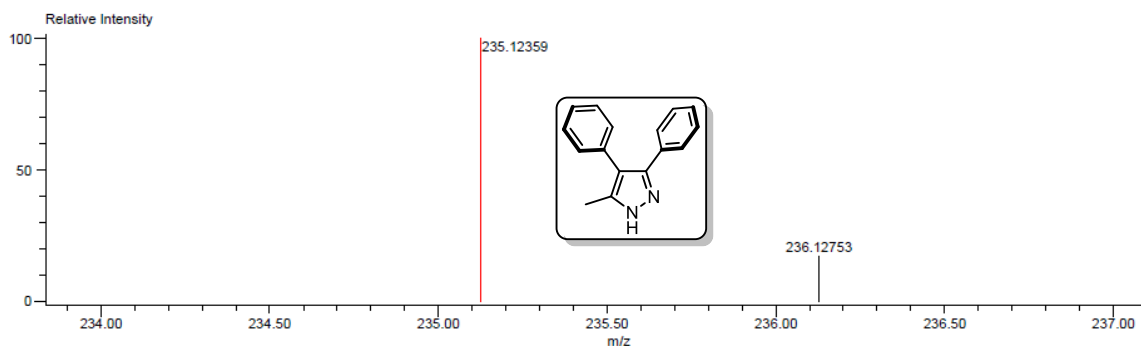

| Mass      | Intensity | Calc. Mass | Mass Difference (mmu) | Mass Difference (ppm) | Possible Formula                                                                        | Unsaturation Number |
|-----------|-----------|------------|-----------------------|-----------------------|-----------------------------------------------------------------------------------------|---------------------|
| 235.12359 | 176868.61 | 235.12352  | 0.06                  | 0.27                  | <sup>12</sup> C <sub>16</sub> <sup>1</sup> H <sub>15</sub> <sup>14</sup> N <sub>2</sub> | 10.5                |

Spectrum 42. HRMS of 8a.

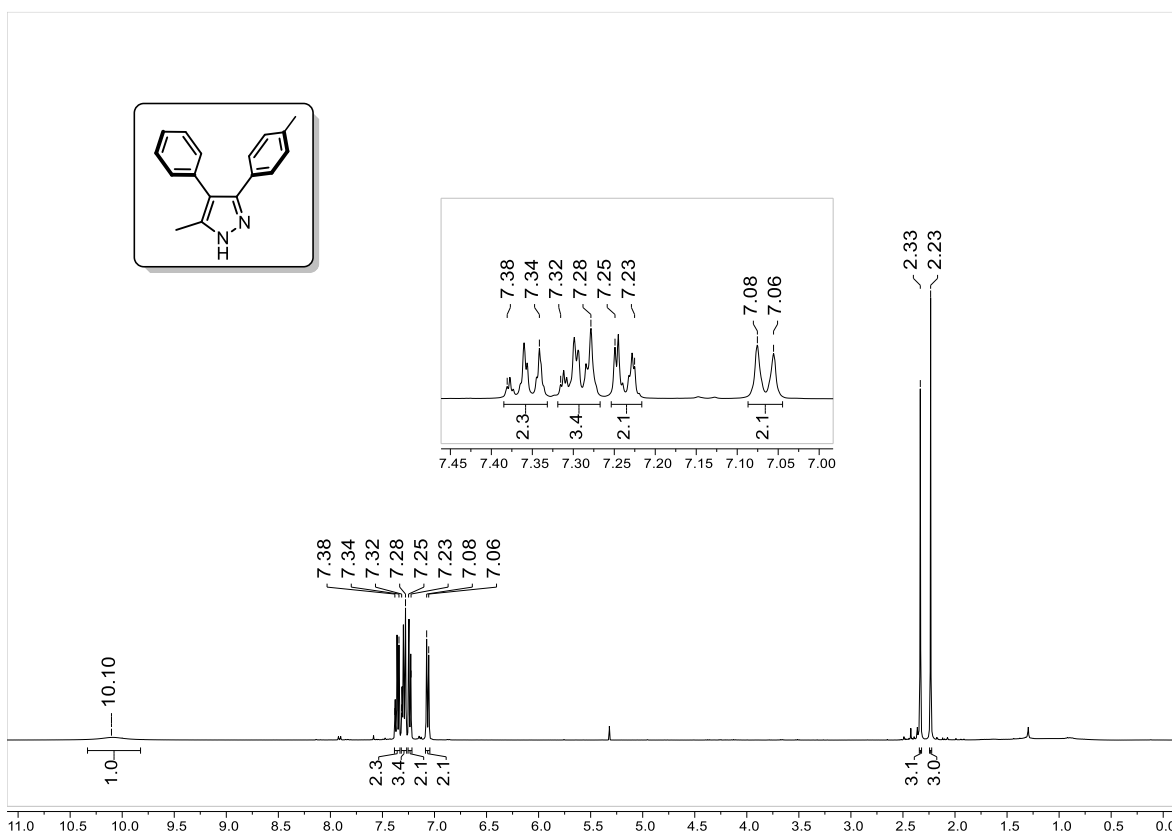

Spectrum 43. <sup>1</sup>H-NMR of 8b.

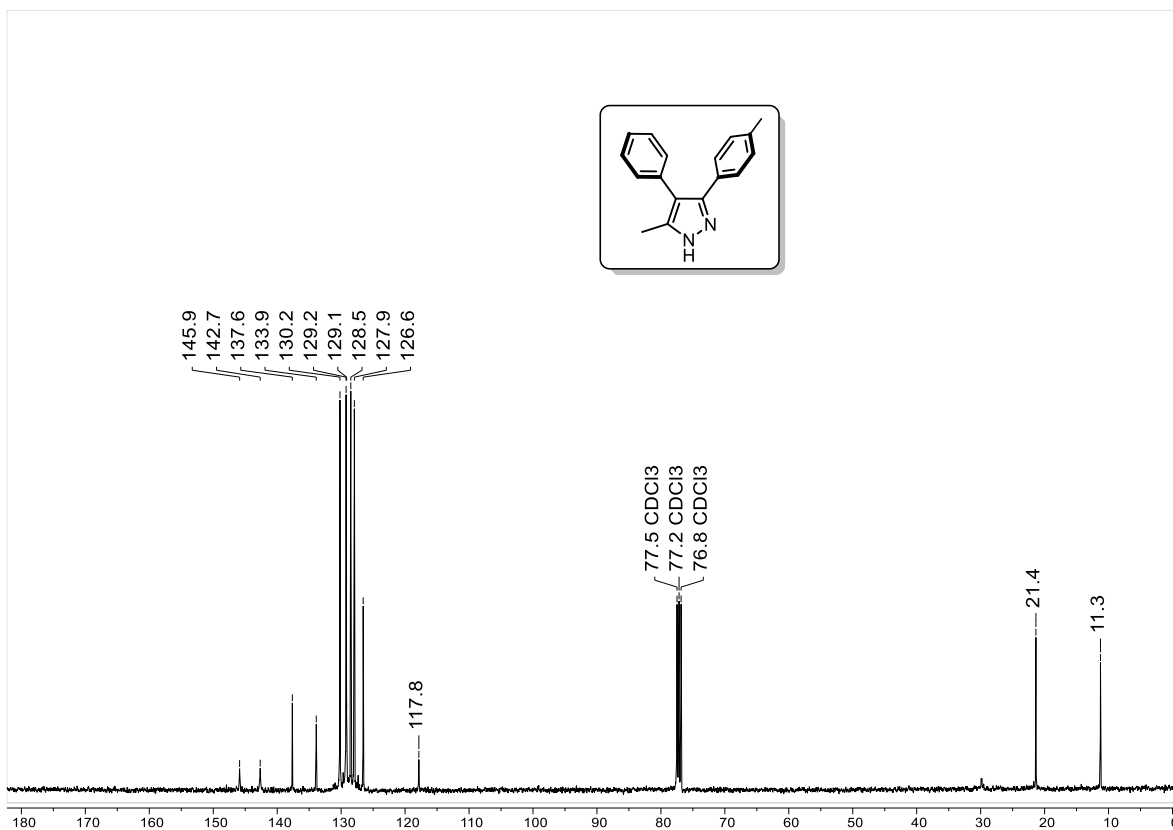

**Spectrum 44. <sup>13</sup>C-NMR of 8b.**

Description:  
 Ionization Mode:ESI+  
 History:Determine m/z[Peak Detect[Centroid,30,Area],Correct Base[];Smooth[5]];Correct Base[5.0%];Average[MS[...

Mass Calibration data:Cal\_PEG\_600  
 Created:2/23/2023 12:46:57 PM  
 Created by:AccuTOF

Charge number:1  
 Element:<sup>12</sup>C:0 .. 20, <sup>1</sup>H:0 .. 18, <sup>14</sup>N:0 .. 3, <sup>16</sup>O:0 .. 1

Tolerance:4.00(ppm), 5.00 .. 15.00(mmu)

Unsaturation Number:0.0 .. 40.0 (Fraction:Both)

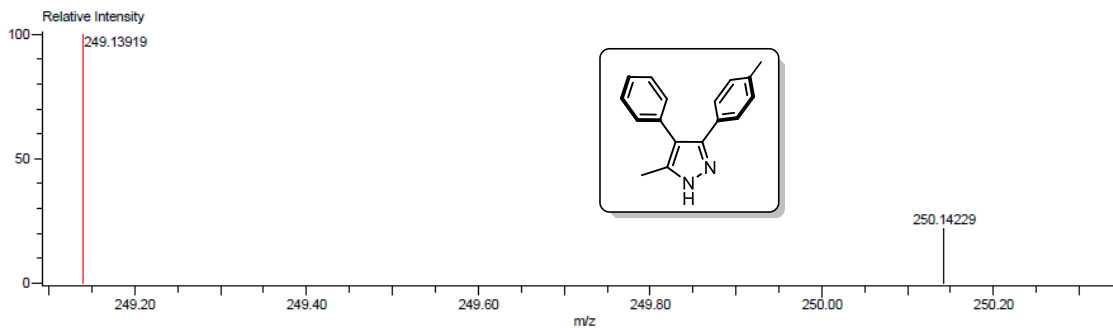

| Mass      | Intensity | Calc. Mass | Mass Difference (mmu) | Mass Difference (ppm) | Possible Formula                                                                        | Unsaturation Number |
|-----------|-----------|------------|-----------------------|-----------------------|-----------------------------------------------------------------------------------------|---------------------|
| 249.13919 | 5395.11   | 249.13917  | 0.02                  | 0.07                  | <sup>12</sup> C <sub>17</sub> <sup>1</sup> H <sub>17</sub> <sup>14</sup> N <sub>2</sub> | 10.5                |

**Spectrum 45. HRMS of 8b.**

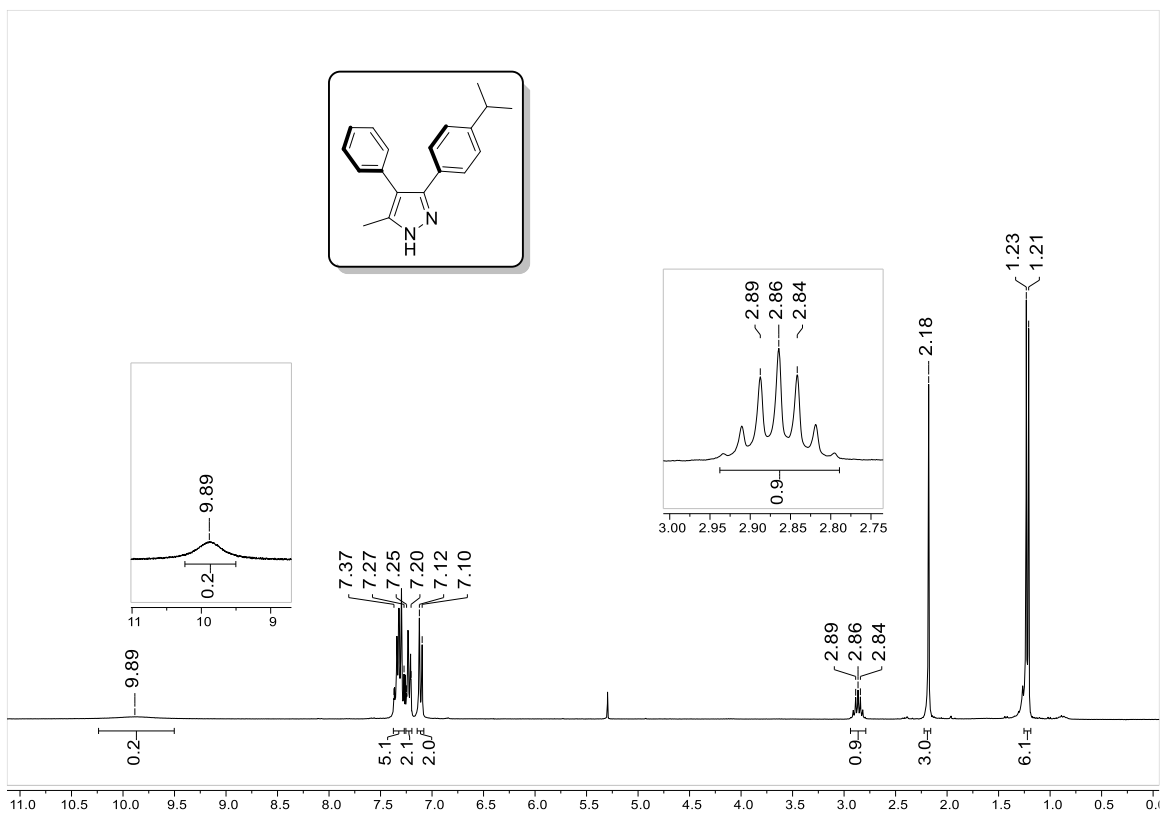

Spectrum 46. <sup>1</sup>H-NMR of 8c.

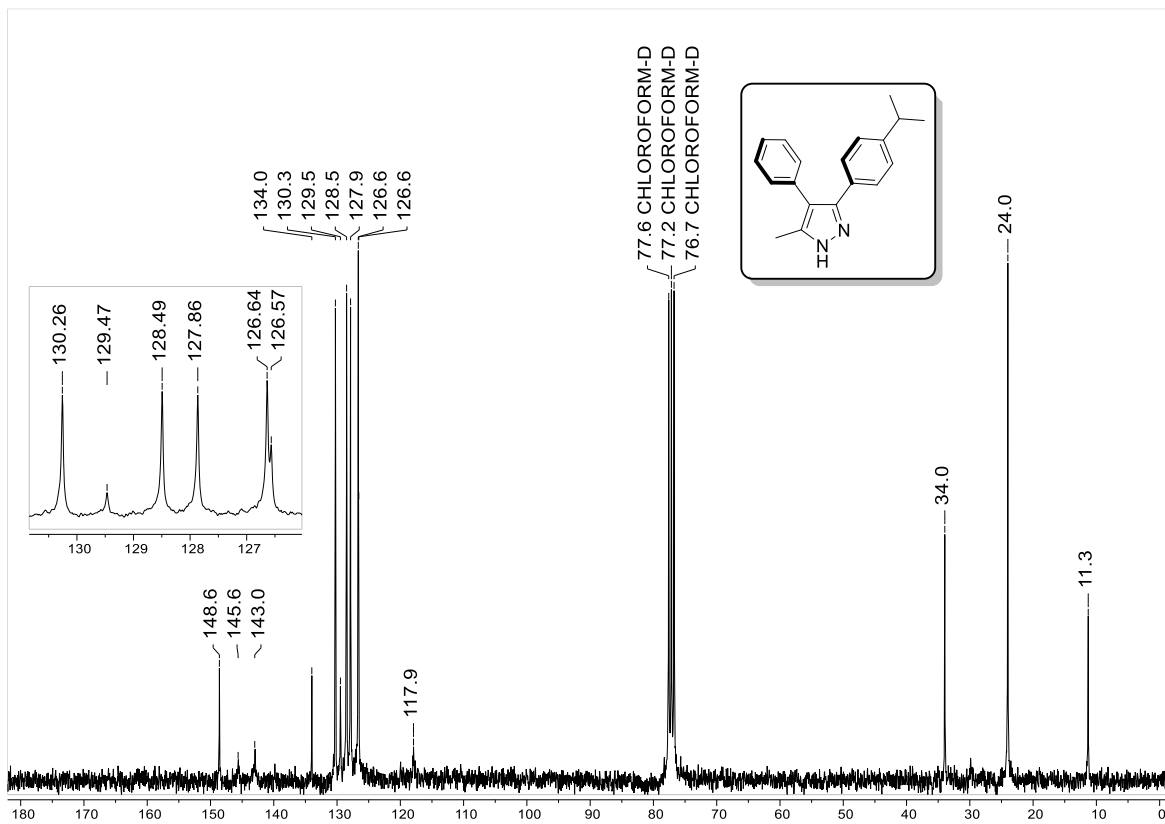

Spectrum 47. <sup>13</sup>C-NMR of 8c.

Description:  
 Ionization Mode:ESI+  
 History:Determine m/z[Peak Detect[Centroid,30,Area];Correct Base[];Smooth[5]];Correct Base[5.0%];Average[MS[...

Mass Calibration data:Cal\_PEG\_600  
 Created:2/3/2023 12:32:06 PM  
 Created by:AccuTOF

Charge number:1  
 Element:<sup>12</sup>C:0 .. 19, <sup>1</sup>H:0 .. 50, <sup>14</sup>N:0 .. 2, <sup>16</sup>O:0 .. 0

Tolerance:100.00(ppm), 5.00 .. 15.00(mmu)

Unsaturation Number:0.0 .. 50.0 (Fraction:.5)

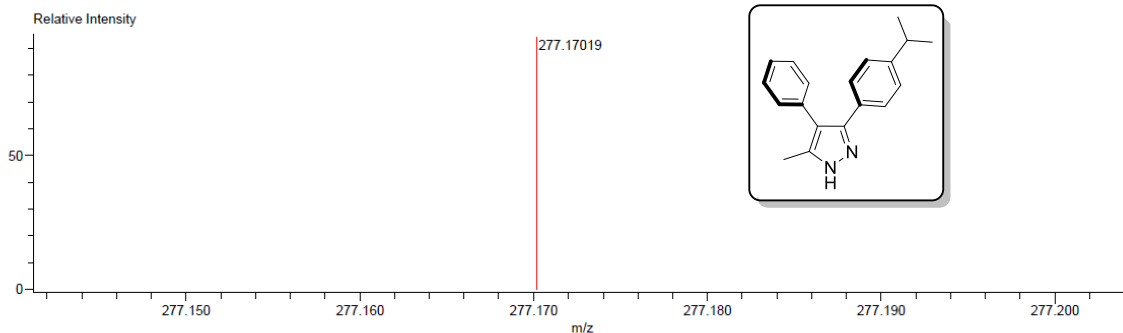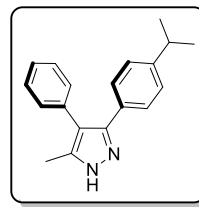

| Mass      | Intensity | Calc. Mass | Mass Difference (mmu) | Mass Difference (ppm) | Possible Formula                                                                        | Unsaturation Number |
|-----------|-----------|------------|-----------------------|-----------------------|-----------------------------------------------------------------------------------------|---------------------|
| 277.17019 | 3715.29   | 277.17047  | -0.28                 | -1.01                 | <sup>12</sup> C <sub>19</sub> <sup>1</sup> H <sub>21</sub> <sup>14</sup> N <sub>2</sub> | 10.5                |

Spectrum 48. HRMS of 8c.

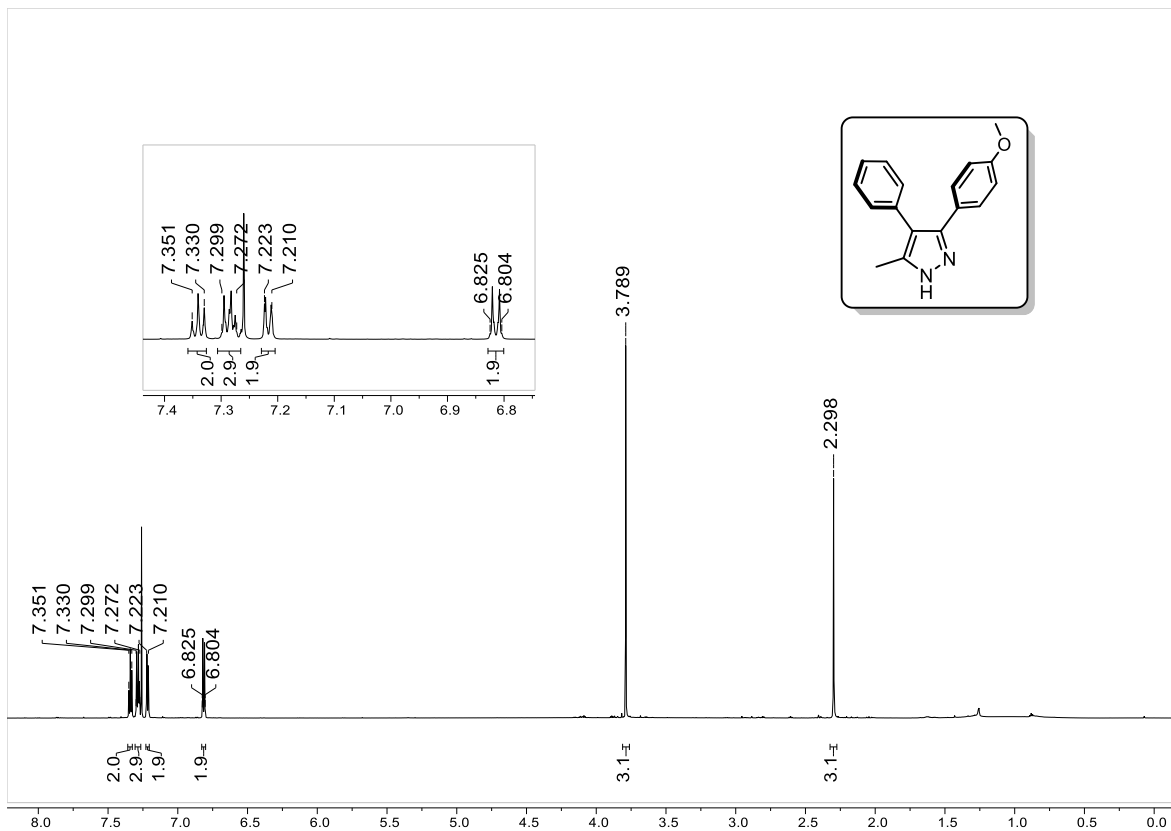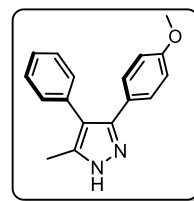

Spectrum 49. <sup>1</sup>H-NMR of 8d.

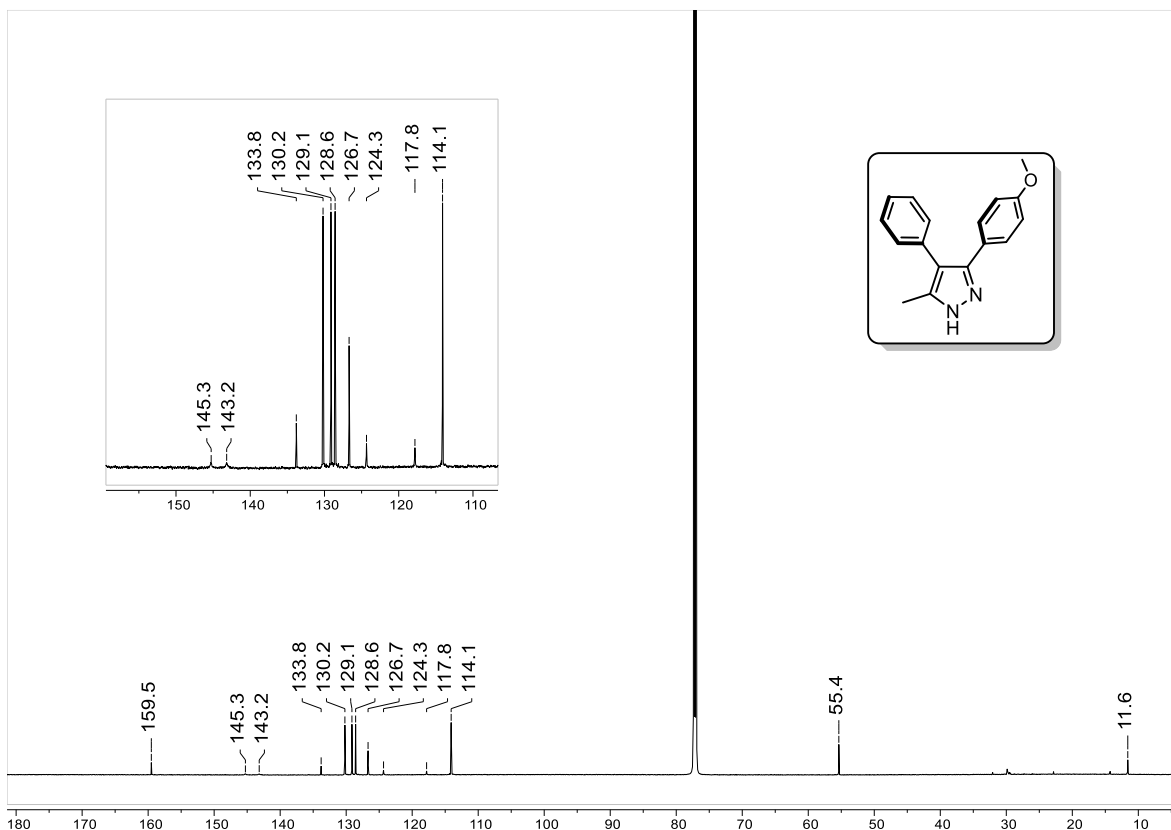

**Spectrum 50.**  $^{13}\text{C}$ -NMR of **8d**.

Description:  
 Ionization Mode: ESI+  
 History: Determine m/z [Peak Detect [Centroid, 30, Area], Correct Base[]; Smooth [5]]; Correct Base [5.0%]; Average [MS[...

Mass Calibration data: Cal\_PEG\_600  
 Created: 2/17/2023 11:40:57 AM  
 Created by: AccuTOF

Charge number: 1  
 Element:  $^{12}\text{C}$ : 0 .. 17,  $^1\text{H}$ : 0 .. 21,  $^{14}\text{N}$ : 0 .. 2,  $^{16}\text{O}$ : 0 .. 1

Tolerance: 5.00 (ppm), 5.00 .. 15.00 (mmu)

Unsaturation Number: 0.0 .. 50.0 (Fraction: Both)

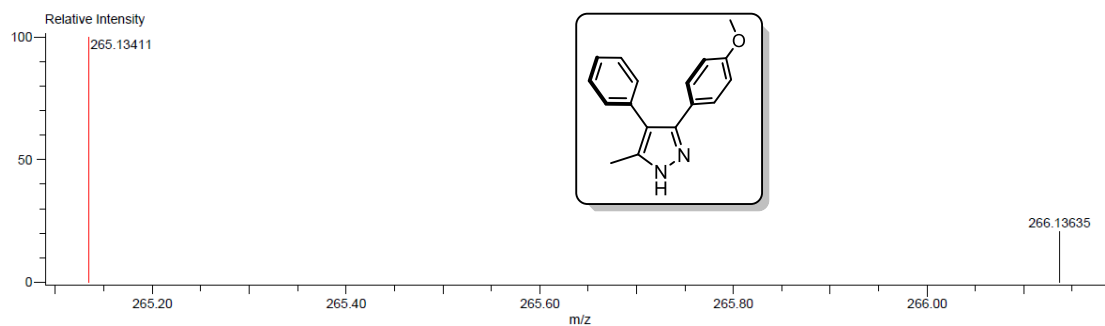

| Mass      | Intensity | Calc. Mass | Mass Difference (mmu) | Mass Difference (ppm) | Possible Formula                                      | Unsaturation Number |
|-----------|-----------|------------|-----------------------|-----------------------|-------------------------------------------------------|---------------------|
| 265.13411 | 13136.52  | 265.13409  | 0.02                  | 0.08                  | $^{12}\text{C}_{17}\text{H}_{17}\text{N}_2\text{O}_1$ | 10.5                |

**Spectrum 51.** HRMS of **8d**.

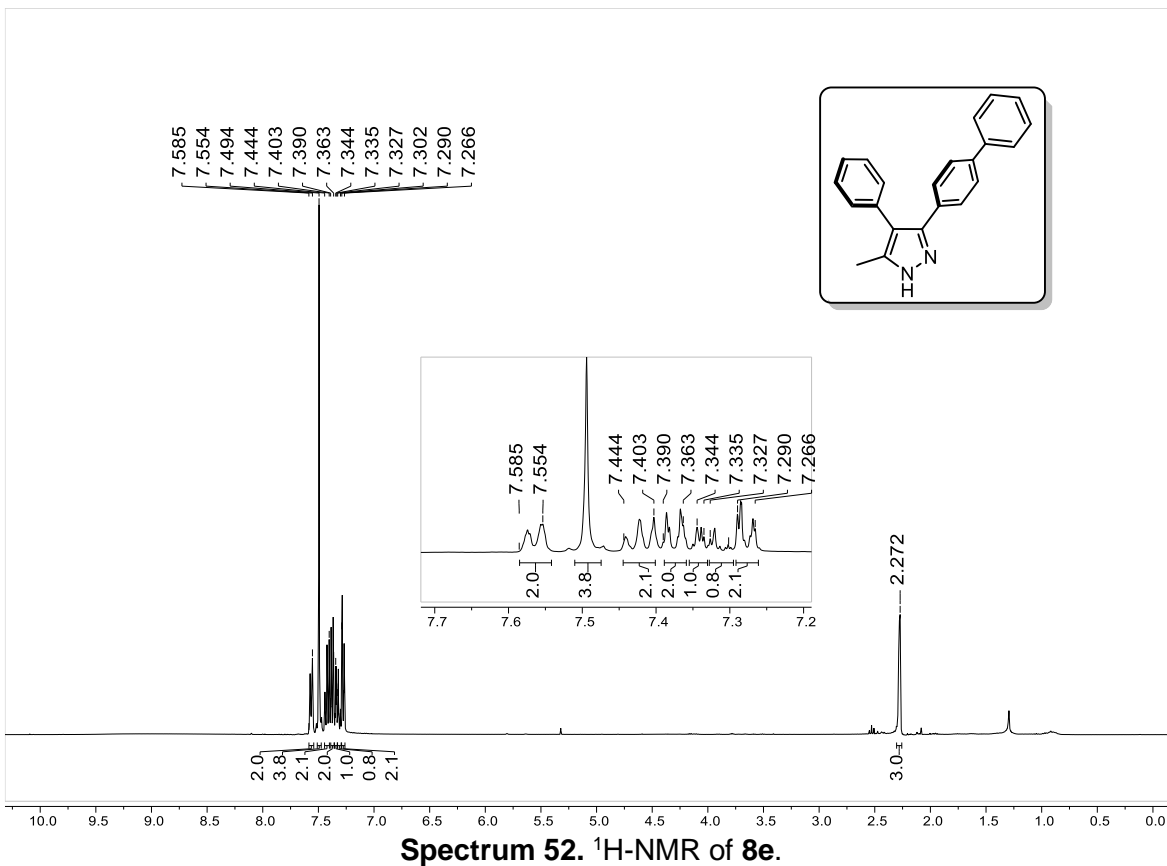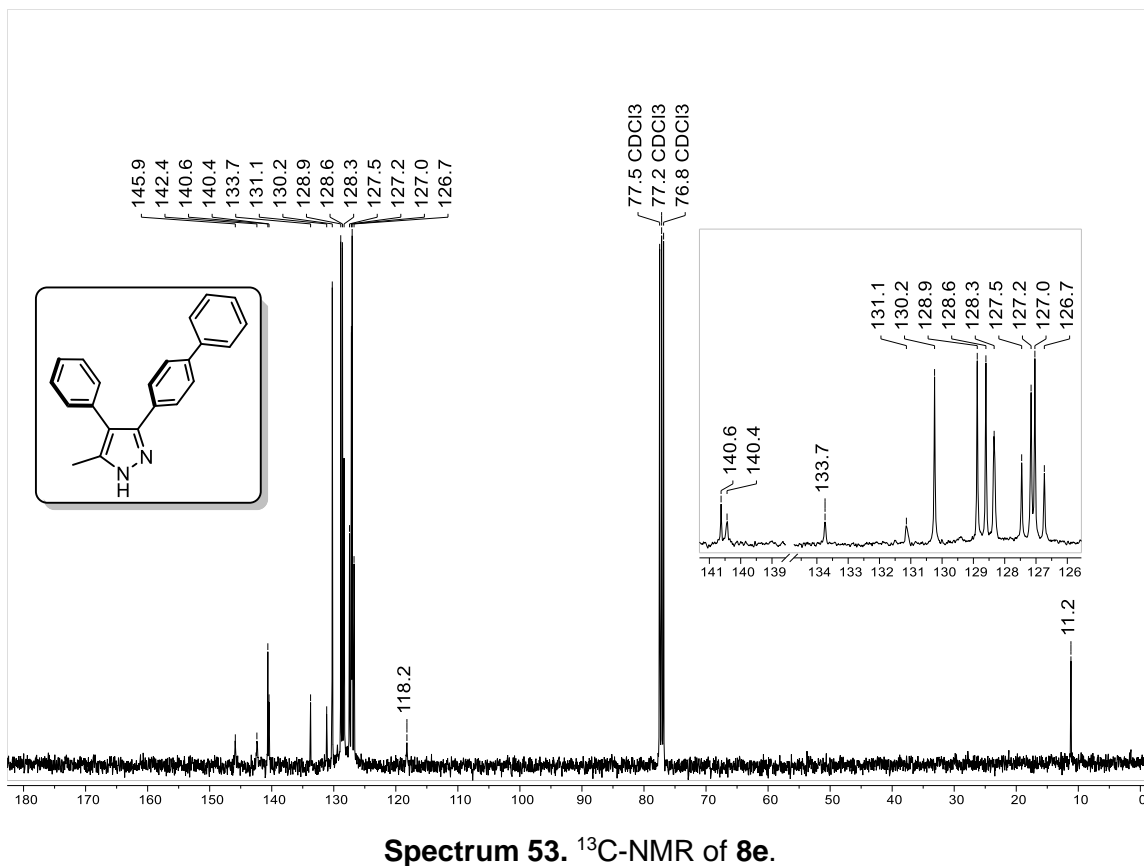

Description:  
 Ionization Mode:ESI+  
 History:Determine m/z[Peak Detect[Centroid,30,Area];Correct Base[];Smooth[5];Correct Base[5.0%];Average(MS[...]

Charge number:1  
 Element:<sup>12</sup>C:0 .. 22, <sup>1</sup>H:0 .. 50, <sup>19</sup>F:0 .. 0, <sup>14</sup>N:0 .. 2, <sup>16</sup>O:0 .. 0

Mass Calibration data:Cal\_PEG\_600  
 Created:2/2/2023 10:25:58 AM  
 Created by:AccuTOF

Tolerance:50.00(ppm), 5.00 .. 15.00(mmu)

Unsaturation Number:0.0 .. 50.0 (Fraction:.5)

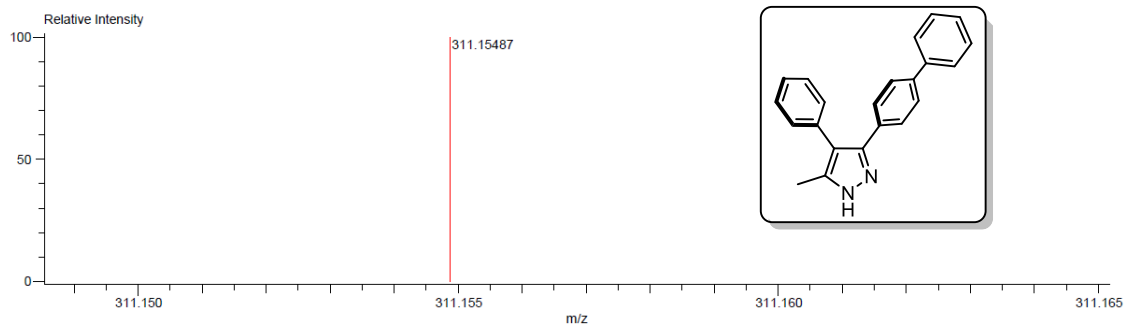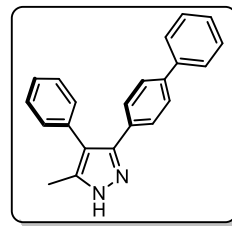

| Mass      | Intensity | Calc. Mass | Mass Difference (mmu) | Mass Difference (ppm) | Possible Formula                                                                        | Unsaturation Number |
|-----------|-----------|------------|-----------------------|-----------------------|-----------------------------------------------------------------------------------------|---------------------|
| 311.15487 | 265293.61 | 311.15482  | 0.05                  | 0.15                  | <sup>12</sup> C <sub>22</sub> <sup>1</sup> H <sub>19</sub> <sup>14</sup> N <sub>2</sub> | 14.5                |

**Spectrum 54. HRMS of 8e.**

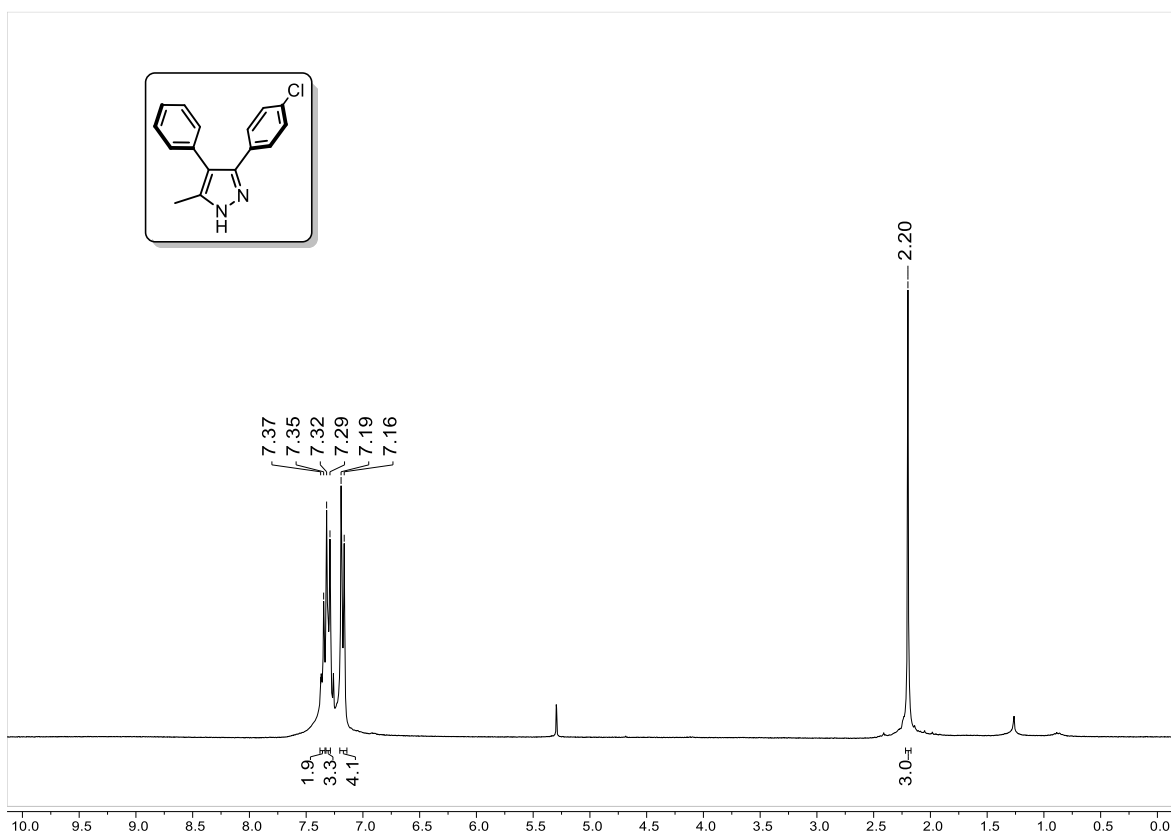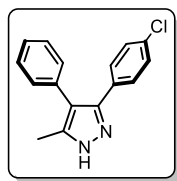

**Spectrum 55. <sup>1</sup>H-NMR of 8f.**

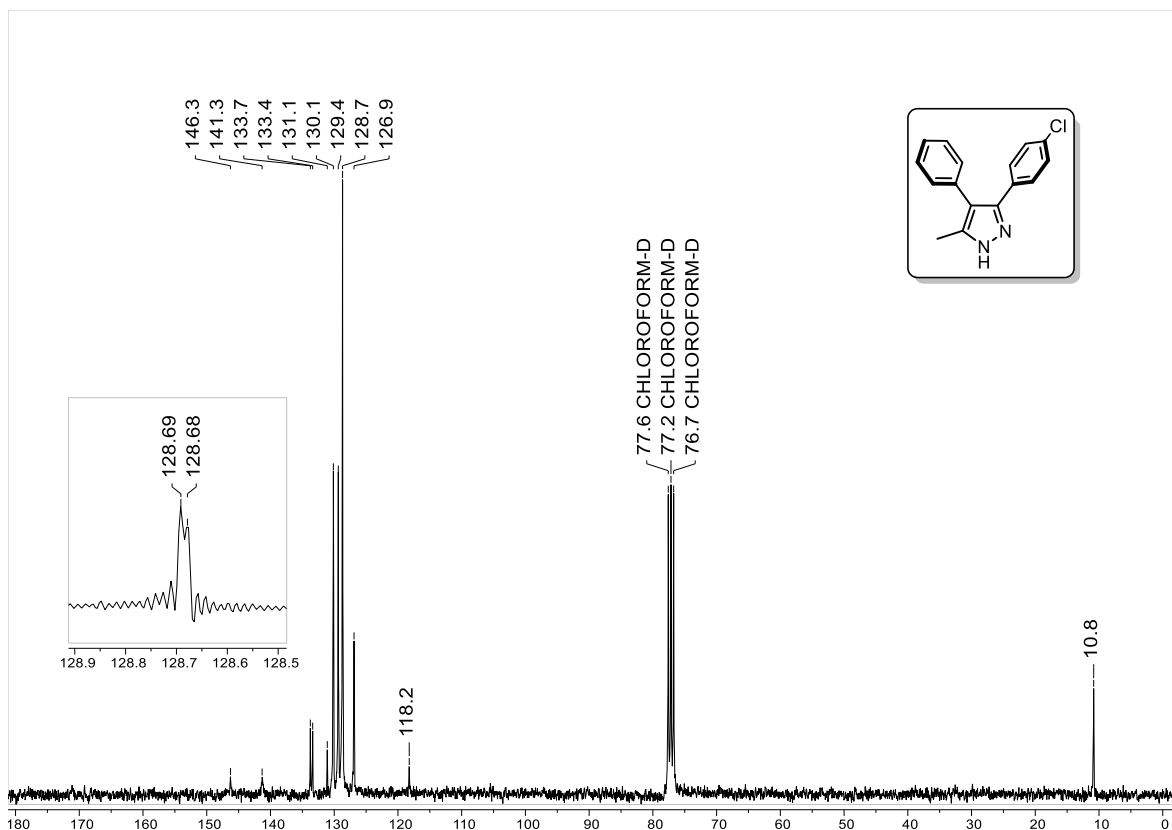

Spectrum 56. <sup>13</sup>C-NMR of 8f.

Description:

Ionization Mode:ESI+

History:Determine m/z[Peak Detect[Centroid,30,Area];Correct Base[];Smooth[5]];Correct Base[5.0%];Average[MS[...

Mass Calibration data:Cal\_PEG\_600

Created:2/3/2023 12:43:22 PM

Created by:AccuTOF

Charge number:1

Tolerance:100.00(ppm), 5.00 .. 15.00(mmu)

Unsaturation Number:0.0 .. 50.0 (Fraction:.5)

Element:<sup>12</sup>C:0 .. 19, <sup>1</sup>H:0 .. 50, <sup>35</sup>Cl:0 .. 1, <sup>19</sup>F:0 .. 0, <sup>14</sup>N:0 .. 2, <sup>16</sup>O:0 .. 0

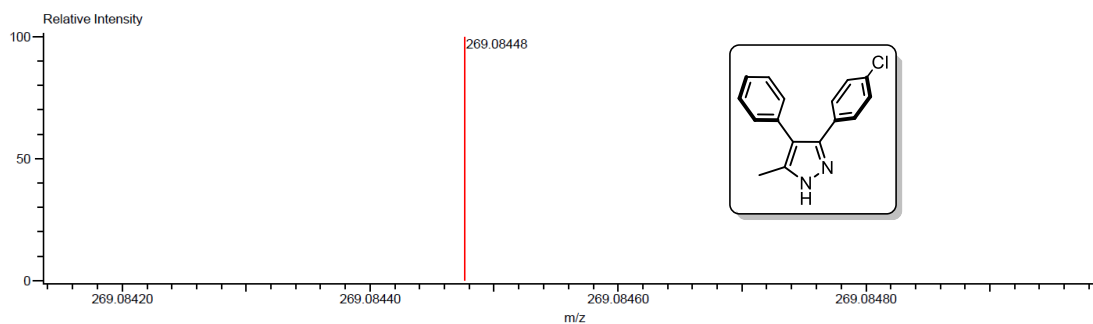

| Mass      | Intensity | Calc. Mass | Mass Difference (mmu) | Mass Difference (ppm) | Possible Formula                                                                                                      | Unsaturation Number |
|-----------|-----------|------------|-----------------------|-----------------------|-----------------------------------------------------------------------------------------------------------------------|---------------------|
| 269.08448 | 878215.03 | 269.08455  | -0.07                 | -0.28                 | <sup>12</sup> C <sub>16</sub> <sup>1</sup> H <sub>14</sub> <sup>35</sup> Cl <sub>1</sub> <sup>14</sup> N <sub>2</sub> | 10.5                |

Spectrum 57. HRMS of 8f.



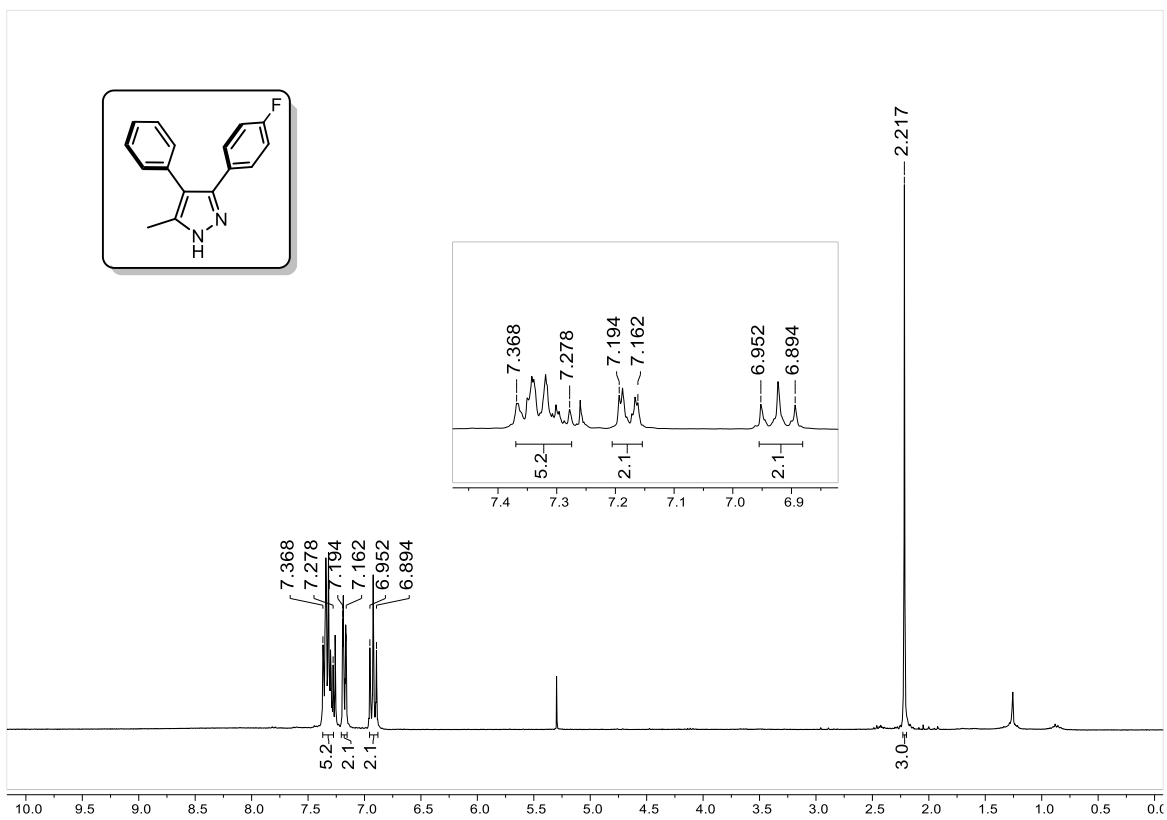

Spectrum 58. <sup>1</sup>H-NMR of 8g.

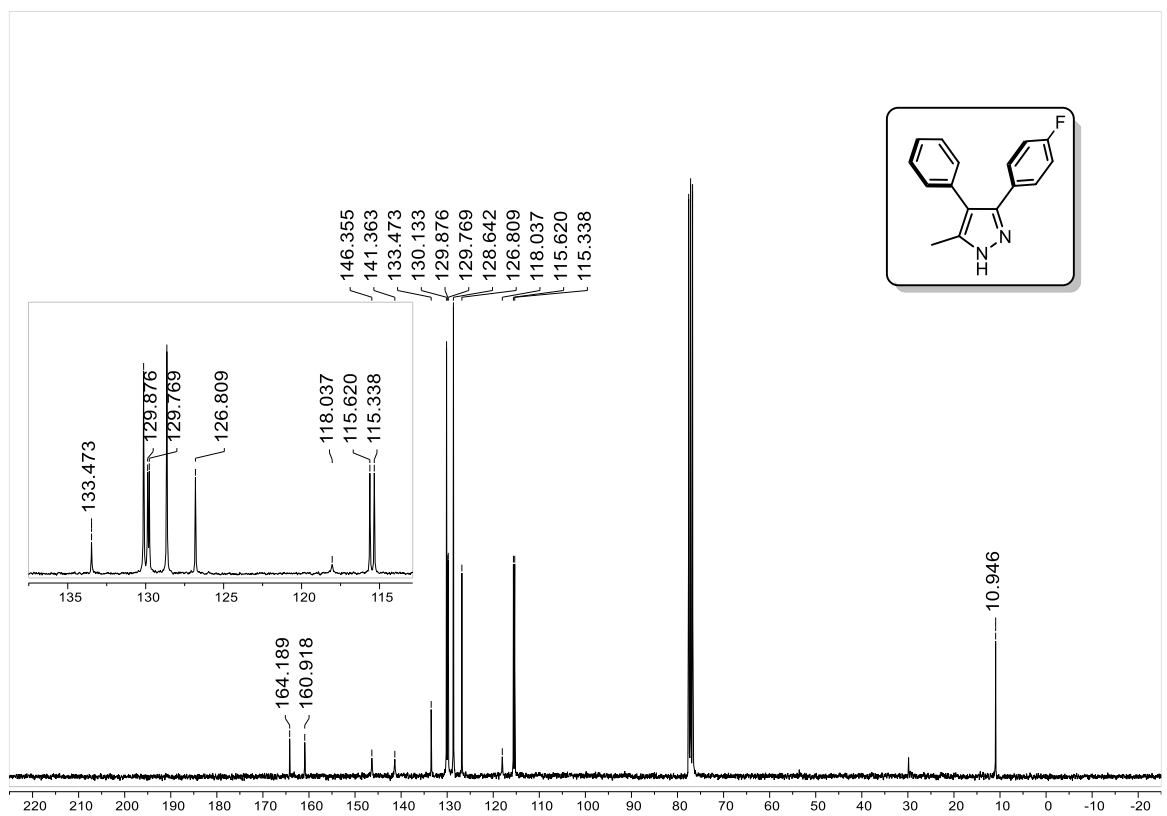

Spectrum 59. <sup>13</sup>C-NMR of 8g.

Description:  
 Ionization Mode:ESI+  
 History:Determine m/z[Peak Detect[Centroid,30,Area],Correct Base[],Smooth[5]],Correct Base[5.0%],Average(MS[...

Mass Calibration data:Cal\_PEG\_600  
 Created:2/15/2023 11:15:26 AM  
 Created by:

Charge number:1  
 Element:<sup>12</sup>C:0 .. 16, <sup>1</sup>H:0 .. 22, <sup>35</sup>Cl:0 .. 0, <sup>19</sup>F:0 .. 1, <sup>14</sup>N:0 .. 2, <sup>16</sup>O:0 .. 0  
 Tolerance:100.00(mmu)

Unsaturation Number:0.0 .. 20.0 (Fraction:Both)

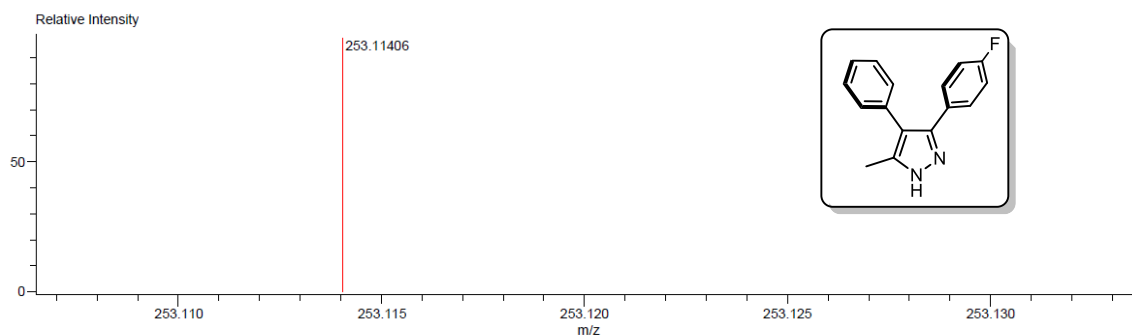

| Mass      | Intensity | Calc. Mass | Mass Difference (mmu) | Mass Difference (ppm) | Possible Formula                                                                                                     | Unsaturation Number |
|-----------|-----------|------------|-----------------------|-----------------------|----------------------------------------------------------------------------------------------------------------------|---------------------|
| 253.11406 | 762947.17 | 253.11410  | -0.04                 | -0.17                 | <sup>12</sup> C <sub>16</sub> <sup>1</sup> H <sub>14</sub> <sup>19</sup> F <sub>1</sub> <sup>14</sup> N <sub>2</sub> | 10.5                |

**Spectrum 60. HRMS of 8g.**

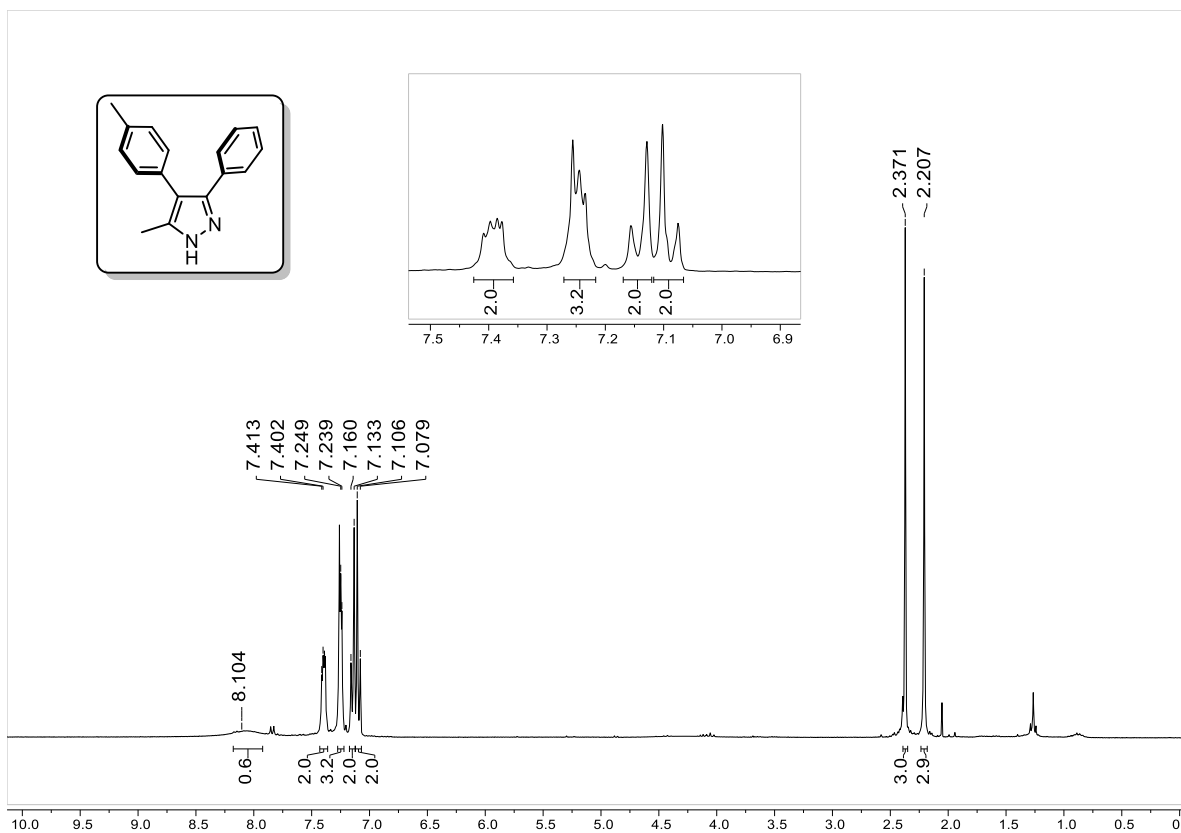

**Spectrum 61. <sup>1</sup>H-NMR of 8h.**

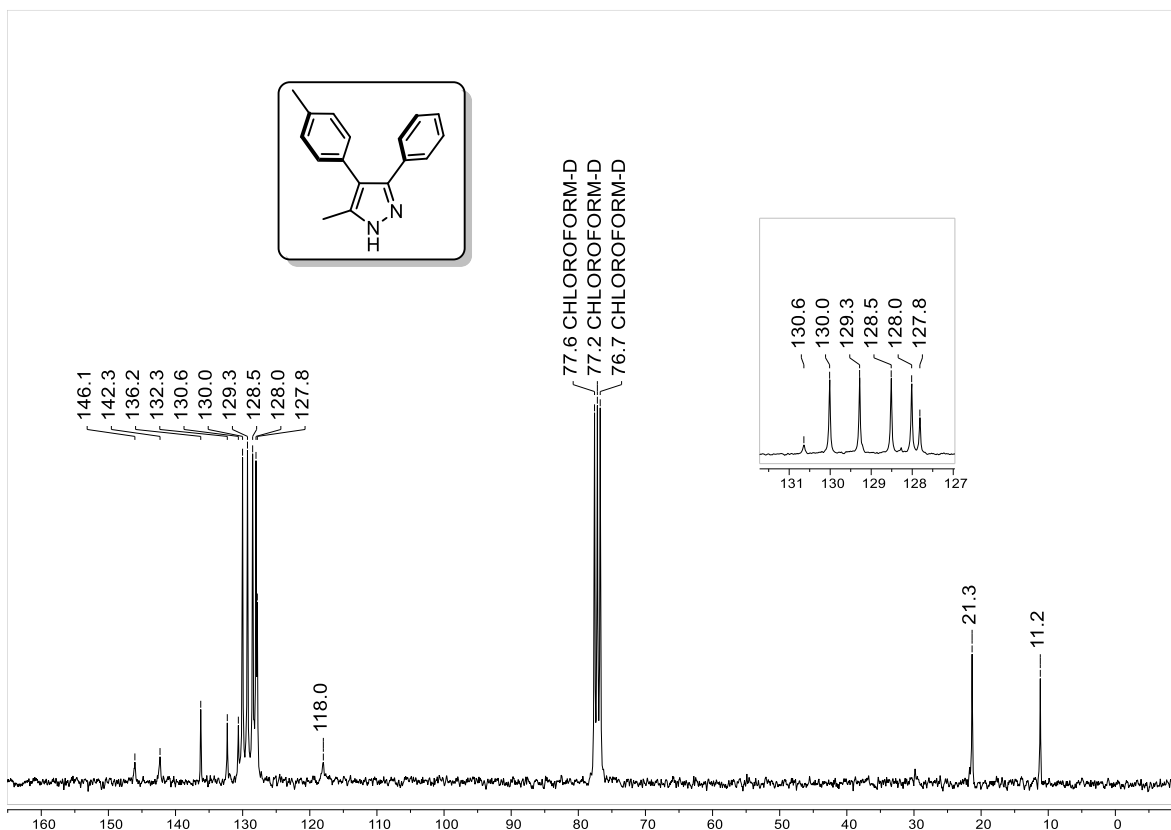

**Spectrum 62.**  $^{13}\text{C}$ -NMR of **8h**.

Description:  
 Ionization Mode:ESI+

History:Determine m/z[Peak Detect[Centroid,30,Area];Correct Base[];Smooth[5]];Correct Base[5.0%];Average[MS[...

Mass Calibration data:Cal\_PEG\_600  
 Created:1/24/2023 2:20:24 PM  
 Created by:AccuTOF

Charge number:1  
 Tolerance:5.00(ppm), 5.00 .. 15.00(mmu)  
 Element: $^{12}\text{C}$ :0 .. 17,  $^1\text{H}$ :0 .. 20,  $^{35}\text{Cl}$ :0 .. 0,  $^{14}\text{N}$ :0 .. 2,  $^{16}\text{O}$ :0 .. 0

Unsaturation Number:0.0 .. 45.0 (Fraction:Both)

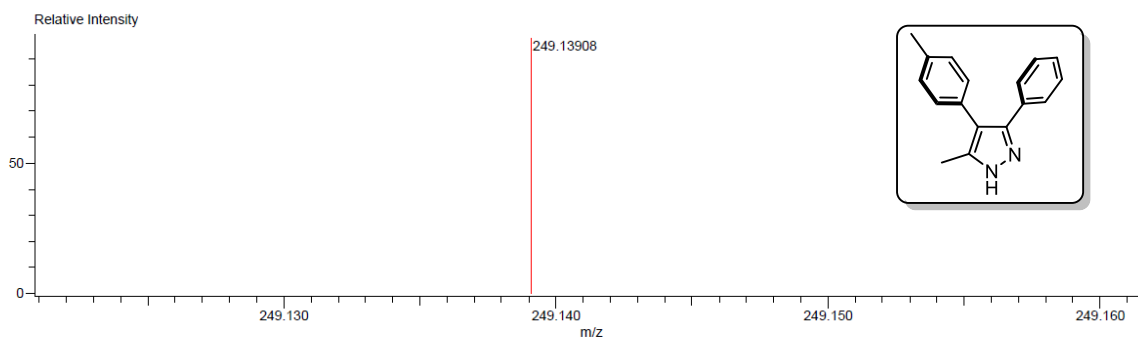

| Mass      | Intensity | Calc. Mass | Mass Difference (mmu) | Mass Difference (ppm) | Possible Formula                            | Unsaturation Number |
|-----------|-----------|------------|-----------------------|-----------------------|---------------------------------------------|---------------------|
| 249.13908 | 3737.98   | 249.13917  | -0.09                 | -0.37                 | $^{12}\text{C}_{17}\text{H}_{17}\text{N}_2$ | 10.5                |

**Spectrum 63.** HRMS of **8h**.

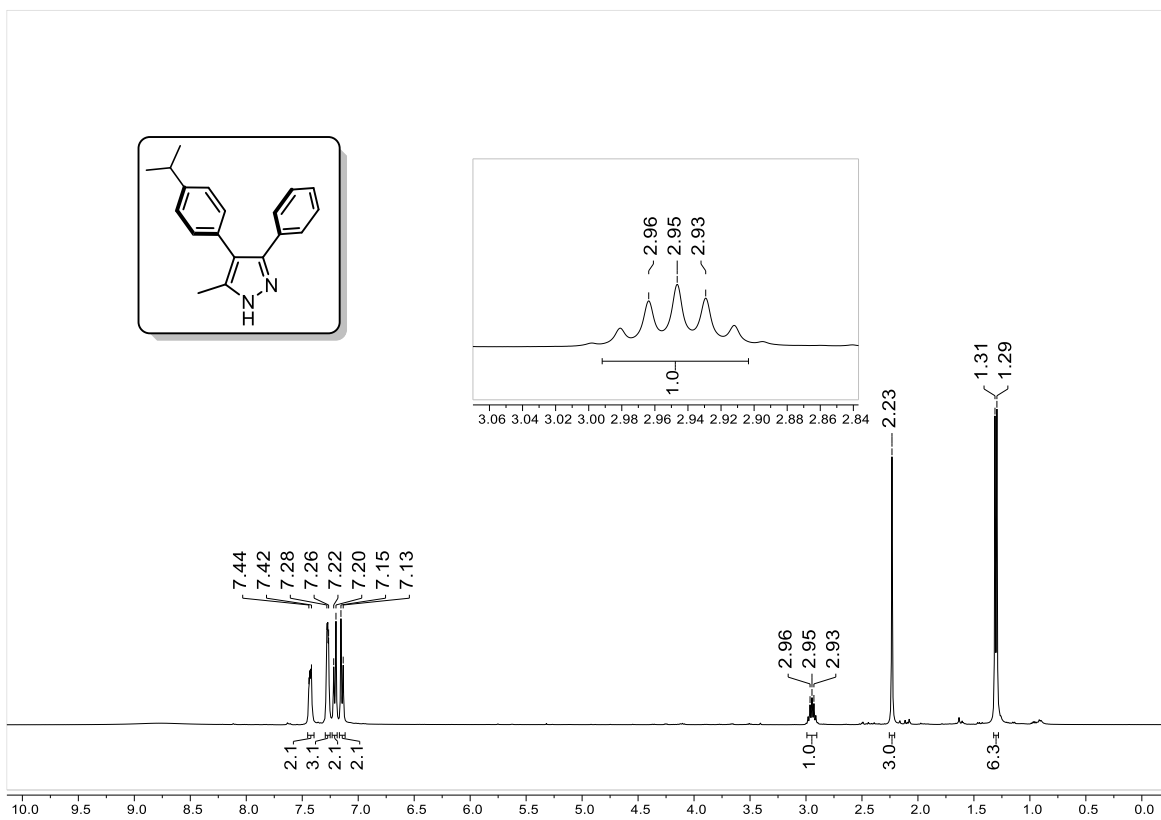

Spectrum 64. <sup>1</sup>H-NMR of 8i.

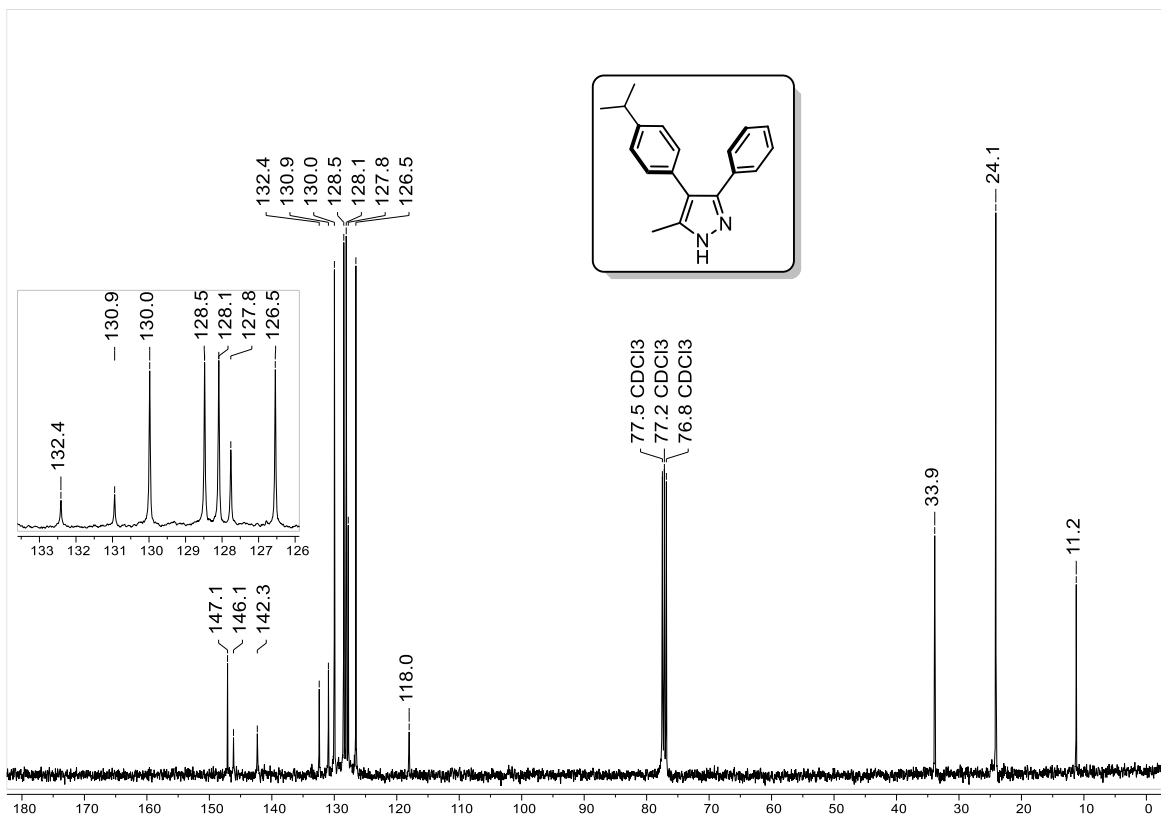

Spectrum 65. <sup>13</sup>C-NMR of 8i.

Description:  
 Ionization Mode:ESI+  
 History:Determine m/z[Peak Detect[Centroid,30,Area];Correct Base[];Smooth[5];Correct Base[5.0%];Average[MS[...

Mass Calibration data:Cal\_PEG\_600  
 Created:2/17/2023 11:37:13 AM  
 Created by:AccuTOF

Charge number:1 Tolerance:5.00(ppm), 5.00 .. 15.00(mmu) Unsaturation Number:0.0 .. 50.0 (Fraction:Both)  
 Element:<sup>12</sup>C:0 .. 19, <sup>1</sup>H:0 .. 21, <sup>14</sup>N:0 .. 2, <sup>16</sup>O:0 .. 0

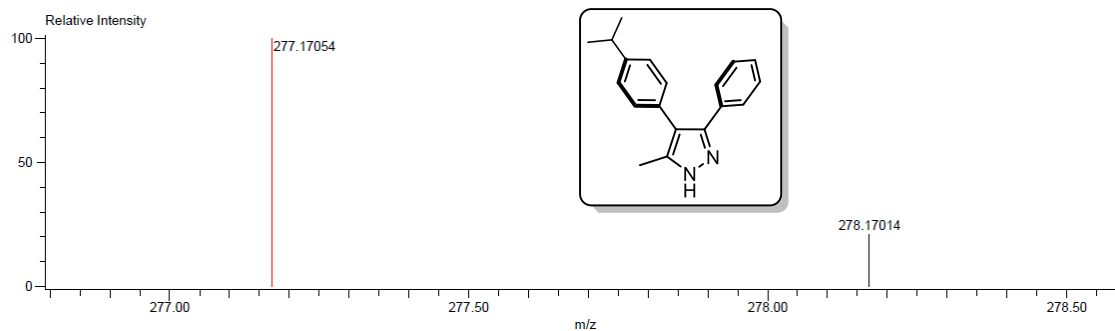

| Mass      | Intensity | Calc. Mass | Mass Difference (mmu) | Mass Difference (ppm) | Possible Formula                                                                        | Unsaturation Number |
|-----------|-----------|------------|-----------------------|-----------------------|-----------------------------------------------------------------------------------------|---------------------|
| 277.17054 | 8995.62   | 277.17047  | 0.07                  | 0.24                  | <sup>12</sup> C <sub>19</sub> <sup>1</sup> H <sub>21</sub> <sup>14</sup> N <sub>2</sub> | 10.5                |

**Spectrum 66. HRMS of 8i.**

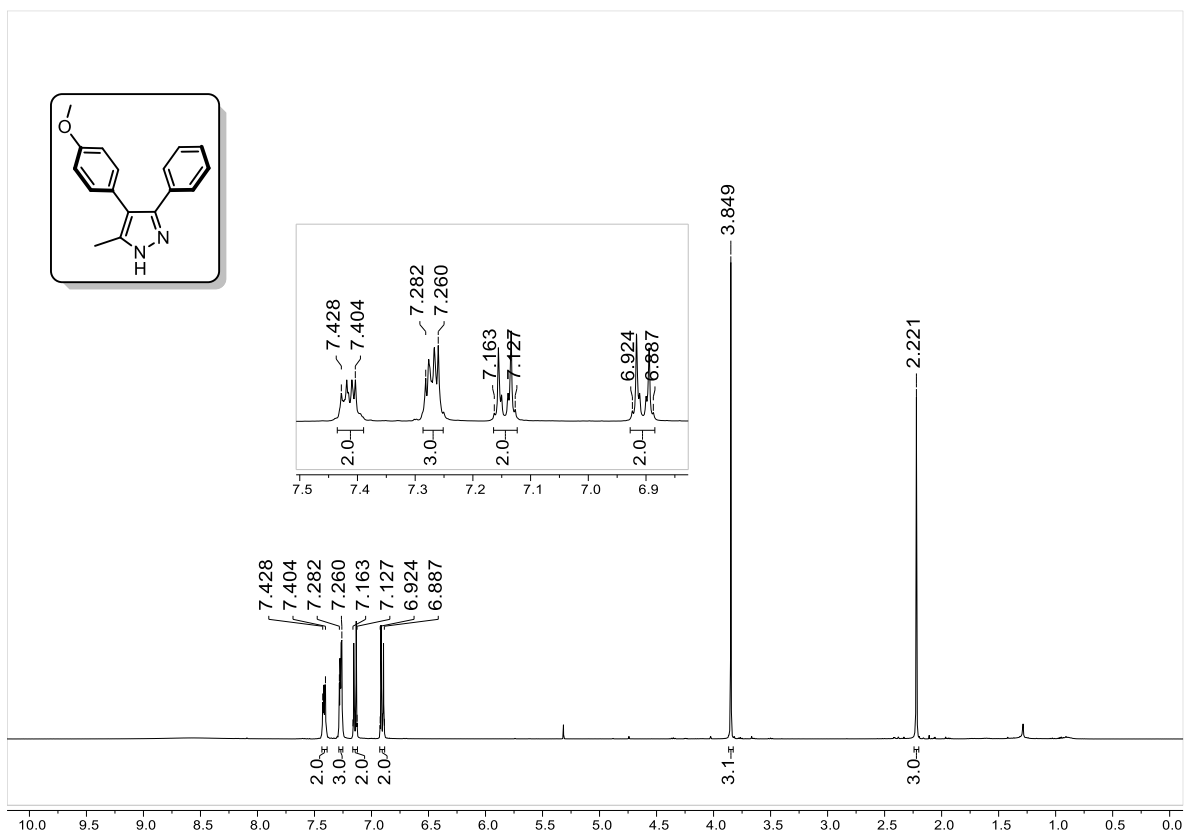

**Spectrum 67. <sup>1</sup>H-NMR of 8j.**

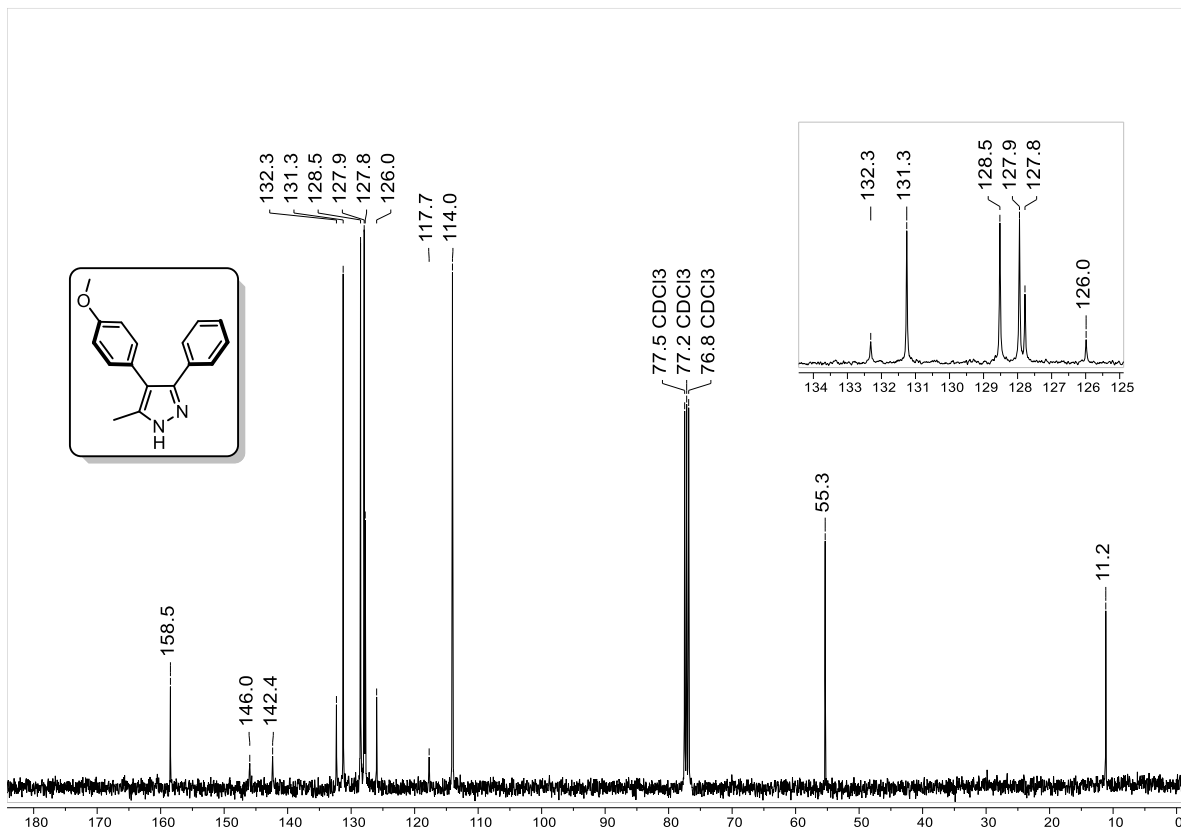

**Spectrum 68. <sup>13</sup>C-NMR of 8j.**

Description:

Ionization Mode:ESI+

History:Determine m/z[Peak Detect[Centroid,30,Area],Correct Base[],Smooth[5]],Correct Base[5.0%];Average[MS[...

Mass Calibration data:CaI\_PEG\_600

Created:2/23/2023 12:48:51 PM

Created by:AccuTOF

Charge number:1

Tolerance:4.00(ppm), 5.00 .. 15.00(mmu)

Unsaturation Number:0.0 .. 40.0 (Fraction:Both)

Element:<sup>12</sup>C:0 .. 17, <sup>1</sup>H:0 .. 18, <sup>14</sup>N:0 .. 2, <sup>16</sup>O:0 .. 1

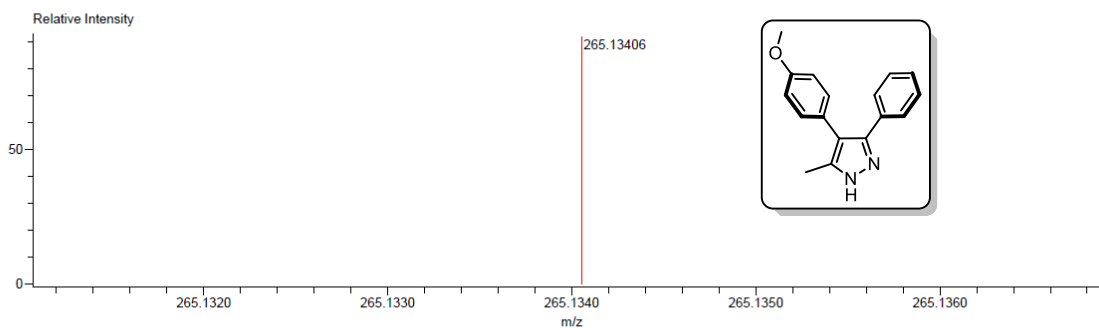

| Mass      | Intensity | Calc. Mass | Mass Difference (mmu) | Mass Difference (ppm) | Possible Formula                                                                                                     | Unsaturation Number |
|-----------|-----------|------------|-----------------------|-----------------------|----------------------------------------------------------------------------------------------------------------------|---------------------|
| 265.13406 | 3779.12   | 265.13409  | -0.03                 | -0.12                 | <sup>12</sup> C <sub>17</sub> <sup>1</sup> H <sub>17</sub> <sup>14</sup> N <sub>2</sub> <sup>16</sup> O <sub>1</sub> | 10.5                |

**Spectrum 69. HRMS of 8j.**

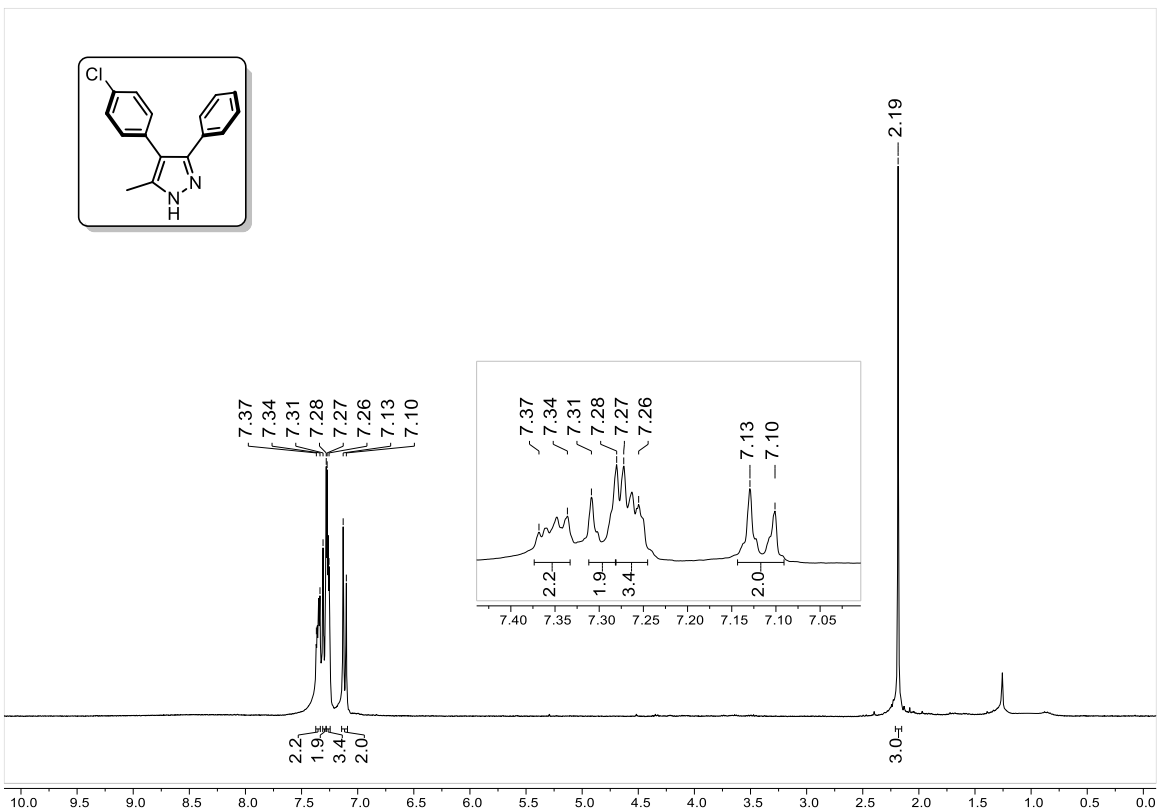

Spectrum 70.  $^1\text{H-NMR}$  of 8k.

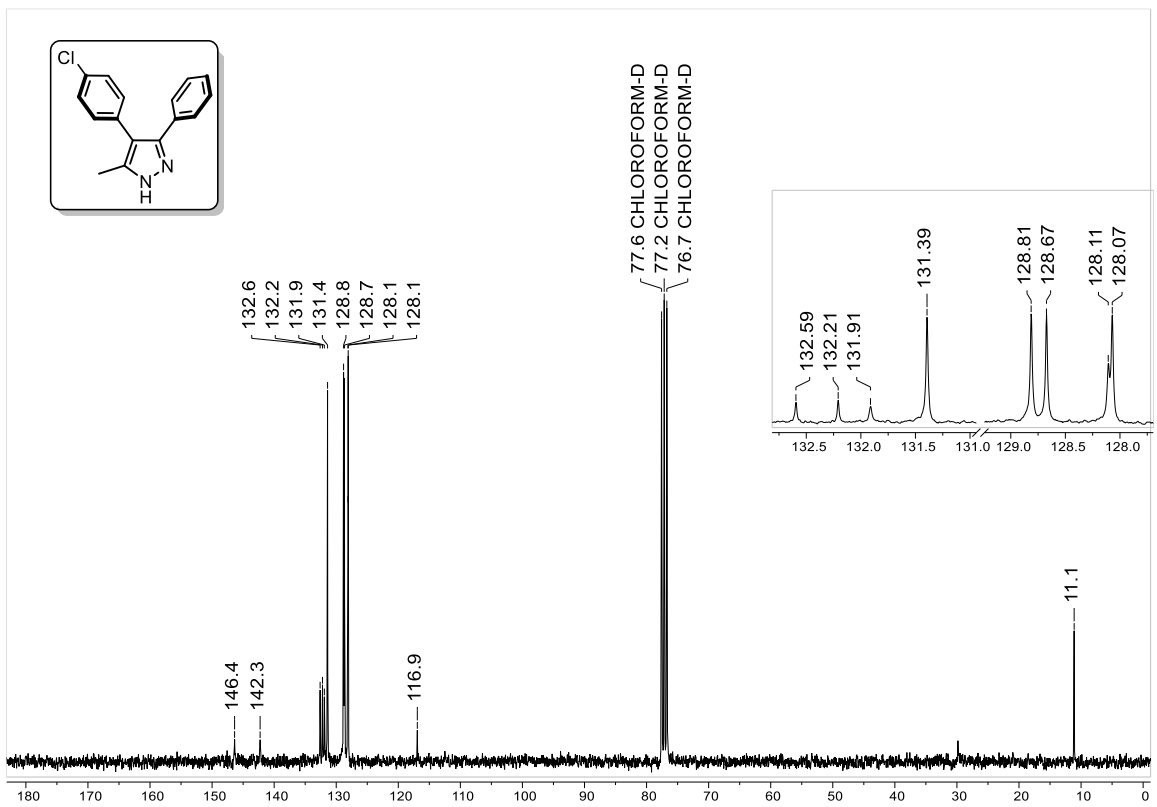

Spectrum 71.  $^{13}\text{C-NMR}$  of 8k.

Ionization Mode:ESI+

History:Determine m/z[Peak Detect[Centroid,30,Area],Correct Base[],Smooth[5]],Correct Base[5.0%];Average[MS[...

Created:1/25/2023 10:56:47 AM

Created by:AccuTOF

Charge number:1

Tolerance:3.00(ppm), 5.00 .. 15.00(mmu)

Unsaturation Number:0.0 .. 45.0 (Fraction:Both)

Element:<sup>12</sup>C:0 .. 16, <sup>1</sup>H:0 .. 20, <sup>35</sup>Cl:0 .. 1, <sup>14</sup>N:0 .. 2, <sup>16</sup>O:0 .. 0

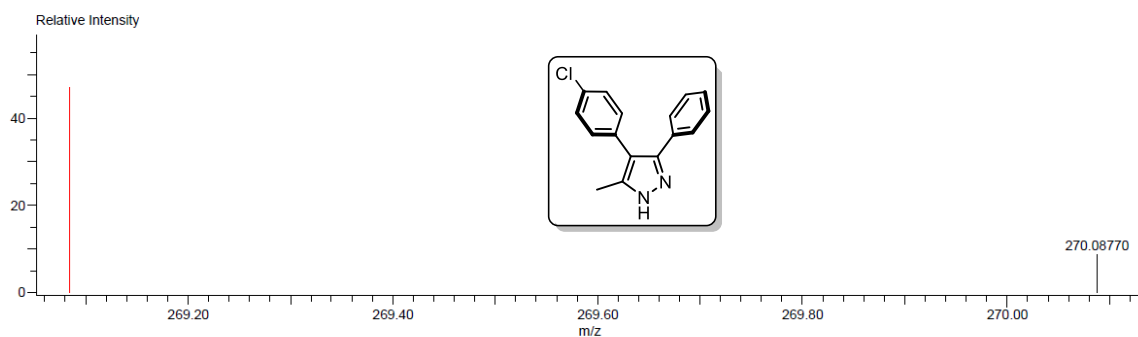

| Mass      | Intensity | Calc. Mass | Mass Difference (mmu) | Mass Difference (ppm) | Possible Formula                                                                                                      | Unsaturation Number |
|-----------|-----------|------------|-----------------------|-----------------------|-----------------------------------------------------------------------------------------------------------------------|---------------------|
| 269.08460 | 6551.40   | 269.08455  | 0.05                  | 0.18                  | <sup>12</sup> C <sub>16</sub> <sup>1</sup> H <sub>14</sub> <sup>35</sup> Cl <sub>1</sub> <sup>14</sup> N <sub>2</sub> | 10.5                |

Spectrum 72. HRMS of 8k.

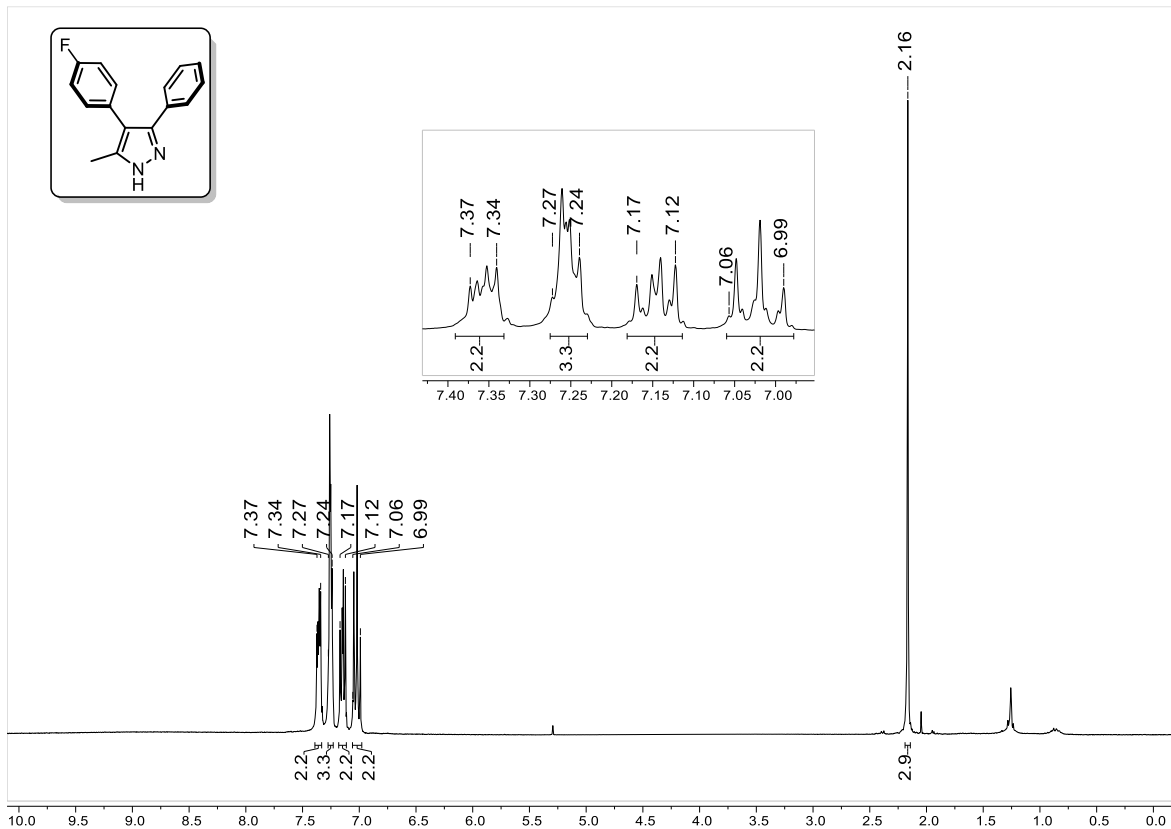

Spectrum 73. <sup>1</sup>H-NMR of 8l.



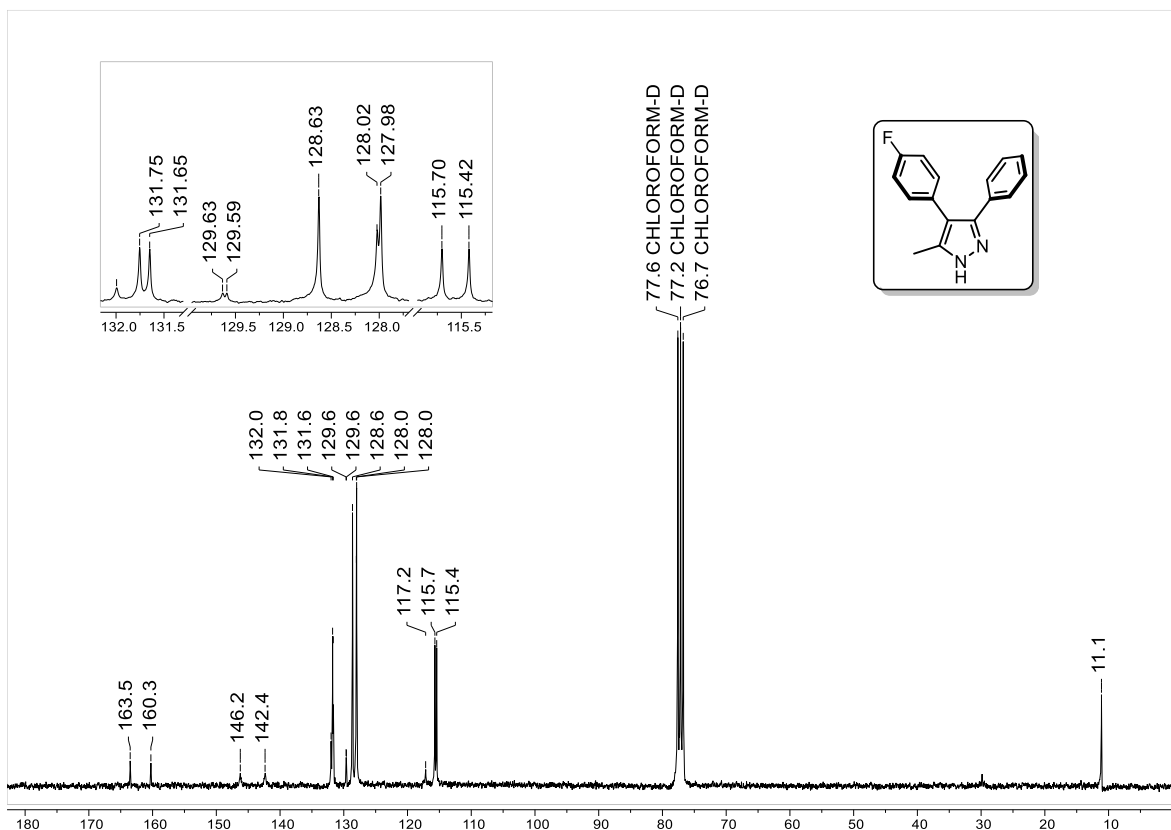

**Spectrum 74. <sup>13</sup>C-NMR of 8I.**

Description:

Ionization Mode:ESI+

History:Determine m/z[Peak Detect[Centroid,30,Area];Correct Base[];Smooth[5]];Correct Base[5.0%];Average[MS[...

Mass Calibration data:Cal\_PEG\_600

Created:2/3/2023 12:41:09 PM

Created by:AccuTOF

Charge number:1

Tolerance:100.00(ppm), 5.00 .. 15.00(mmu)

Unsaturation Number:0.0 .. 50.0 (Fraction:.5)

Element:<sup>12</sup>C:0 .. 19, <sup>1</sup>H:0 .. 50, <sup>19</sup>F:0 .. 1, <sup>14</sup>N:0 .. 2, <sup>18</sup>O:0 .. 0

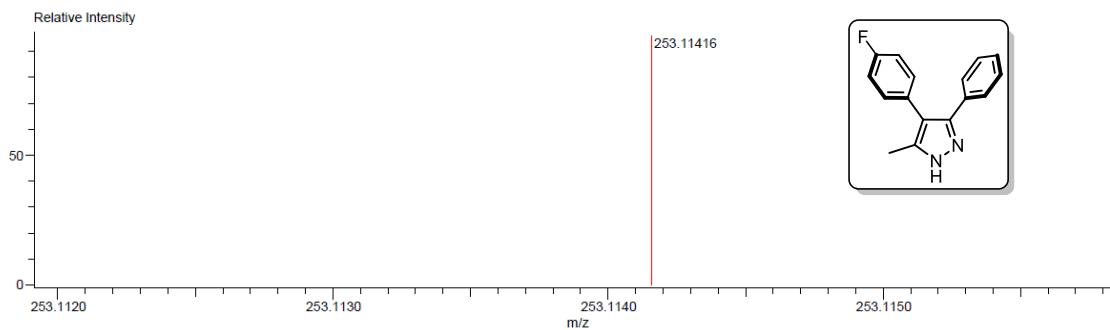

| Mass      | Intensity | Calc. Mass | Mass Difference (mmu) | Mass Difference (ppm) | Possible Formula                                                                                                     | Unsaturation Number |
|-----------|-----------|------------|-----------------------|-----------------------|----------------------------------------------------------------------------------------------------------------------|---------------------|
| 253.11416 | 844768.97 | 253.11410  | 0.06                  | 0.23                  | <sup>12</sup> C <sub>16</sub> <sup>1</sup> H <sub>14</sub> <sup>19</sup> F <sub>1</sub> <sup>14</sup> N <sub>2</sub> | 10.5                |

**Spectrum 75. HRMS of 8I.**

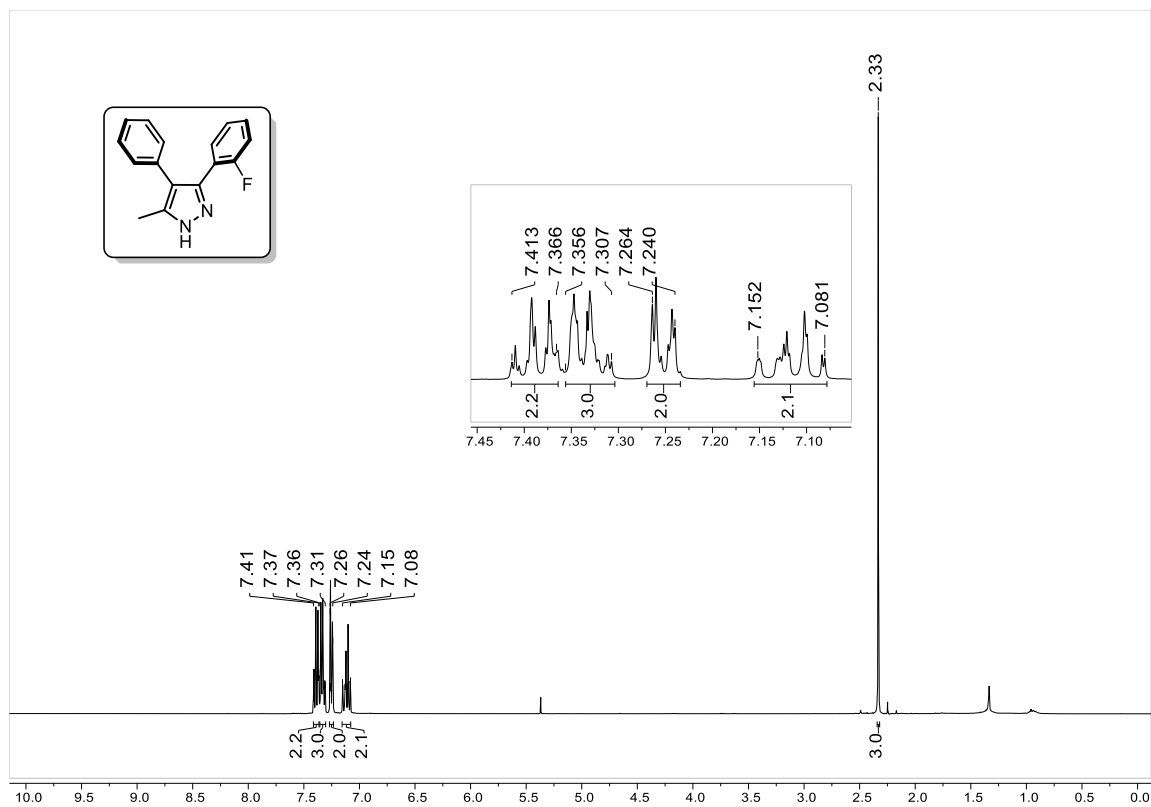

Spectrum 76. <sup>1</sup>H-NMR of 8m.

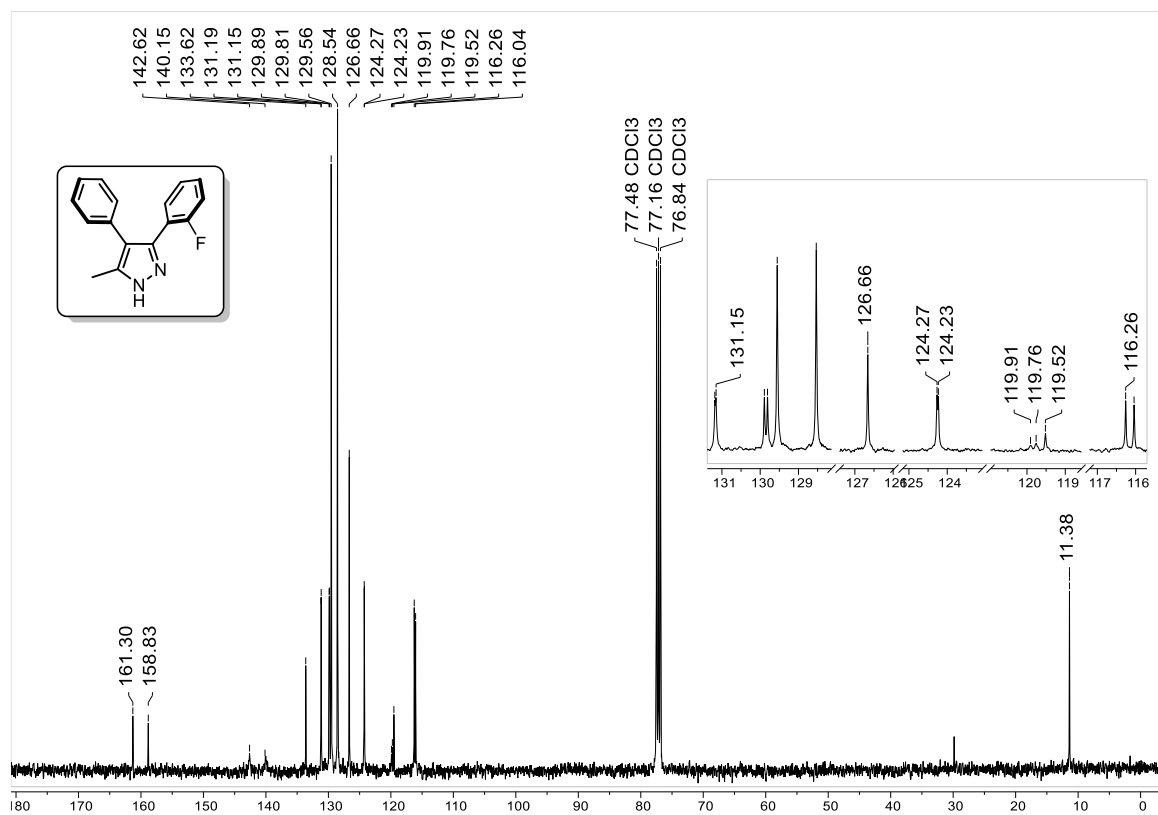

Spectrum 77. <sup>13</sup>C-NMR of 8m.

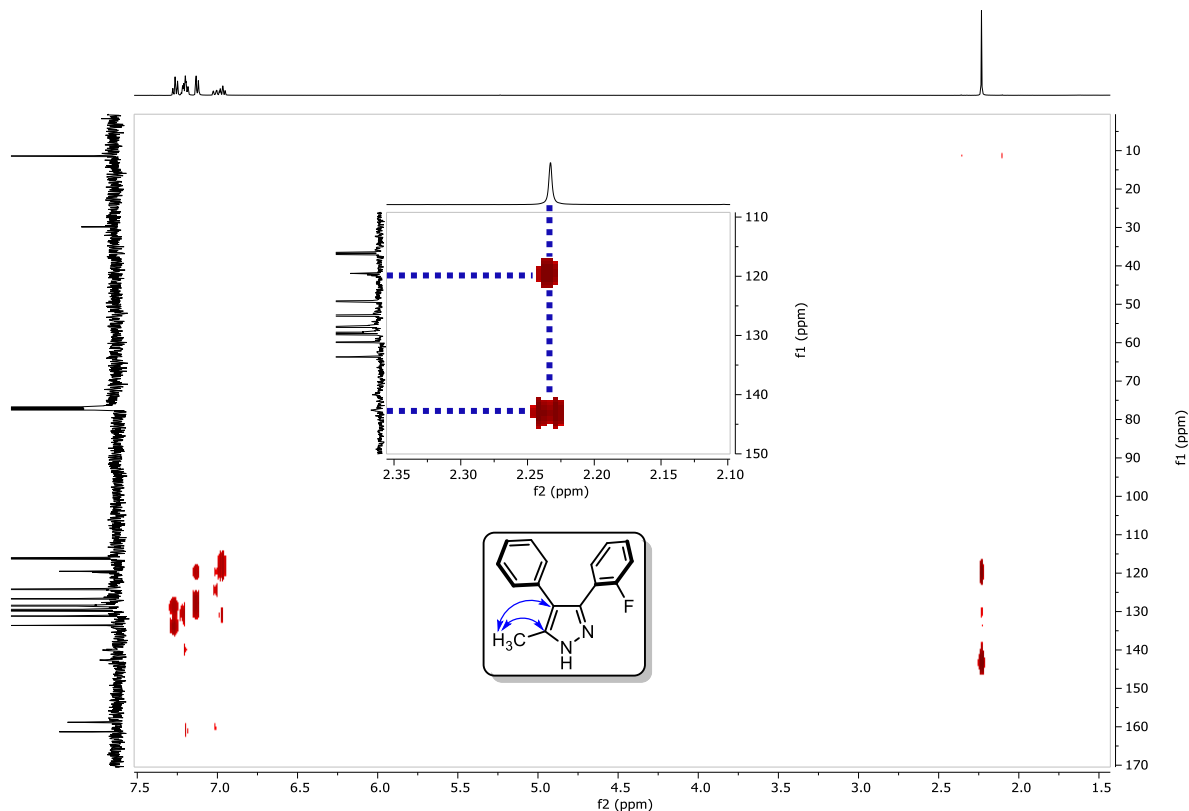

**Spectrum 78. HMBC of 8m.**

Description:  
Ionization Mode:ESI+

History:Determine m/z[Peak Detect[Centroid,30,Area];Correct Base[];Smooth[5]];Correct Base[5.0%];Average[MS[...

Mass Calibration data:CaI\_PEG\_600

Created:3/10/2023 9:36:56 AM

Created by:AccuTOF

Charge number:1

Tolerance:50.00(ppm), 5.00 .. 15.00(mmu)

Unsaturation Number:0.0 .. 50.0 (Fraction:Both)

Element:<sup>12</sup>C:0 .. 16, <sup>1</sup>H:0 .. 50, <sup>35</sup>Cl:0 .. 0, <sup>19</sup>F:0 .. 1, <sup>14</sup>N:0 .. 2, <sup>16</sup>O:0 .. 0, <sup>32</sup>S:0 .. 0

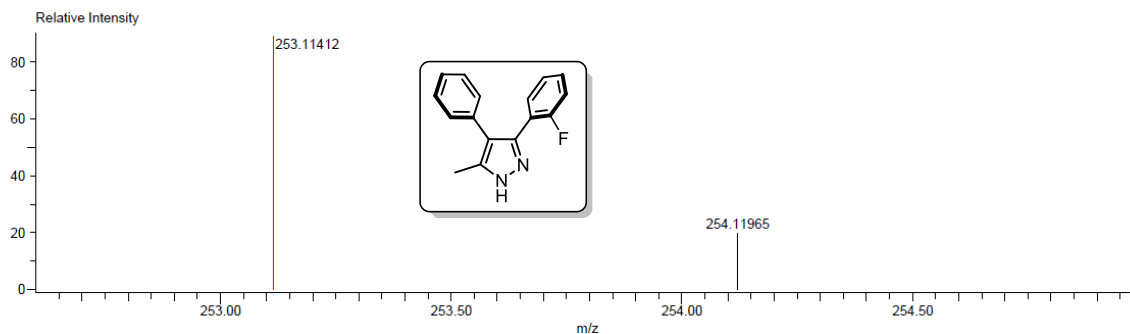

| Mass      | Intensity | Calc. Mass | Mass Difference (mmu) | Mass Difference (ppm) | Possible Formula                                                                                                     | Unsaturation Number |
|-----------|-----------|------------|-----------------------|-----------------------|----------------------------------------------------------------------------------------------------------------------|---------------------|
| 253.11412 | 14151.66  | 253.11410  | 0.02                  | 0.06                  | <sup>12</sup> C <sub>16</sub> <sup>1</sup> H <sub>14</sub> <sup>19</sup> F <sub>1</sub> <sup>14</sup> N <sub>2</sub> | 10.5                |

**Spectrum 79. HRMS of 8m.**

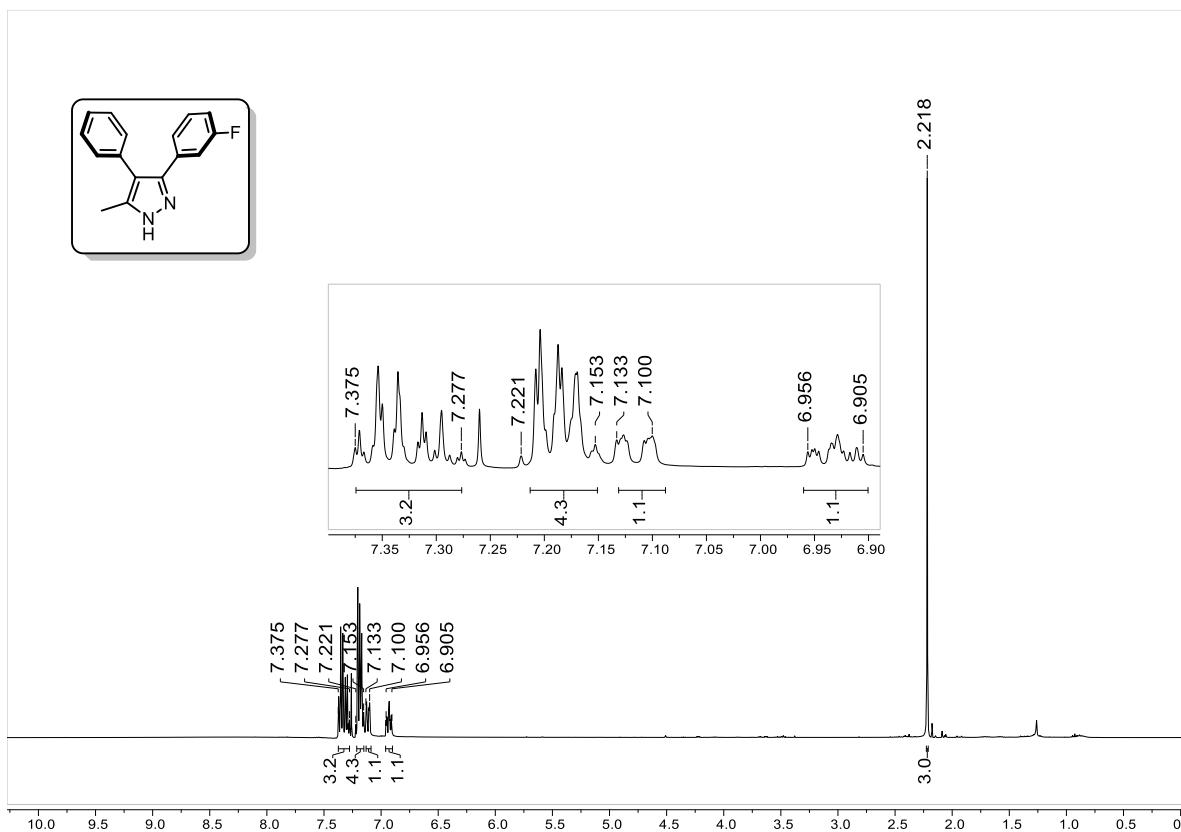

Spectrum 80. <sup>1</sup>H-NMR of 8n.

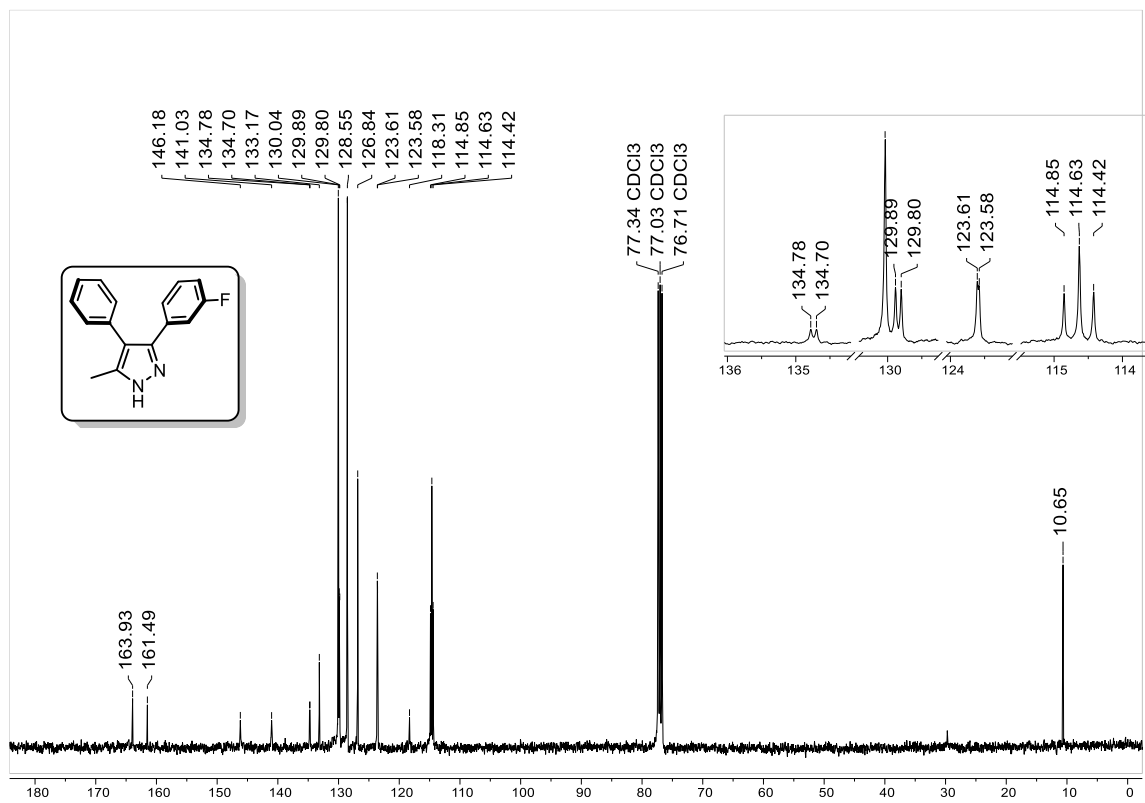

Spectrum 81. <sup>13</sup>C-NMR of 8n.

Description:  
 Ionization Mode: ESI+  
 History: Determine m/z [Peak Detect [Centroid, 30, Area], Correct Base [], Smooth [5]], Correct Base [5.0%], Average (MS...  
 Charge number: 1  
 Element: <sup>12</sup>C: 0 .. 16, <sup>1</sup>H: 0 .. 20, <sup>35</sup>Cl: 0 .. 1, <sup>19</sup>F: 1 .. 1, <sup>14</sup>N: 2 .. 2

Mass Calibration data: Cal\_PEG\_600  
 Created: 2/27/2023 2:14:34 PM  
 Created by: AccuTOF  
 Tolerance: 200.00 (ppm), 5.00 .. 15.00 (mmu)  
 Unsaturation Number: 0.0 .. 30.0 (Fraction: Both)

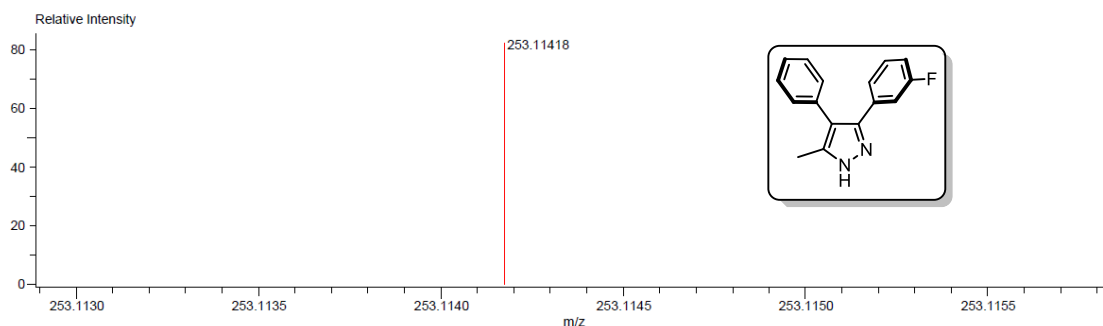

| Mass      | Intensity | Calc. Mass | Mass Difference (mmu) | Mass Difference (ppm) | Possible Formula                                                                                                     | Unsaturation Number |
|-----------|-----------|------------|-----------------------|-----------------------|----------------------------------------------------------------------------------------------------------------------|---------------------|
| 253.11418 | 62940.07  | 253.11410  | 0.07                  | 0.29                  | <sup>12</sup> C <sub>16</sub> <sup>1</sup> H <sub>14</sub> <sup>19</sup> F <sub>1</sub> <sup>14</sup> N <sub>2</sub> | 10.5                |

**Spectrum 82. HRMS of 8n.**

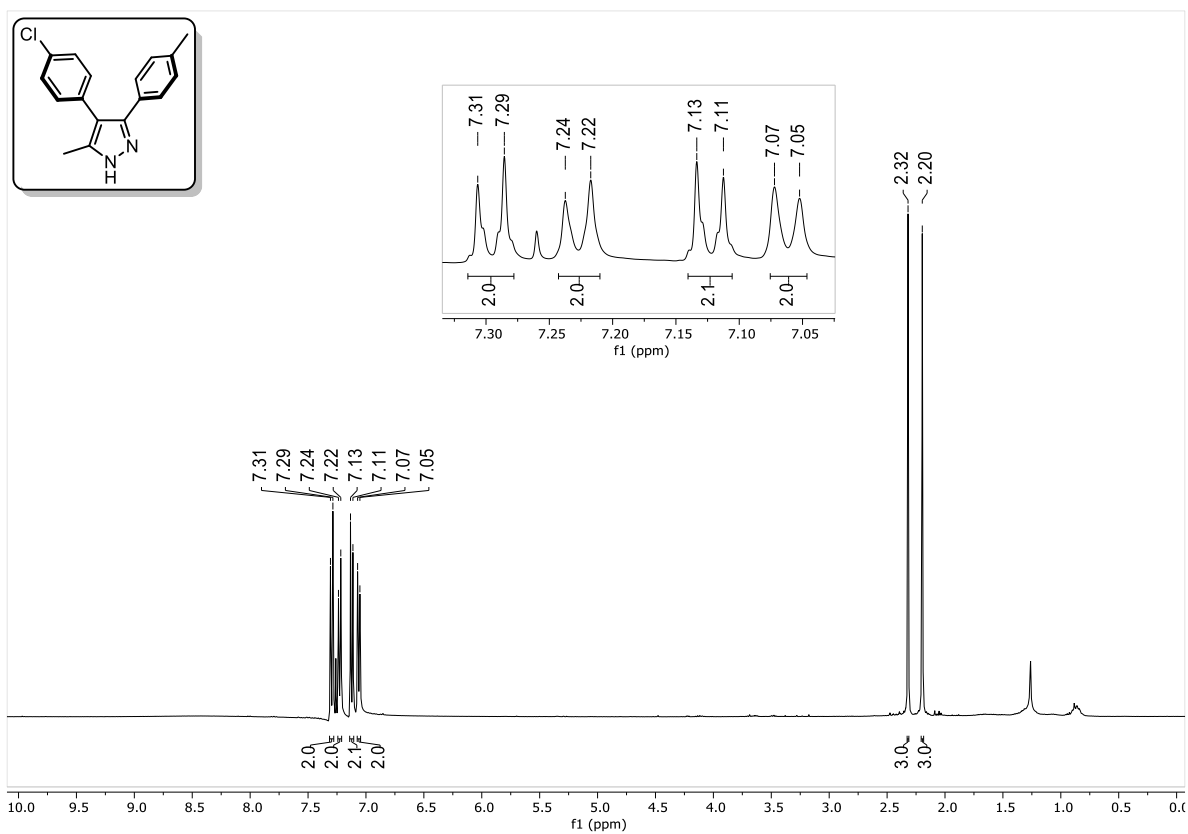

**Spectrum 83. <sup>1</sup>H-NMR of 8o.**

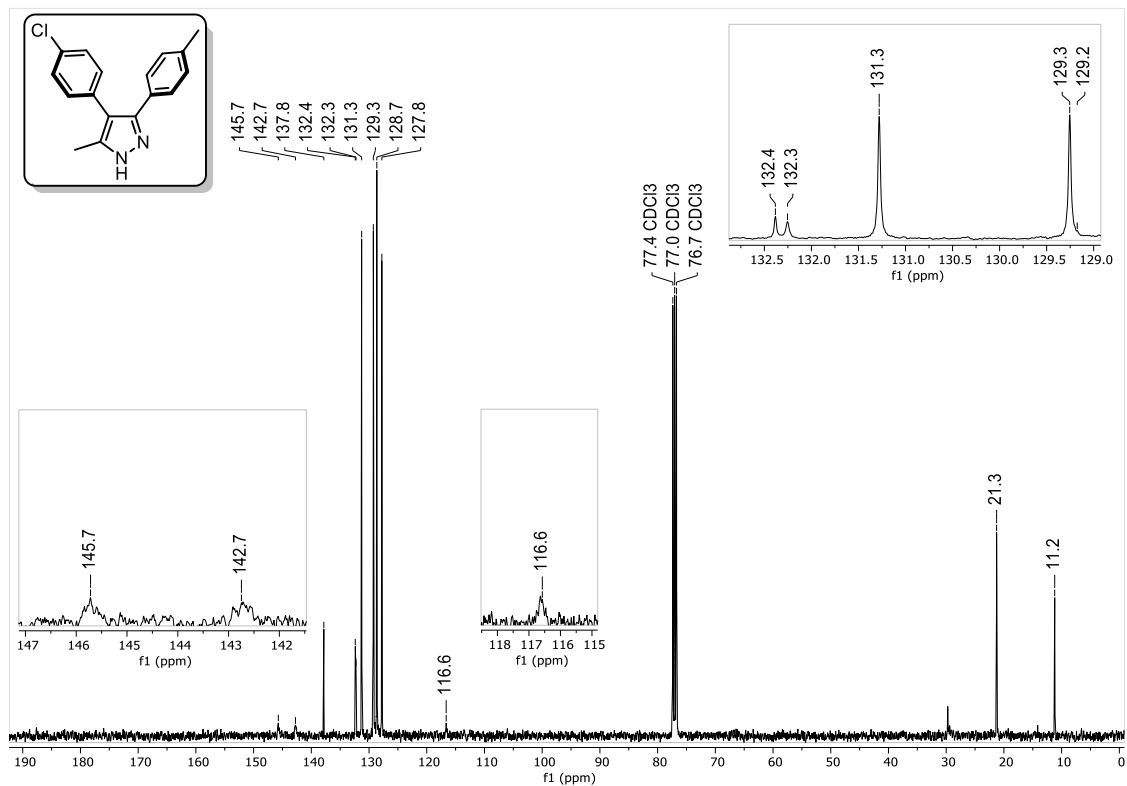

Spectrum 84  $^{13}\text{C}$ -NMR of 8o.

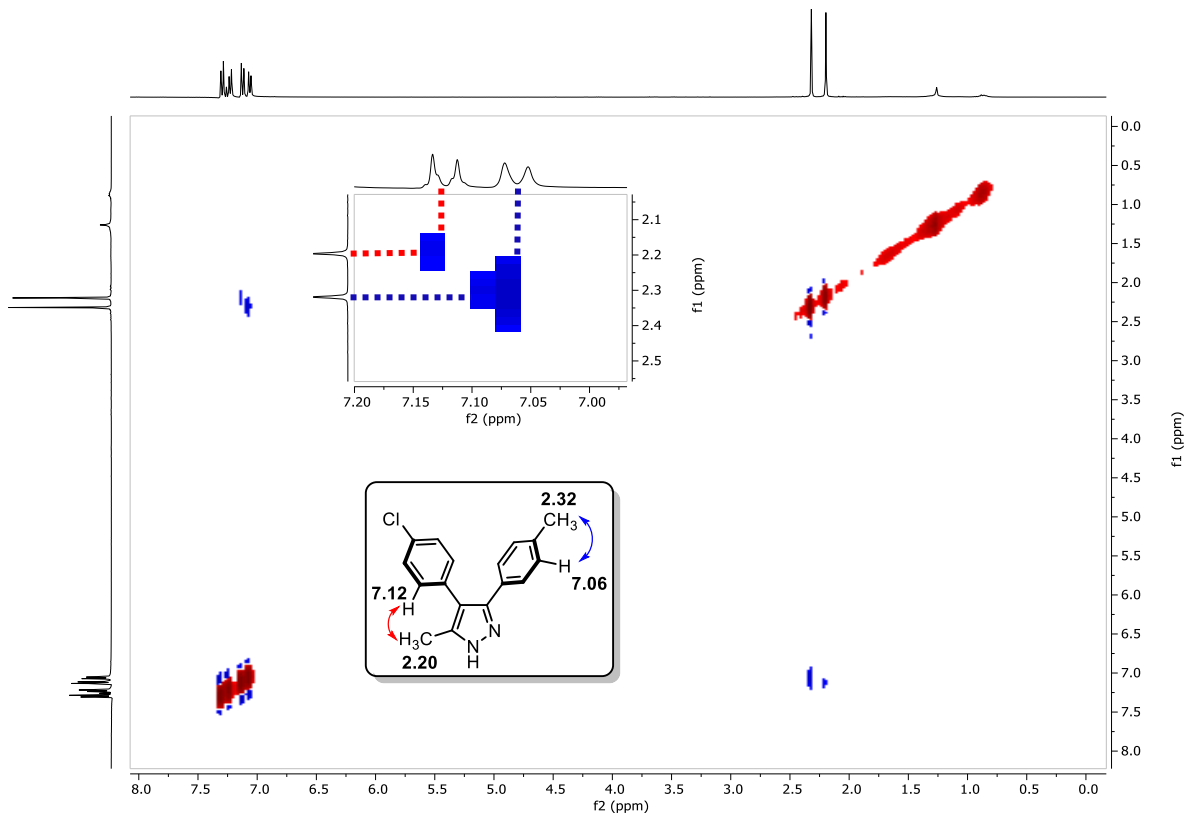

Spectrum 85. 2D-NOESY of 8o.

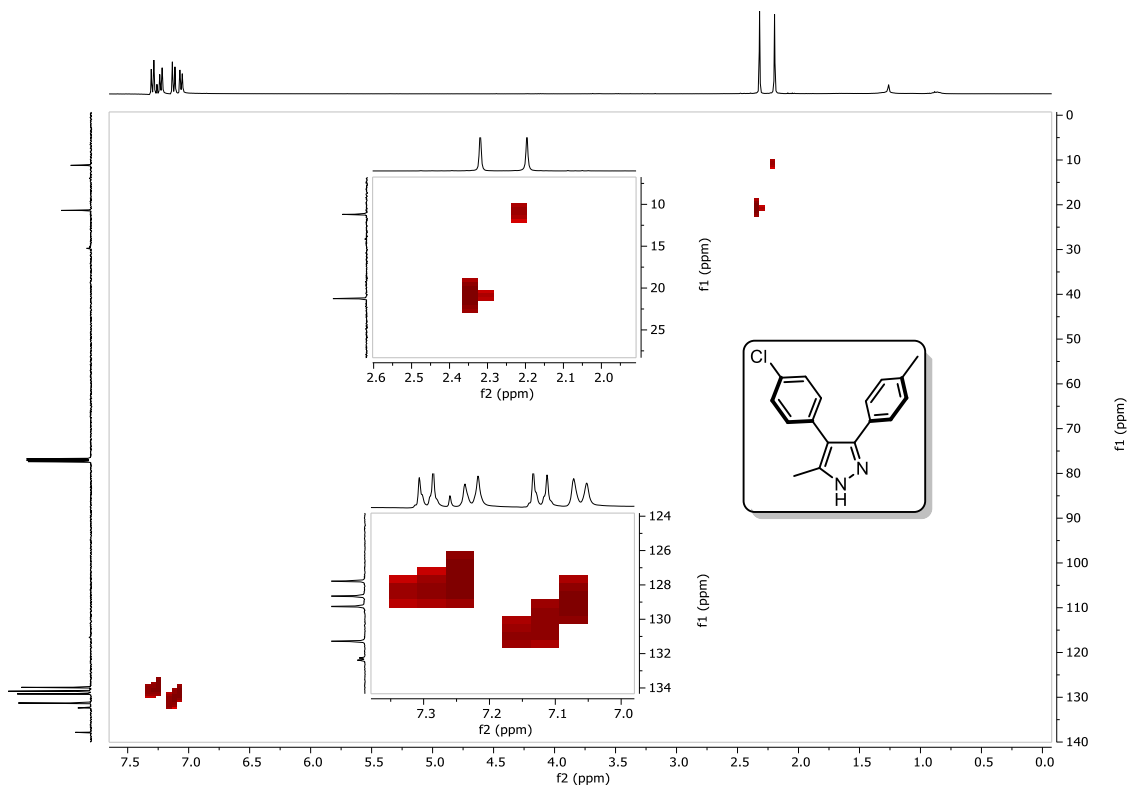

Spectrum 86. HSQC of 8o.

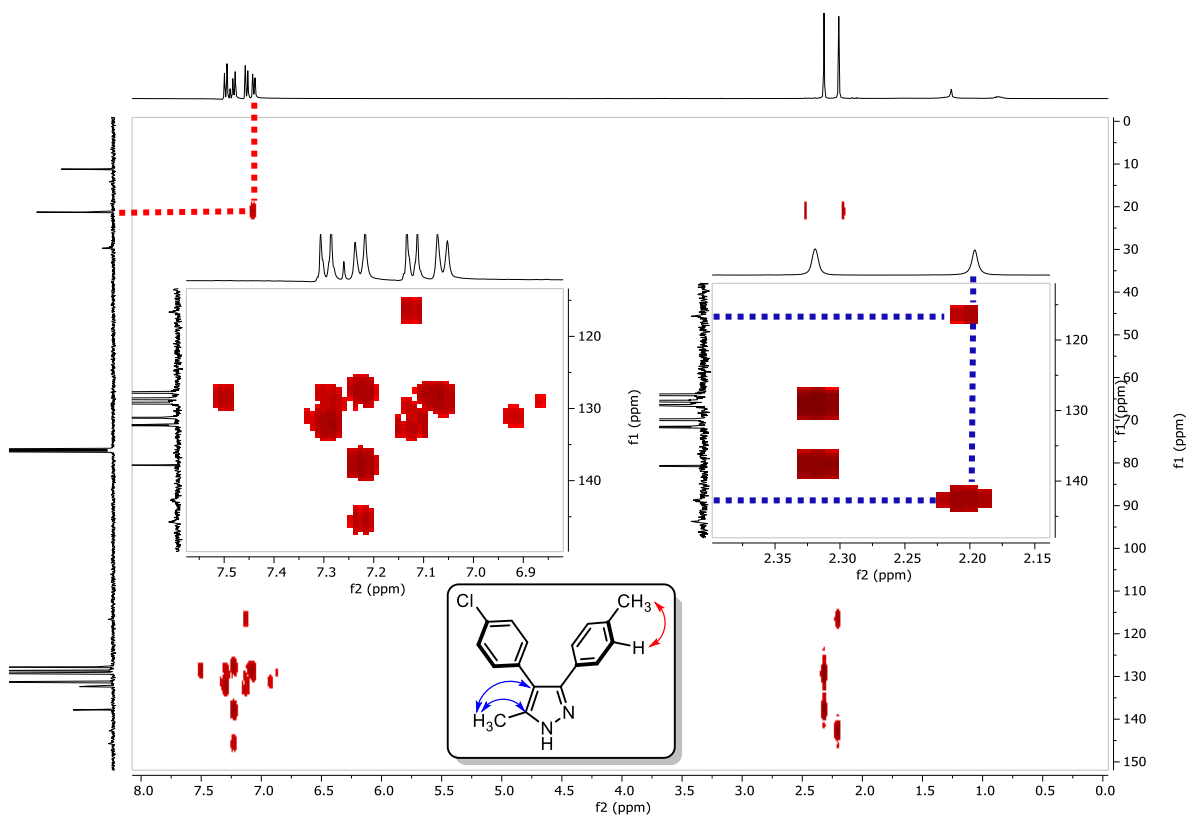

Spectrum 87. HMBC of 8o.

Description:  
 Ionization Mode:ESI+  
 History:Determine m/z[Peak Detect[Centroid,30,Area];Correct Base[];Smooth[5]];Correct Base[5.0%];Average[MS[...

Mass Calibration data:Cal\_PEG\_600  
 Created:1/25/2023 10:59:37 AM  
 Created by:AccuTOF

Charge number:1  
 Element:<sup>12</sup>C:0 .. 17, <sup>1</sup>H:0 .. 20, <sup>35</sup>Cl:0 .. 1, <sup>14</sup>N:0 .. 2, <sup>16</sup>O:0 .. 0  
 Tolerance:3.00(ppm), 5.00 .. 15.00(mmu)

Unsaturation Number:0.0 .. 45.0 (Fraction:Both)

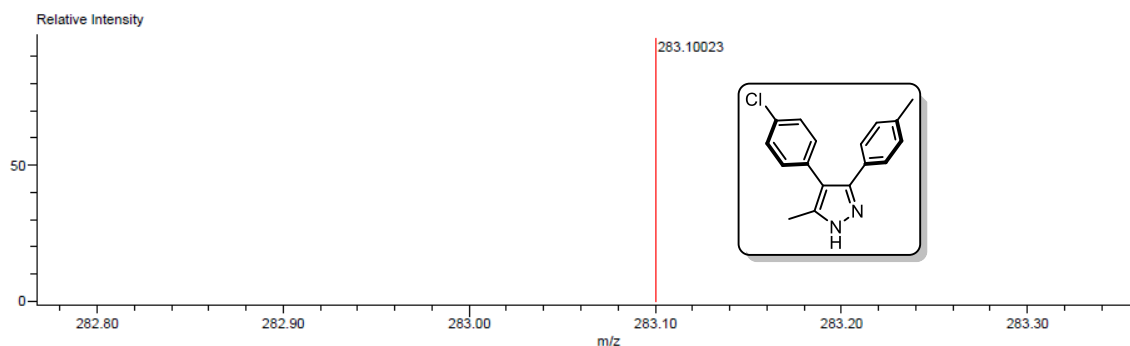

| Mass      | Intensity  | Calc. Mass | Mass Difference (mmu) | Mass Difference (ppm) | Possible Formula                                                                                                      | Unsaturation Number |
|-----------|------------|------------|-----------------------|-----------------------|-----------------------------------------------------------------------------------------------------------------------|---------------------|
| 283.10023 | 1926911.20 | 283.10020  | 0.03                  | 0.11                  | <sup>12</sup> C <sub>17</sub> <sup>1</sup> H <sub>16</sub> <sup>35</sup> Cl <sub>1</sub> <sup>14</sup> N <sub>2</sub> | 10.5                |

**Spectrum 88. HRMS of 8o.**

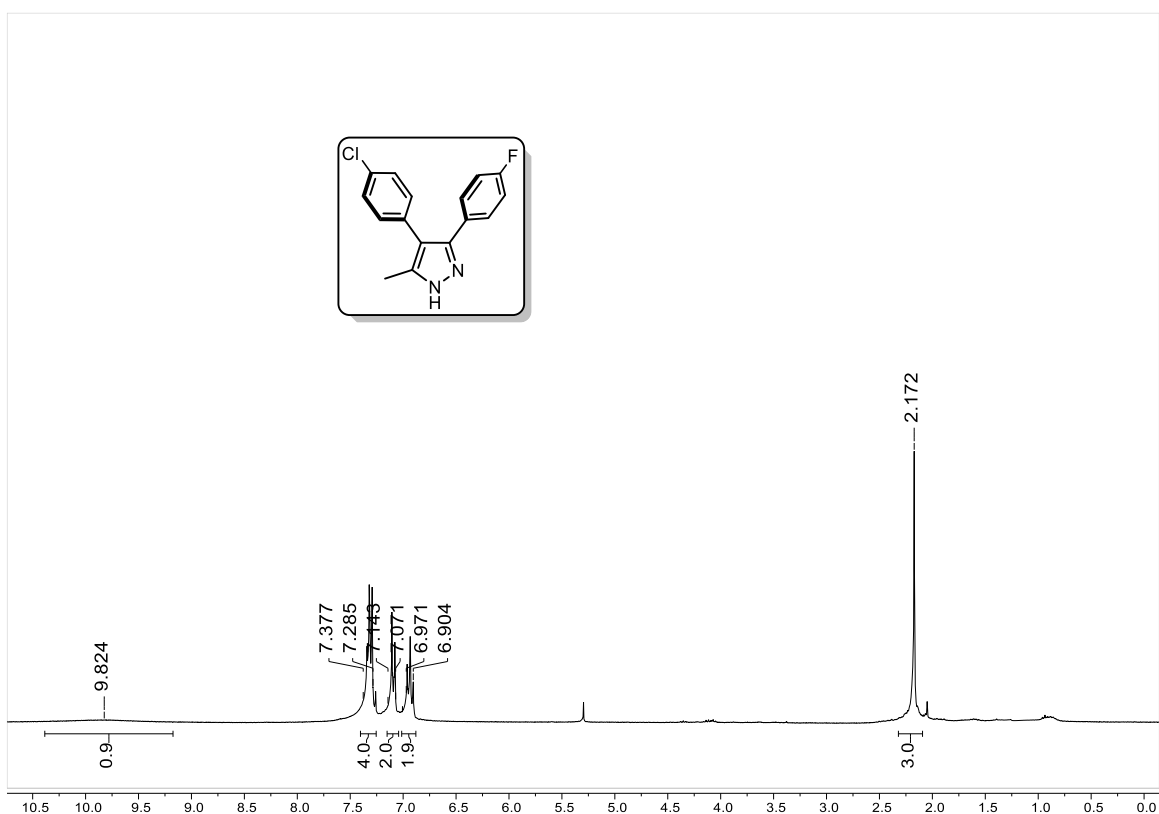

**Spectrum 89. <sup>1</sup>H-NMR of 8p.**



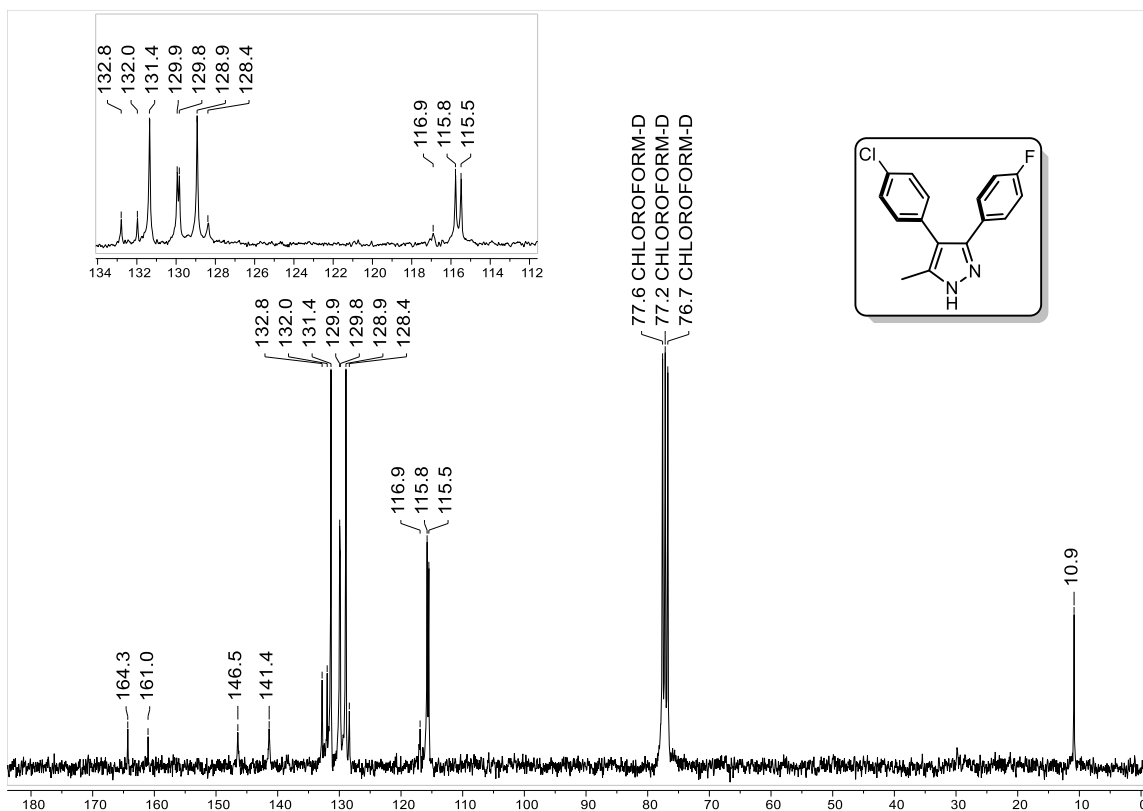

**Spectrum 90. <sup>13</sup>C-NMR of 8p.**

Description:  
 Ionization Mode:ESI+  
 History:Determine m/z[Peak Detect[Centroid,30,Area];Correct Base[];Smooth[5]];Correct Base[5.0%];Average(MS[...

Mass Calibration data:Cal\_PEG\_600  
 Created:2/15/2023 11:00:07 AM  
 Created by:

Charge number:1  
 Element:<sup>12</sup>C:0 .. 16, <sup>1</sup>H:0 .. 22, <sup>35</sup>Cl:0 .. 1, <sup>19</sup>F:0 .. 1, <sup>14</sup>N:0 .. 2, <sup>16</sup>O:0 .. 0  
 Tolerance:100.00(mmu)

Unsaturation Number:0.0 .. 20.0 (Fraction:Both)

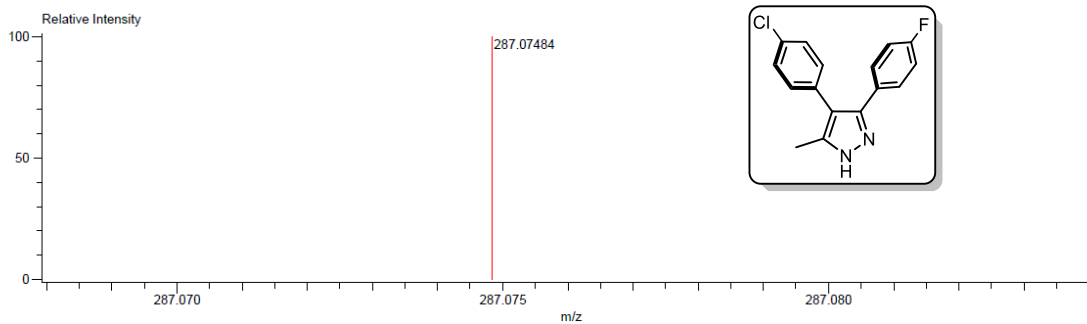

| Mass      | Intensity | Calc. Mass | Mass Difference (mmu) | Mass Difference (ppm) | Possible Formula                                                                                                                                   | Unsaturation Number |
|-----------|-----------|------------|-----------------------|-----------------------|----------------------------------------------------------------------------------------------------------------------------------------------------|---------------------|
| 287.07484 | 14179.37  | 287.07513  | -0.29                 | -1.00                 | <sup>12</sup> C <sub>18</sub> <sup>1</sup> H <sub>13</sub> <sup>35</sup> Cl <sub>1</sub> <sup>19</sup> F <sub>1</sub> <sup>14</sup> N <sub>2</sub> | 10.5                |

**Spectrum 91. HRMS of 8p.**

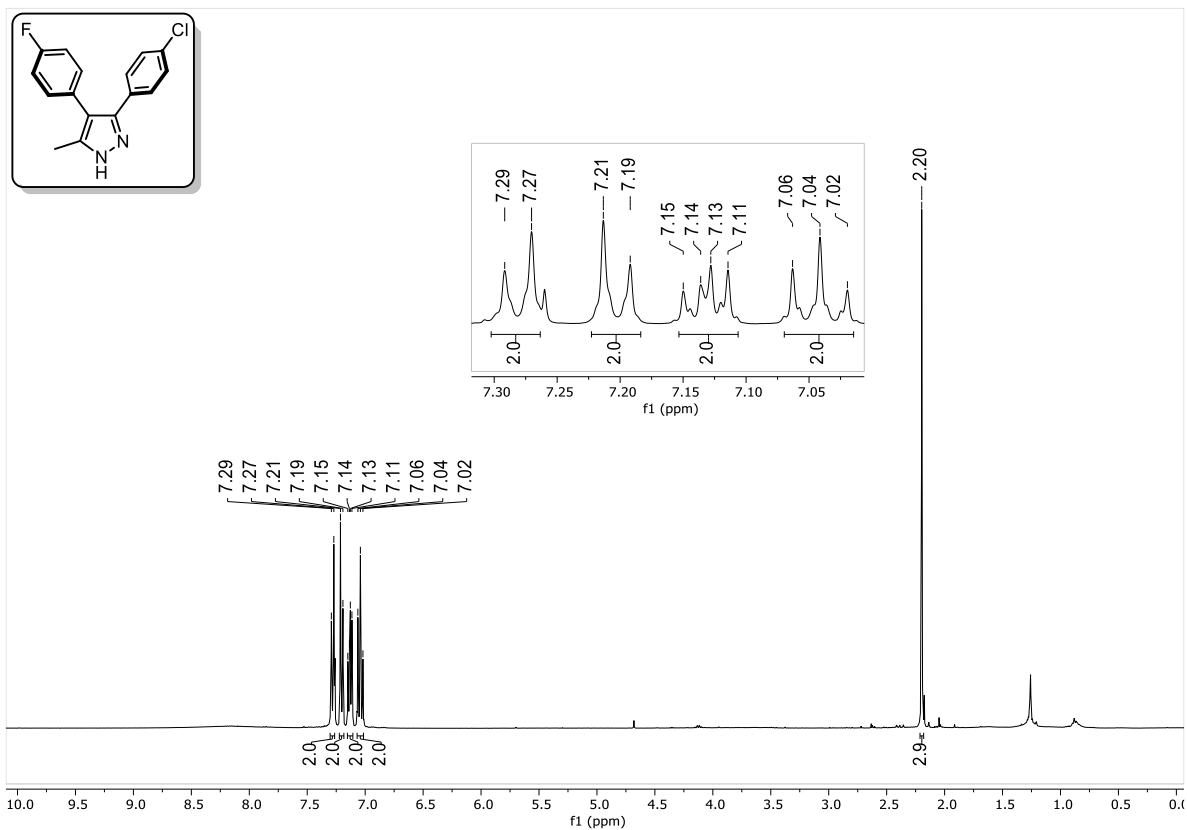

**Spectrum 92. <sup>1</sup>H-NMR of 8q.**

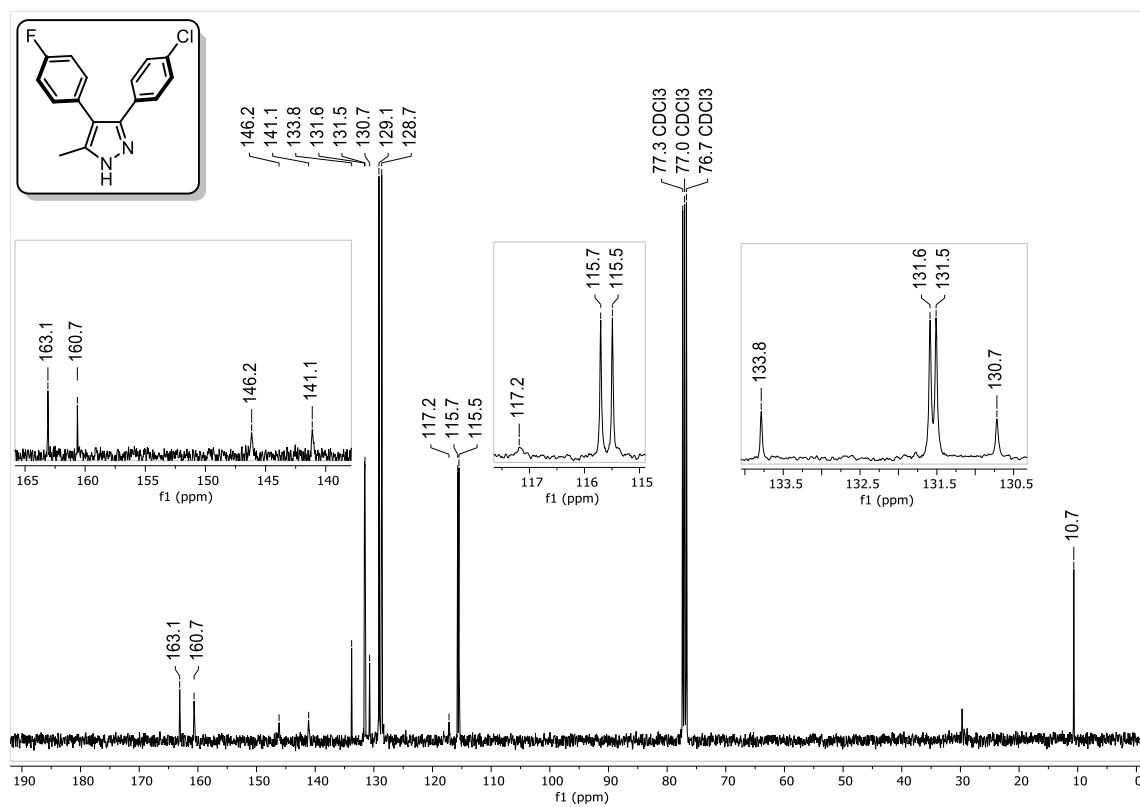

**Spectrum 93. <sup>13</sup>C-NMR of 8q.**

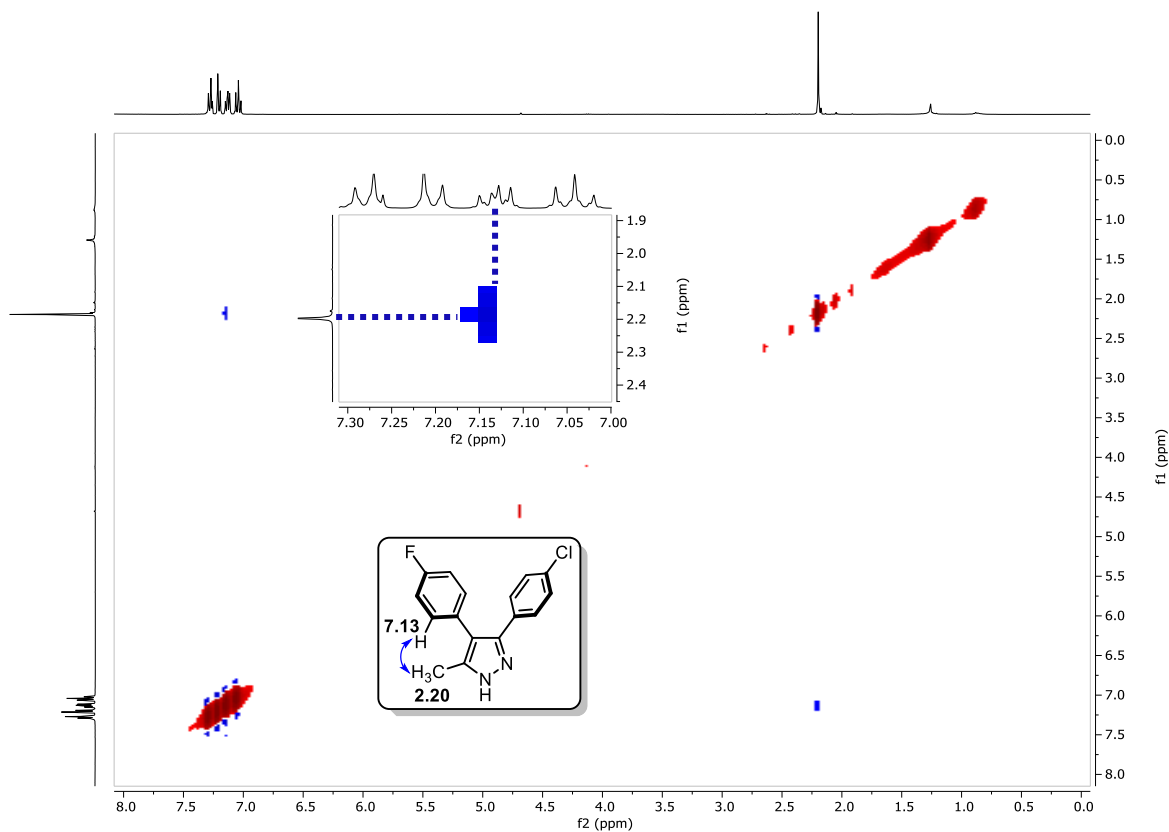

Spectrum 94. 2D-NOESY of 8q.

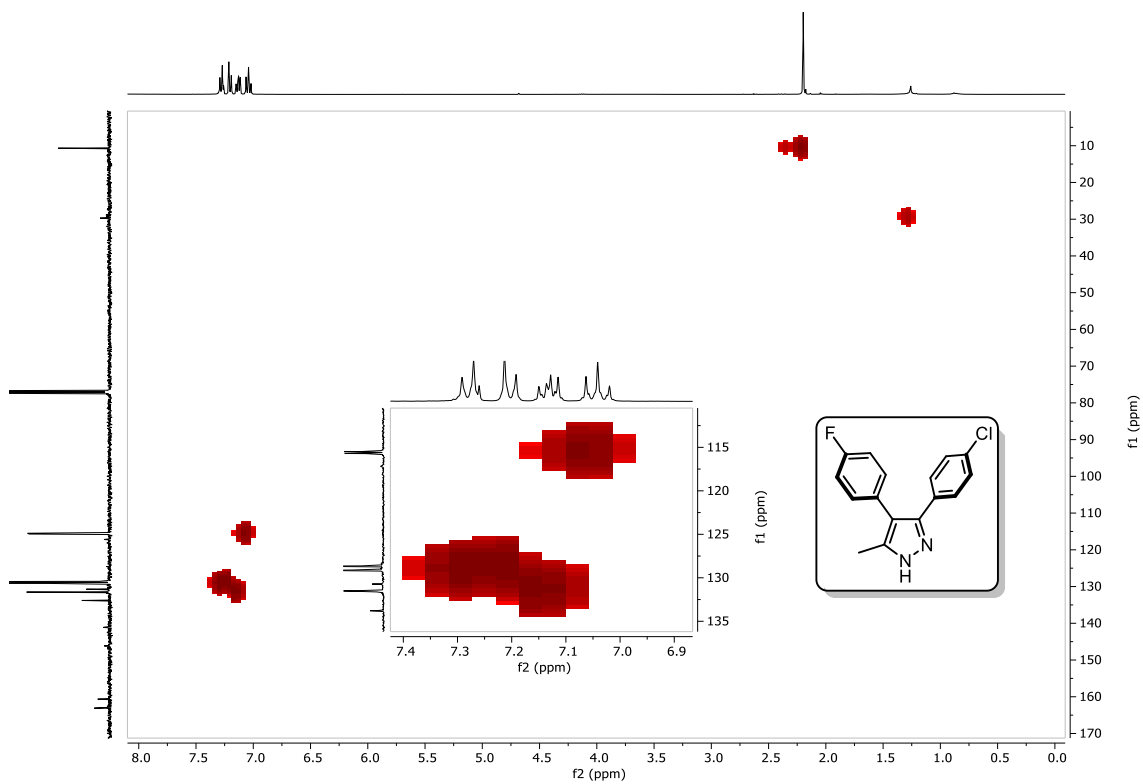

Spectrum 95. HSQC of 8q.

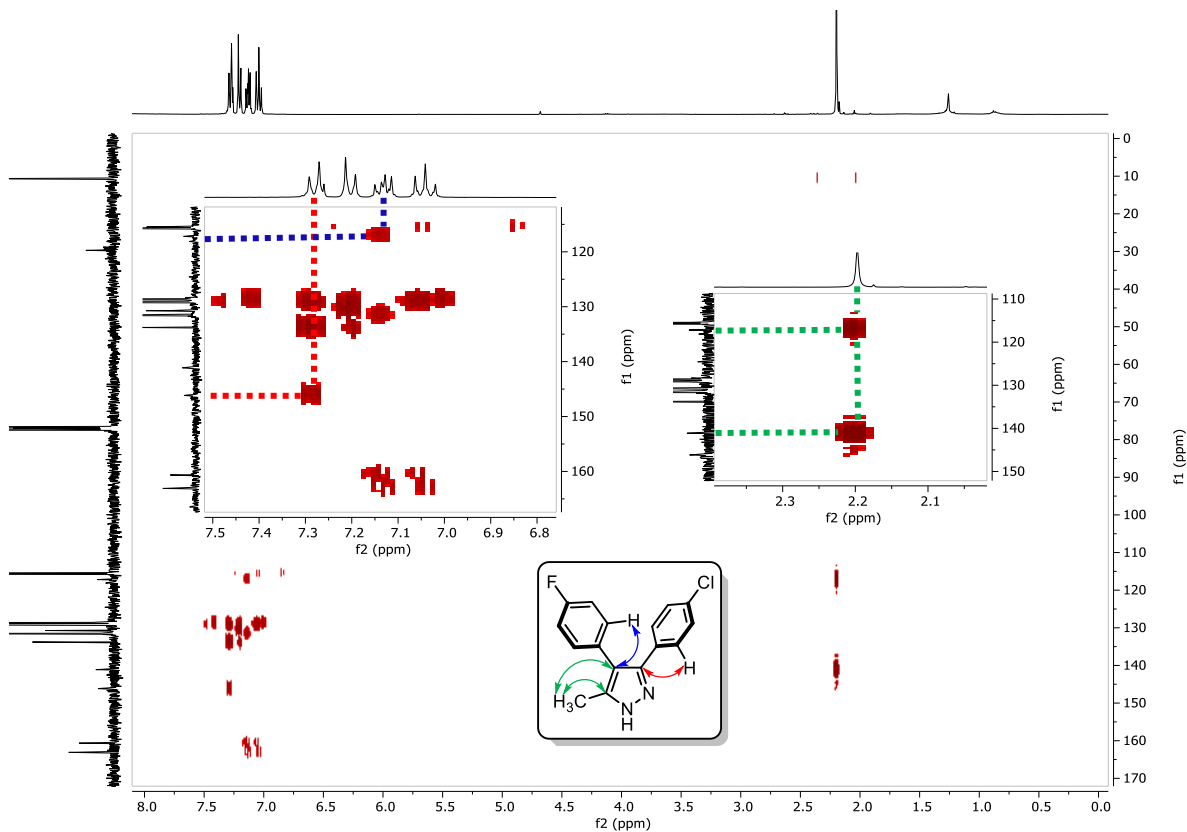

**Spectrum 96. HMBC of 8q.**

Description: Ionization Mode: ESI+  
 History: Determine m/z [Peak Detect [Centroid, 30, Area]; Correct Base[]; Smooth [5]]; Correct Base [5.0%]; Average (MS[...])

Mass Calibration data: Cal\_PEG\_600  
 Created: 1/25/2023 11:02:36 AM  
 Created by: AccuTOF

Charge number: 1 Tolerance: 3.00 (ppm), 5.00 .. 15.00 (mmu) Unsaturation Number: 0.0 .. 45.0 (Fraction: Both)  
 Element: <sup>12</sup>C: 0 .. 16, <sup>1</sup>H: 0 .. 20, <sup>35</sup>Cl: 0 .. 1, <sup>19</sup>F: 1 .. 1, <sup>14</sup>N: 0 .. 2, <sup>16</sup>O: 0 .. 0

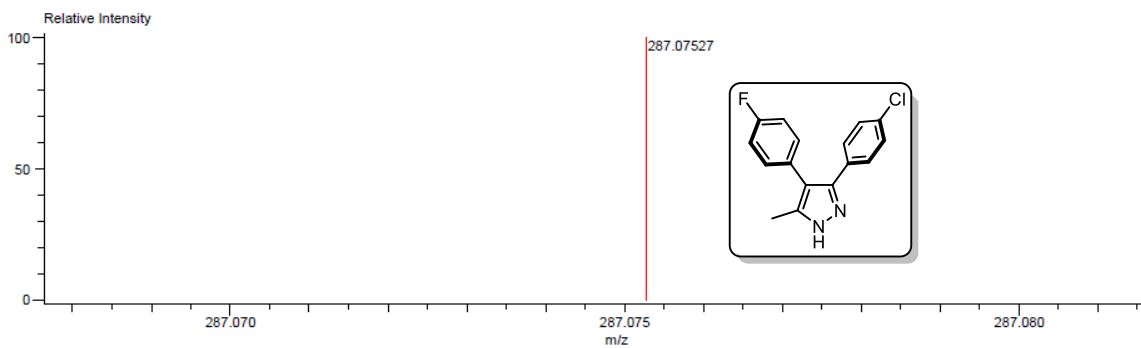

| Mass      | Intensity | Calc. Mass | Mass Difference (mmu) | Mass Difference (ppm) | Possible Formula                                                                                                                                   | Unsaturation Number |
|-----------|-----------|------------|-----------------------|-----------------------|----------------------------------------------------------------------------------------------------------------------------------------------------|---------------------|
| 287.07527 | 17703.09  | 287.07513  | 0.14                  | 0.49                  | <sup>12</sup> C <sub>16</sub> <sup>1</sup> H <sub>13</sub> <sup>35</sup> Cl <sub>1</sub> <sup>19</sup> F <sub>1</sub> <sup>14</sup> N <sub>2</sub> | 10.5                |

**Spectrum 97. HRMS of 8q.**

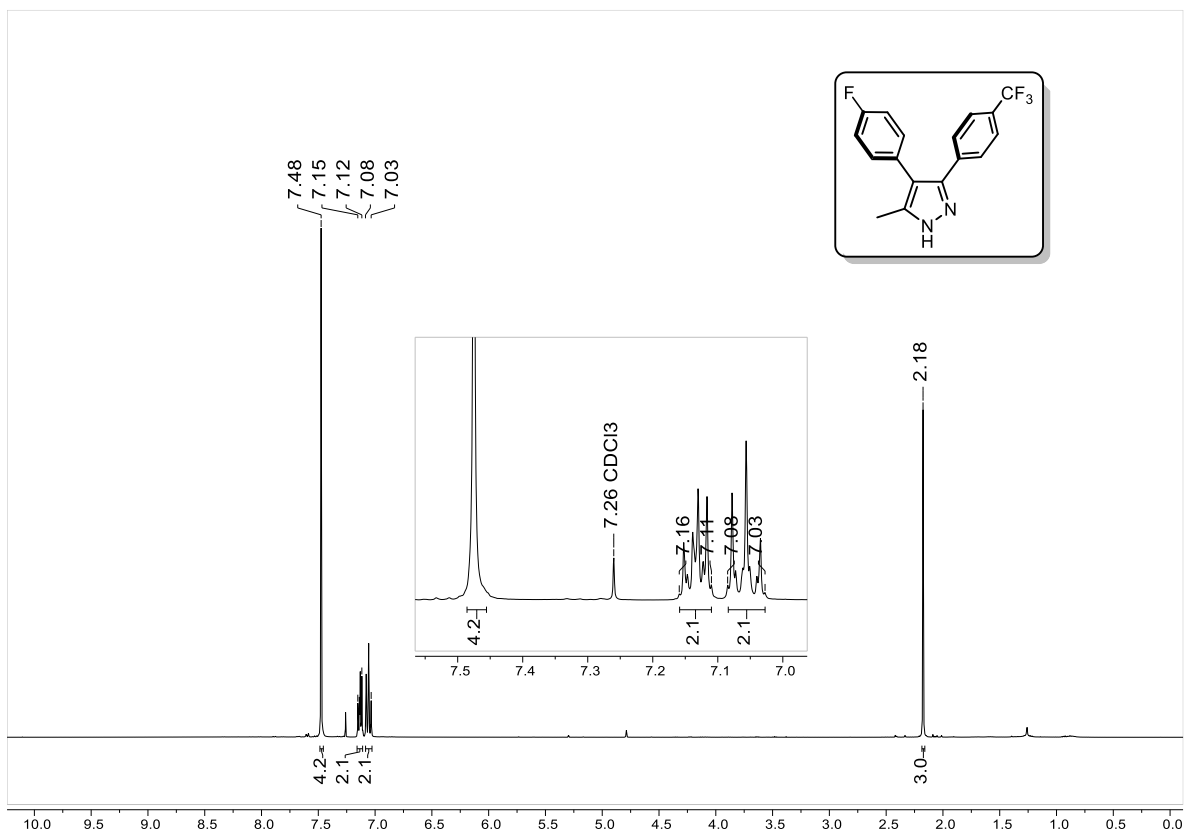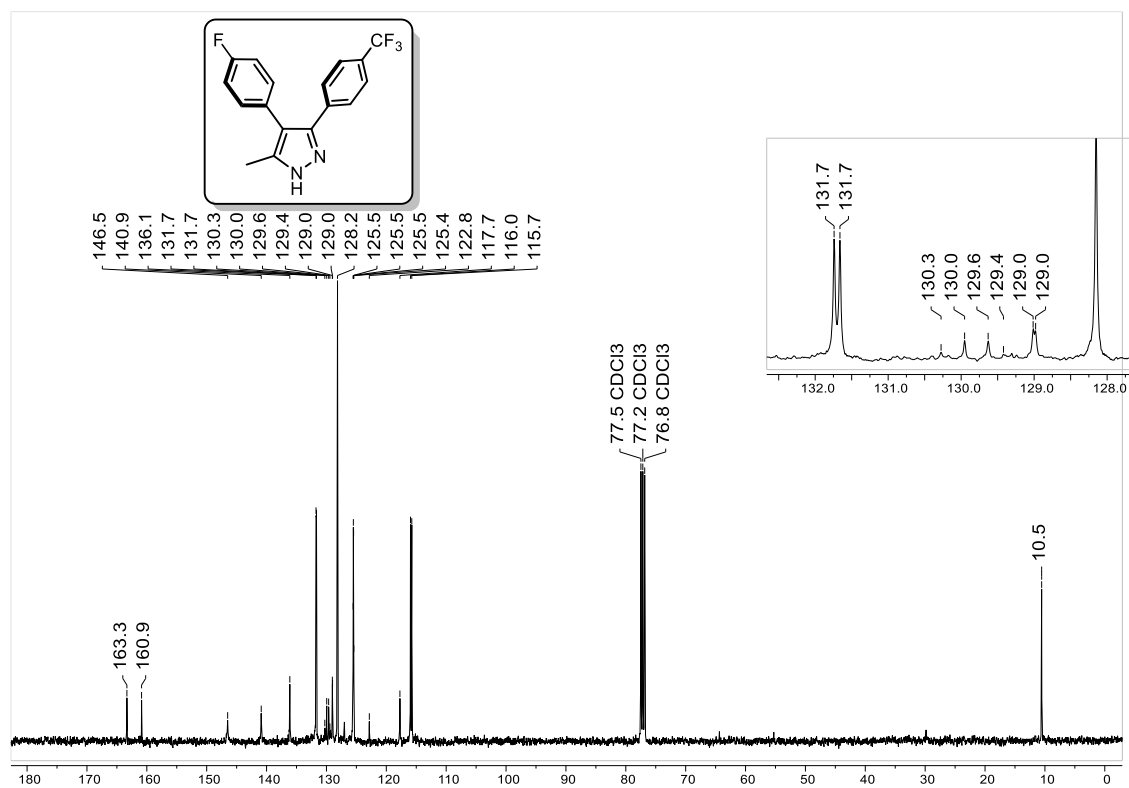

Description:  
 Ionization Mode:ESI+  
 History:Determine m/z[Peak Detect[Centroid,30,Area];Correct Base[];Smooth[5]];Correct Base[5.0%];Average[MS[...

Mass Calibration data:Cal\_PEG\_600  
 Created:2/2/2023 10:33:12 AM  
 Created by:AccuTOF

Charge number:1  
 Element:<sup>12</sup>C:0 .. 17, <sup>1</sup>H:0 .. 50, <sup>19</sup>F:0 .. 4, <sup>14</sup>N:0 .. 2, <sup>16</sup>O:0 .. 0  
 Tolerance:50.00(ppm), 5.00 .. 15.00(mmu)

Unsaturation Number:0.0 .. 50.0 (Fraction:.5)

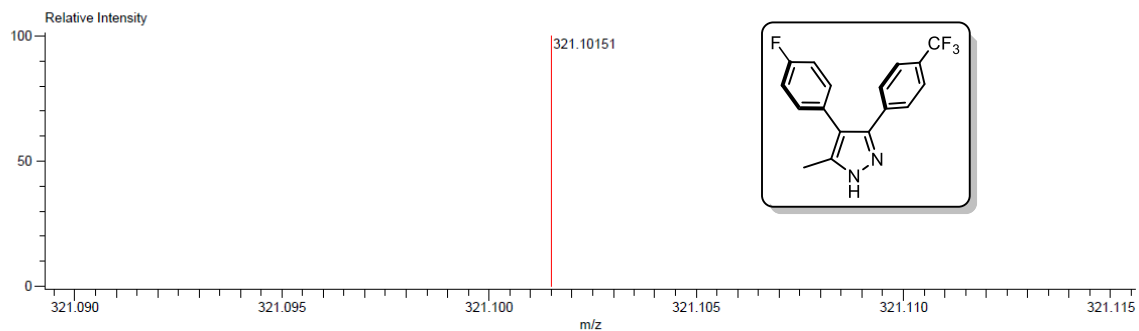

| Mass      | Intensity | Calc. Mass | Mass Difference (mmu) | Mass Difference (ppm) | Possible Formula                                                                                                     | Unsaturation Number |
|-----------|-----------|------------|-----------------------|-----------------------|----------------------------------------------------------------------------------------------------------------------|---------------------|
| 321.10151 | 4047.61   | 321.10149  | 0.02                  | 0.07                  | <sup>12</sup> C <sub>17</sub> <sup>1</sup> H <sub>13</sub> <sup>19</sup> F <sub>4</sub> <sup>14</sup> N <sub>2</sub> | 10.5                |

**Spectrum 100. HRMS of 8r.**

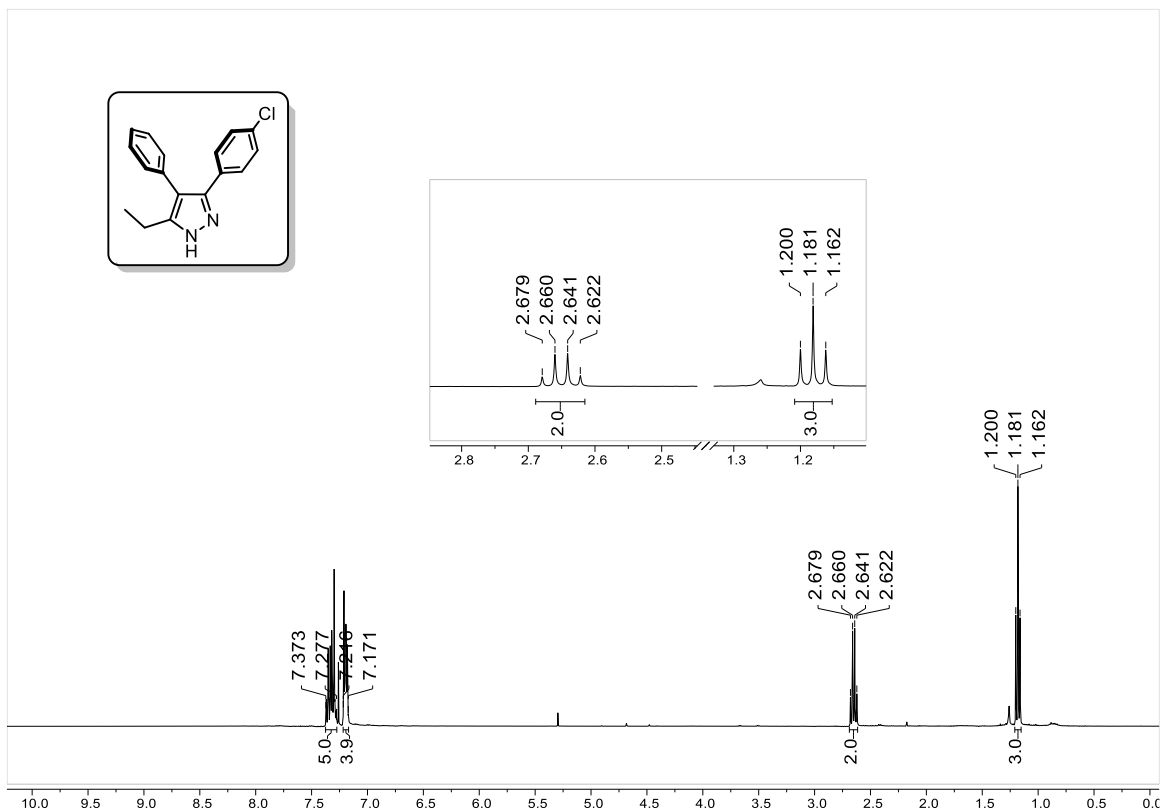

**Spectrum 101. <sup>1</sup>H-NMR of 8s.**

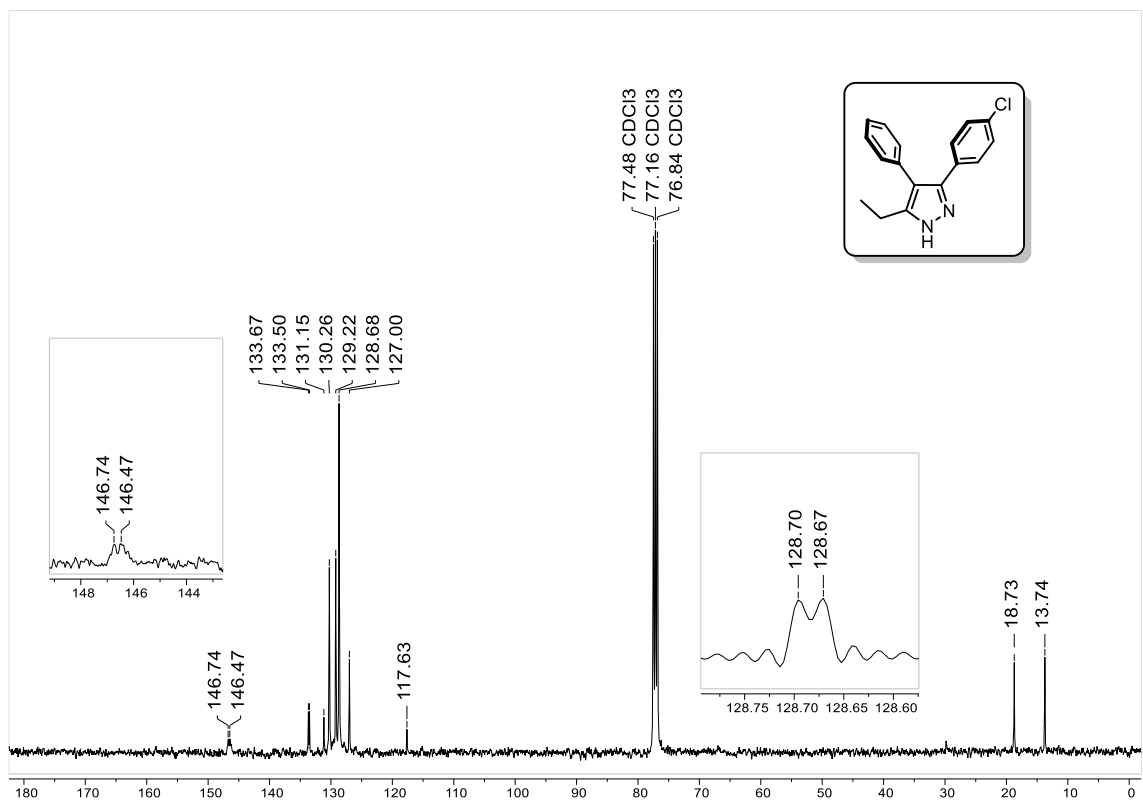

Spectrum 102. <sup>13</sup>C-NMR of 8s.

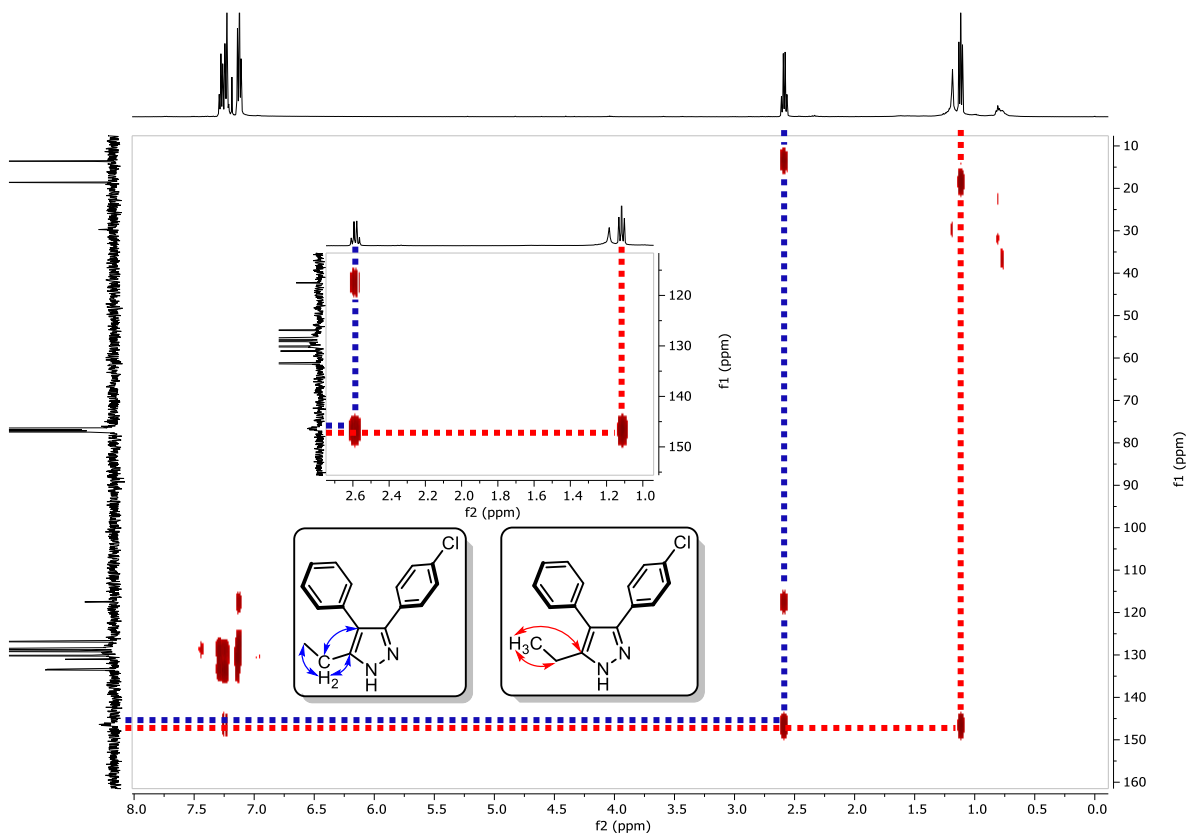

Spectrum 103. HMBC of 8s.

Ionization Mode: ESI+

History: Determine m/z [Peak Detect [Centroid, 30, Area], Correct Base [], Smooth [5]], Correct Base [5.0%], Average [MS]...

Created: 3/10/2023 9:26:52 AM

Created by: AccuTOF

Charge number: 1

Tolerance: 50.00 (ppm), 5.00 .. 15.00 (mmu)

Unsaturation Number: 0.0 .. 50.0 (Fraction: Both)

Element: <sup>12</sup>C: 0 .. 17, <sup>1</sup>H: 0 .. 50, <sup>35</sup>Cl: 0 .. 1, <sup>19</sup>F: 0 .. 0, <sup>14</sup>N: 0 .. 2, <sup>16</sup>O: 0 .. 0, <sup>32</sup>S: 0 .. 0

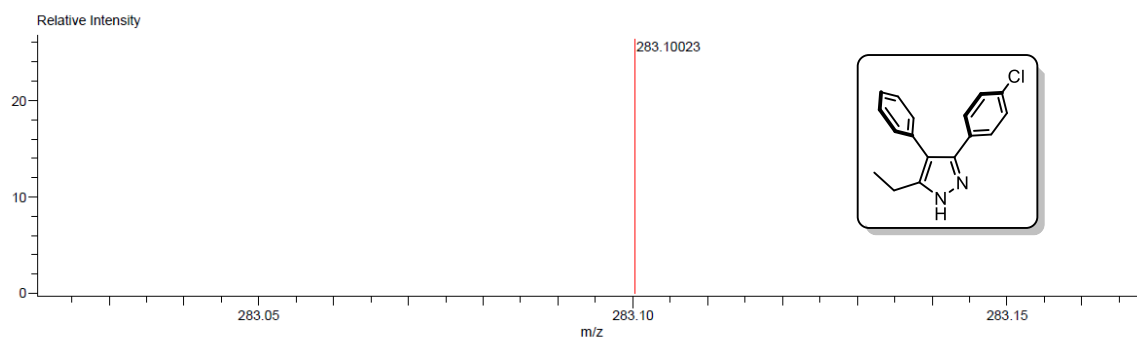

| Mass      | Intensity | Calc. Mass | Mass Difference (mmu) | Mass Difference (ppm) | Possible Formula                                                                                                      | Unsaturation Number |
|-----------|-----------|------------|-----------------------|-----------------------|-----------------------------------------------------------------------------------------------------------------------|---------------------|
| 283.10023 | 377996.21 | 283.10020  | 0.03                  | 0.12                  | <sup>12</sup> C <sub>17</sub> <sup>1</sup> H <sub>18</sub> <sup>35</sup> Cl <sub>1</sub> <sup>14</sup> N <sub>2</sub> | 10.5                |

Spectrum 104. HRMS of 8s.

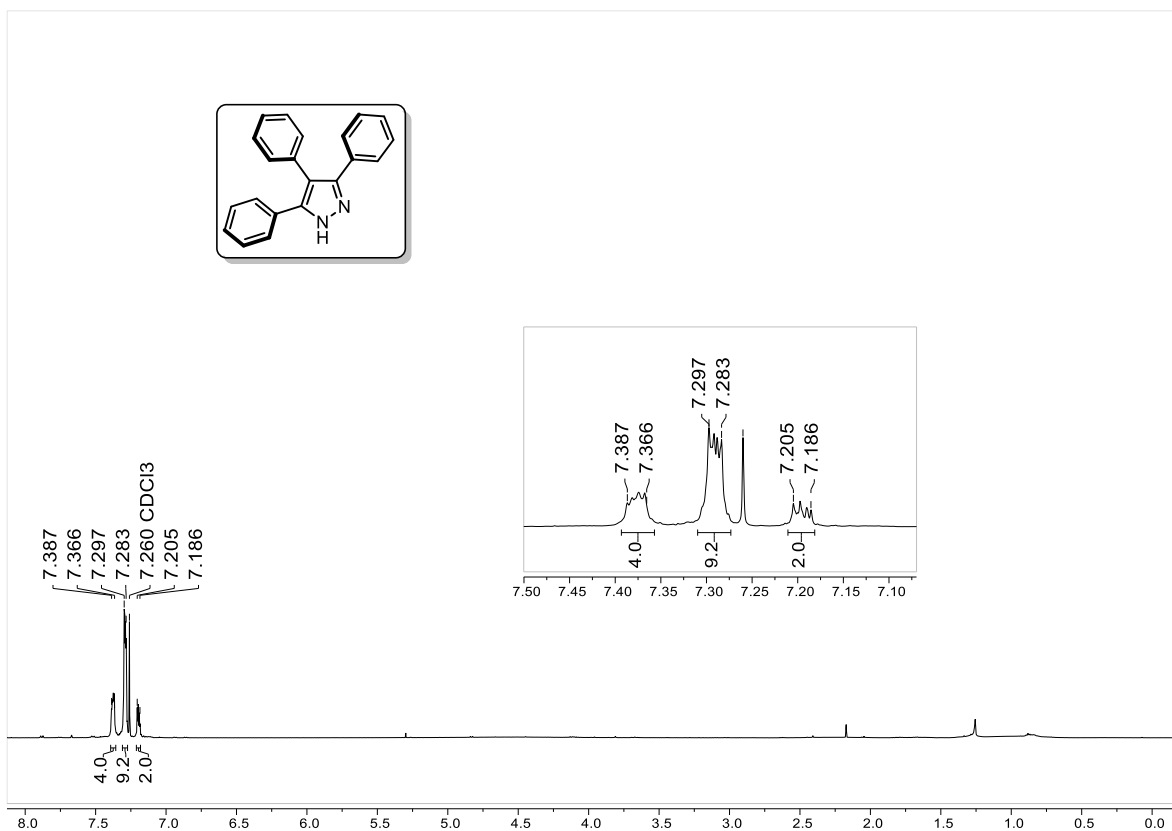

Spectrum 105. <sup>1</sup>H-NMR of 8t.



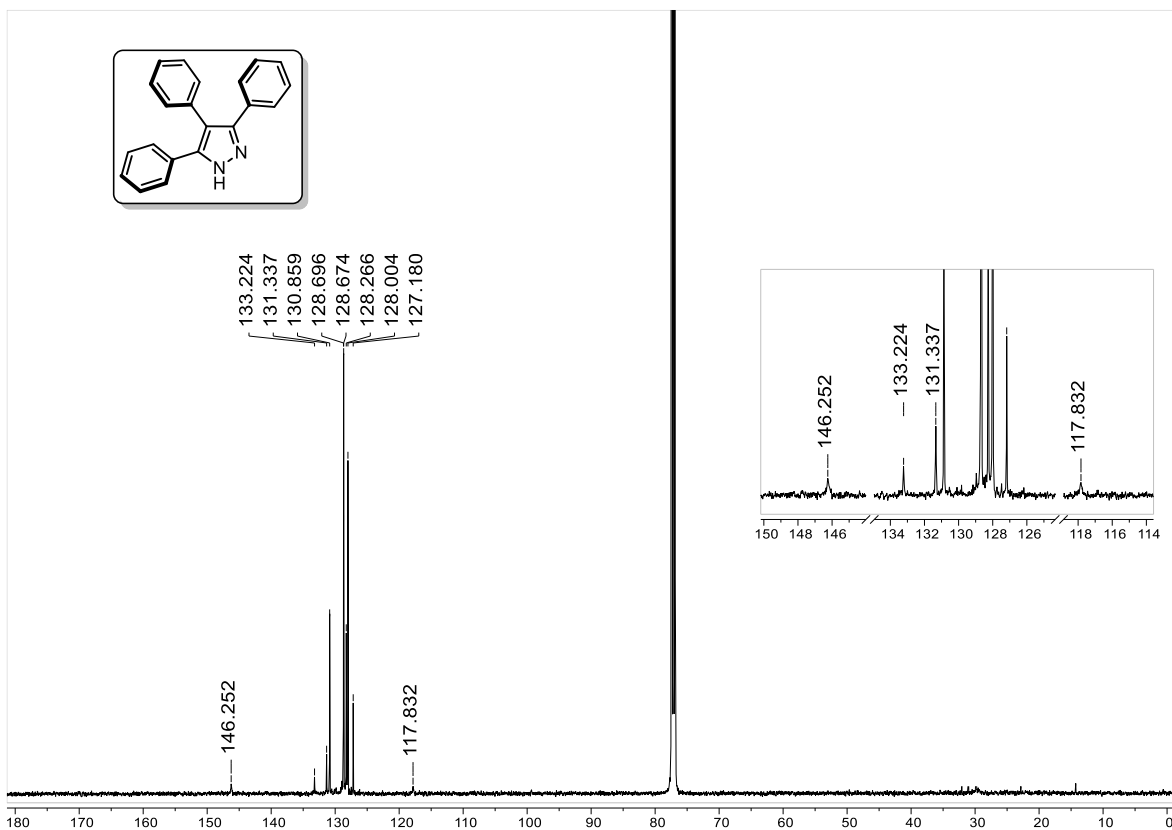

**Spectrum 106.**  $^{13}\text{C}$ -NMR of 8t.

Description: Mass Calibration data: Cal\_PEG\_600  
 Ionization Mode: ESI+ Created: 3/17/2023 11:01:00 AM  
 History: Determine m/z [Peak Detect [Centroid, 30, Area]; Correct Base[]; Smooth [5]]; Correct Base [5.0%]; Average [MS...]  
 Created by: AccuTOF

Charge number: 1 Tolerance: 5.00 (mmu) Unsaturation Number: 0.0 .. 50.0 (Fraction: Both)  
 Element:  $^{12}\text{C}$ : 0 .. 21,  $^1\text{H}$ : 0 .. 18,  $^{14}\text{N}$ : 0 .. 2,  $^{32}\text{S}$ : 0 .. 0

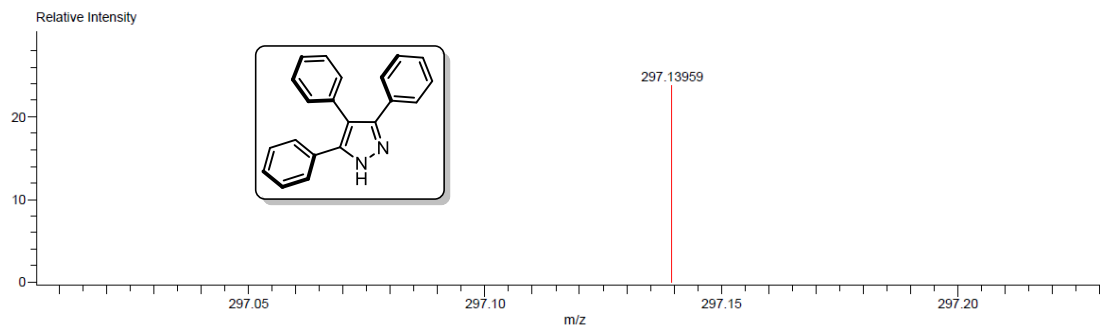

| Mass      | Intensity | Calc. Mass | Mass Difference (mmu) | Mass Difference (ppm) | Possible Formula                            | Unsaturation Number |
|-----------|-----------|------------|-----------------------|-----------------------|---------------------------------------------|---------------------|
| 297.13959 | 22230.20  | 297.13917  | 0.42                  | 1.42                  | $^{12}\text{C}_{21}\text{H}_{17}\text{N}_2$ | 14.5                |

**Spectrum 107.** HRMS of 8t.

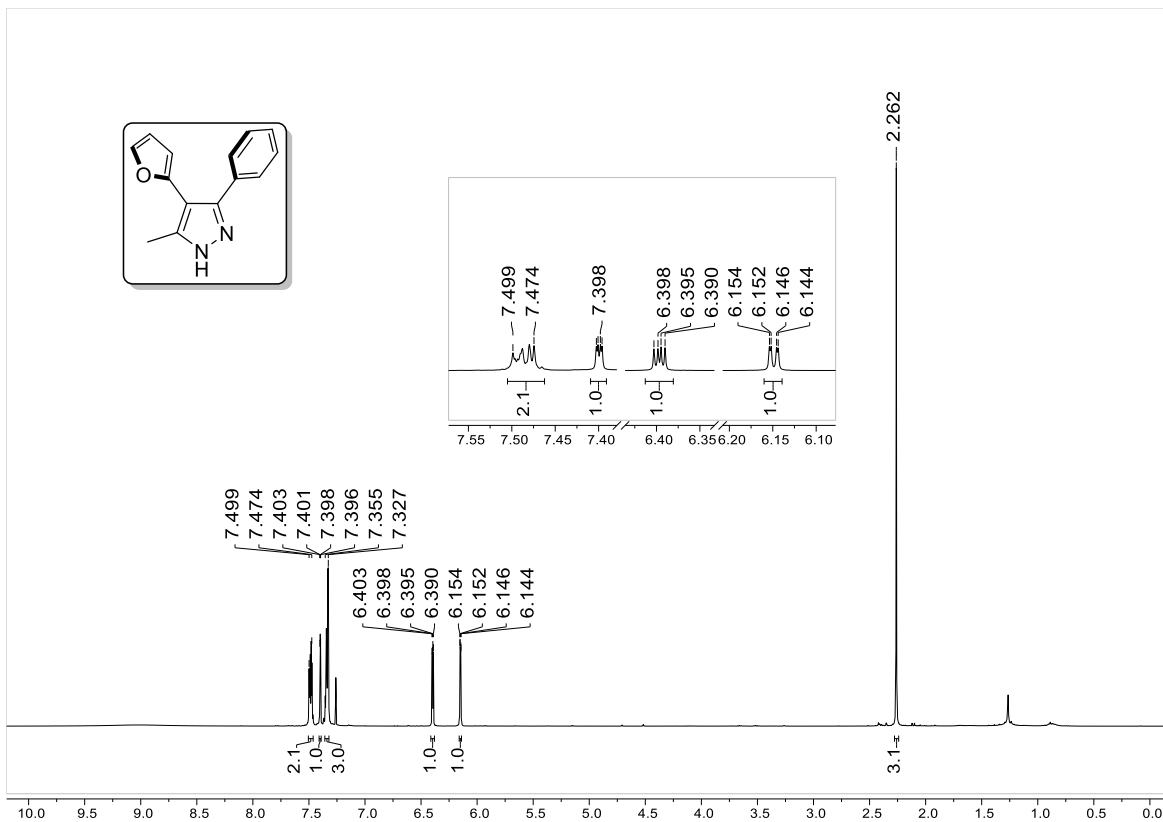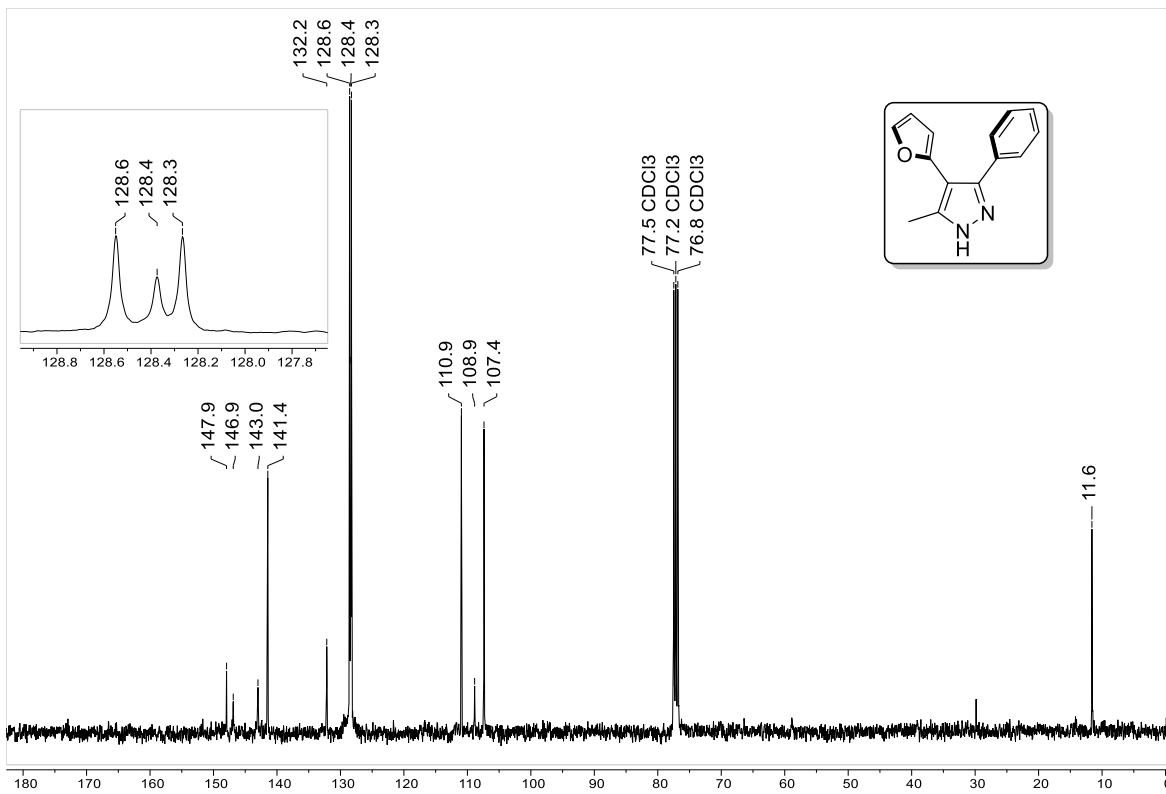

Description:  
 Ionization Mode:ESI+  
 History:Determine m/z[Peak Detect[Centroid,30,Area];Correct Base[;Smooth[5];Correct Base[5.0%];Average[MS[...

Mass Calibration data:Cal\_PEG\_600  
 Created:2/23/2023 12:57:25 PM  
 Created by:AccuTOF

Charge number:1  
 Element:<sup>12</sup>C:0 .. 17, <sup>1</sup>H:0 .. 18, <sup>14</sup>N:0 .. 2, <sup>16</sup>O:0 .. 1

Tolerance:4.00(ppm), 5.00 .. 15.00(mmu)

Unsaturation Number:0.0 .. 40.0 (Fraction:Both)

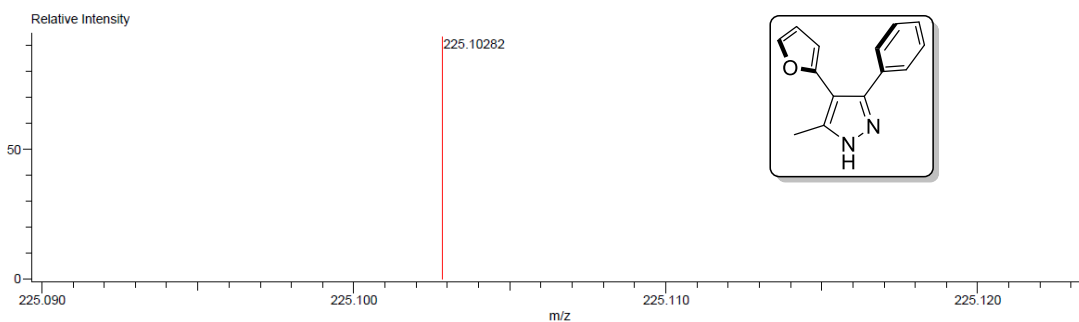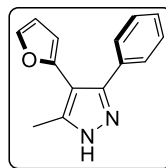

| Mass      | Intensity | Calc. Mass | Mass Difference (mmu) | Mass Difference (ppm) | Possible Formula                                                                                                     | Unsaturation Number |
|-----------|-----------|------------|-----------------------|-----------------------|----------------------------------------------------------------------------------------------------------------------|---------------------|
| 225.10282 | 5968.48   | 225.10279  | 0.03                  | 0.14                  | <sup>12</sup> C <sub>14</sub> <sup>1</sup> H <sub>13</sub> <sup>14</sup> N <sub>2</sub> <sup>16</sup> O <sub>1</sub> | 9.5                 |

**Spectrum 110. HRMS of 8u.**

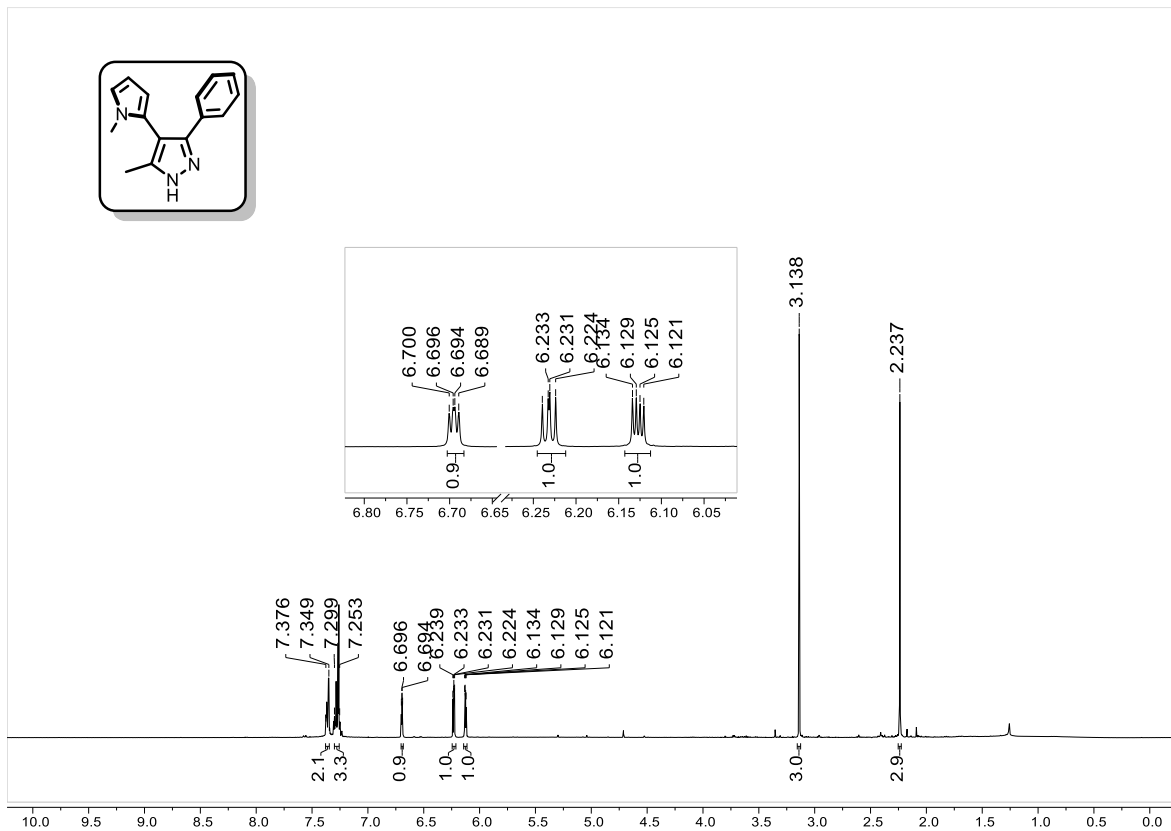

**Spectrum 111. <sup>1</sup>H-NMR of 8v.**

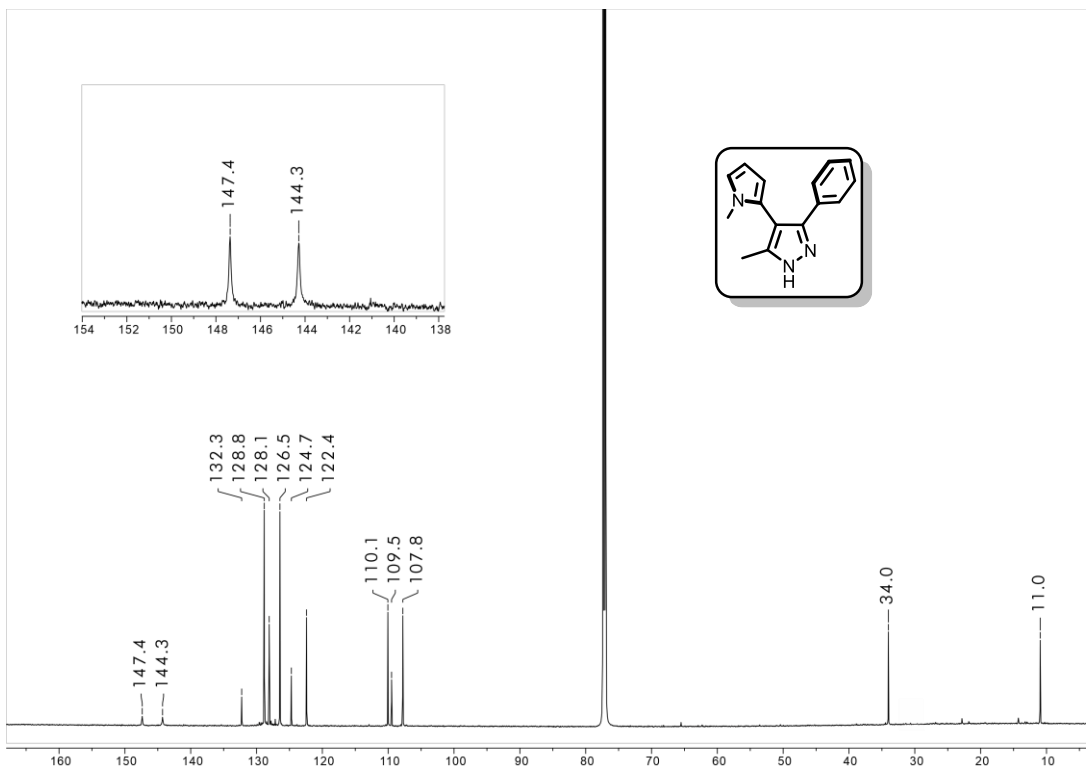

**Spectrum 112.**  $^{13}\text{C}$ -NMR of **8v**.

Description:

Ionization Mode:ESI+

History:Determine m/z[Peak Detect[Centroid,30,Area];Correct Base];Smooth[5];Correct Base[5.0%];Average[MS[...

Mass Calibration data:Cal\_PEG\_600

Created:3/13/2023 2:53:20 PM

Created by:AccuTOF

Charge number:1

Tolerance:100.00(mmu)

Unsaturation Number:0.0 .. 40.0 (Fraction:Both)

Element: $^{12}\text{C}$ :0 .. 15,  $^1\text{H}$ :0 .. 16,  $^{14}\text{N}$ :3 .. 3,  $^{16}\text{O}$ :0 .. 0,  $^{32}\text{S}$ :0 .. 0

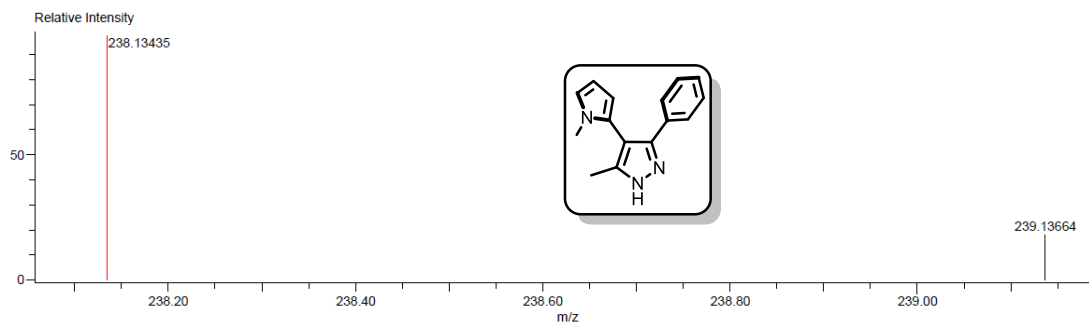

| Mass      | Intensity | Calc. Mass | Mass Difference (mmu) | Mass Difference (ppm) | Possible Formula                            | Unsaturation Number |
|-----------|-----------|------------|-----------------------|-----------------------|---------------------------------------------|---------------------|
| 238.13435 | 21076.71  | 238.13442  | -0.07                 | -0.29                 | $^{12}\text{C}_{15}\text{H}_{16}\text{N}_3$ | 9.5                 |

**Spectrum 113.** HRMS of **8v**.

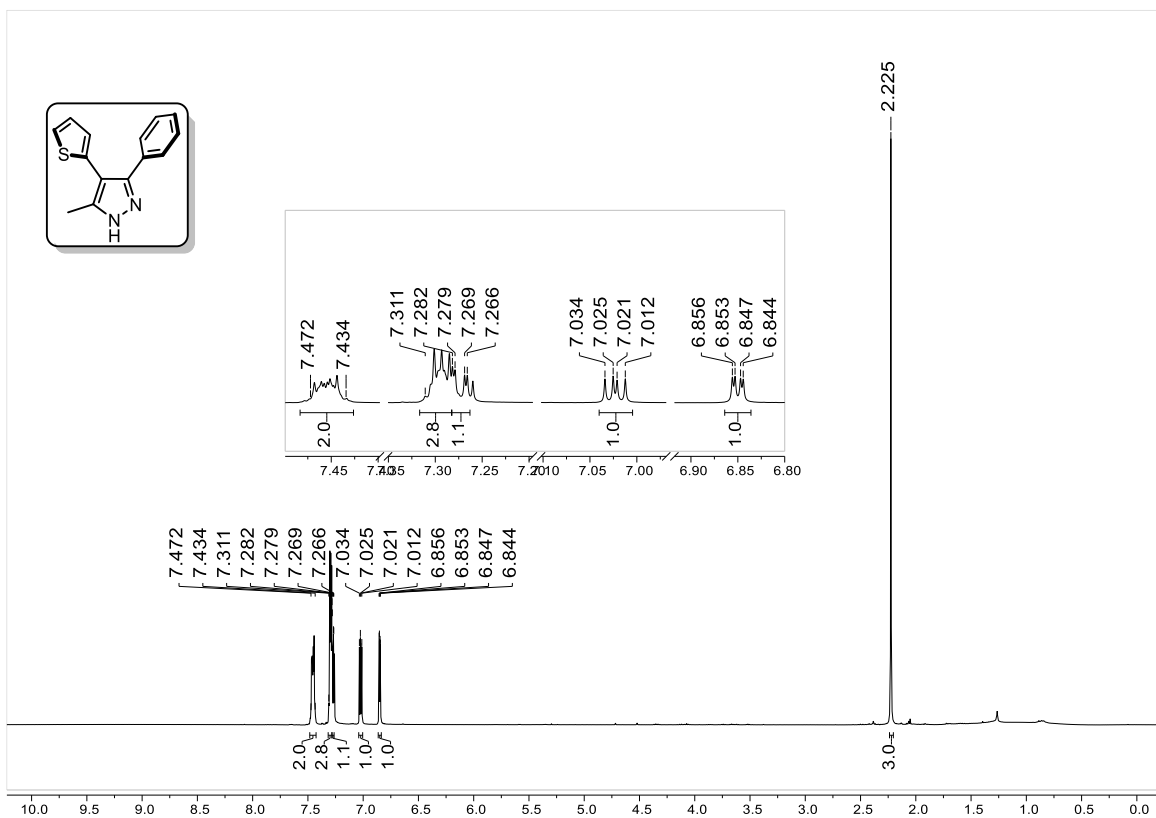

Spectrum 114. <sup>1</sup>H-NMR of 8w.

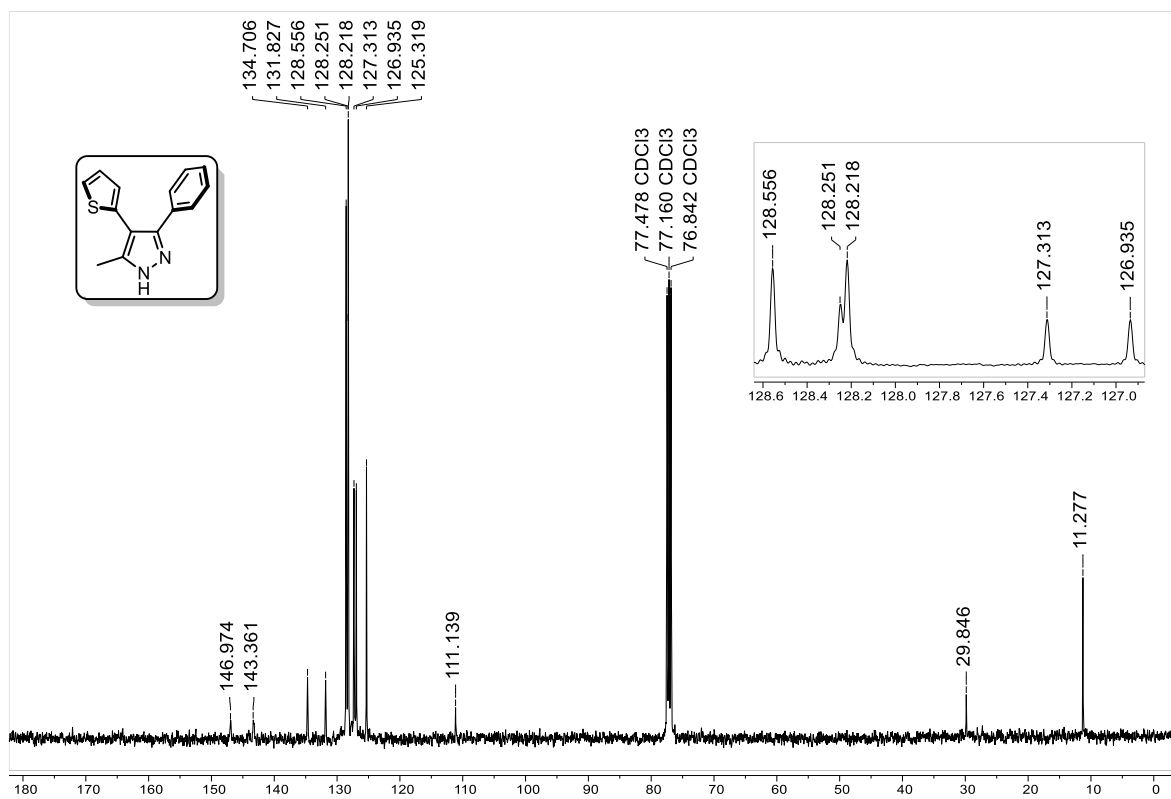

Spectrum 115. <sup>13</sup>C-NMR of 8w.

Description:  
 Ionization Mode:ESI+  
 History:Determine m/z[Peak Detect[Centroid,30,Area];Correct Base[ ];Smooth[5]];Correct Base[5.0%];Average[MS[...

Mass Calibration data:CaI\_PEG\_600  
 Created:3/10/2023 9:16:20 AM  
 Created by:AccuTOF

Charge number:1  
 Element:<sup>12</sup>C:0 .. 14, <sup>1</sup>H:0 .. 50, <sup>35</sup>Cl:0 .. 0, <sup>19</sup>F:0 .. 0, <sup>14</sup>N:0 .. 2, <sup>16</sup>O:0 .. 0, <sup>32</sup>S:0 .. 1  
 Tolerance:50.00(ppm), 5.00 .. 15.00(mmu)

Unsaturation Number:0.0 .. 50.0 (Fraction:Both)

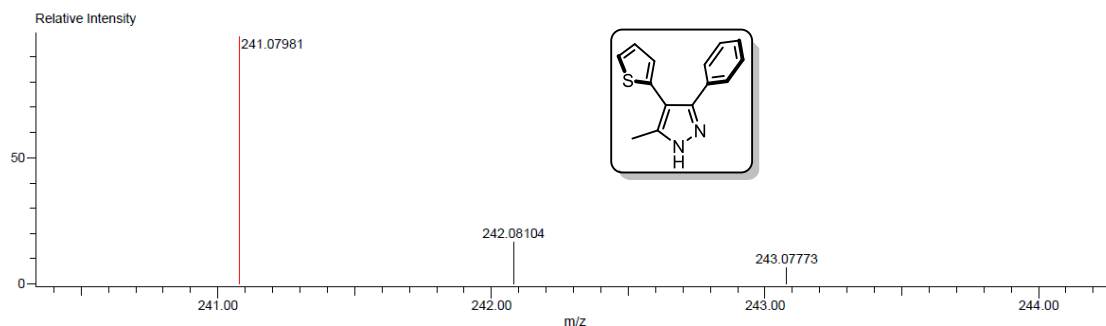

| Mass      | Intensity | Calc. Mass | Mass Difference (mmu) | Mass Difference (ppm) | Possible Formula                                                                                                     | Unsaturation Number |
|-----------|-----------|------------|-----------------------|-----------------------|----------------------------------------------------------------------------------------------------------------------|---------------------|
| 241.07981 | 20510.44  | 241.07994  | -0.13                 | -0.55                 | <sup>12</sup> C <sub>14</sub> <sup>1</sup> H <sub>13</sub> <sup>14</sup> N <sub>2</sub> <sup>32</sup> S <sub>1</sub> | 9.5                 |

**Spectrum 116. HRMS of 8w.**

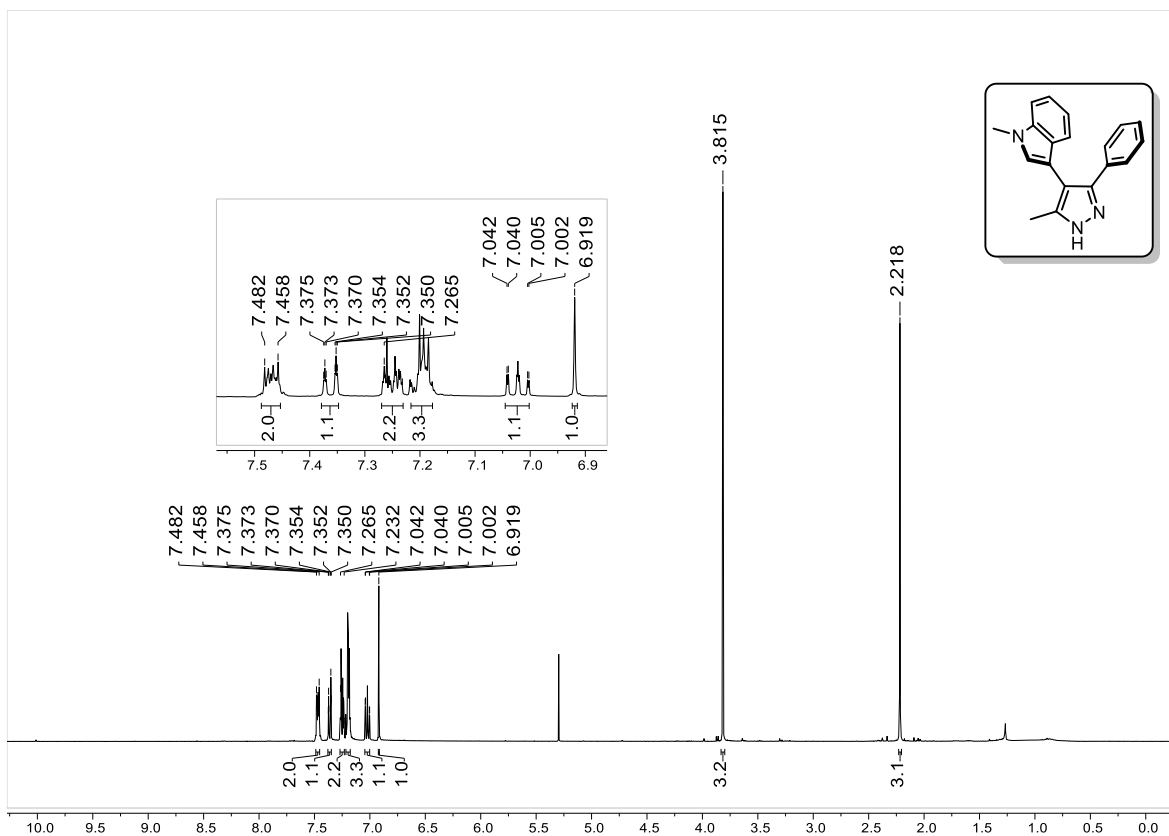

**Spectrum 117. <sup>1</sup>H-NMR of 8x.**

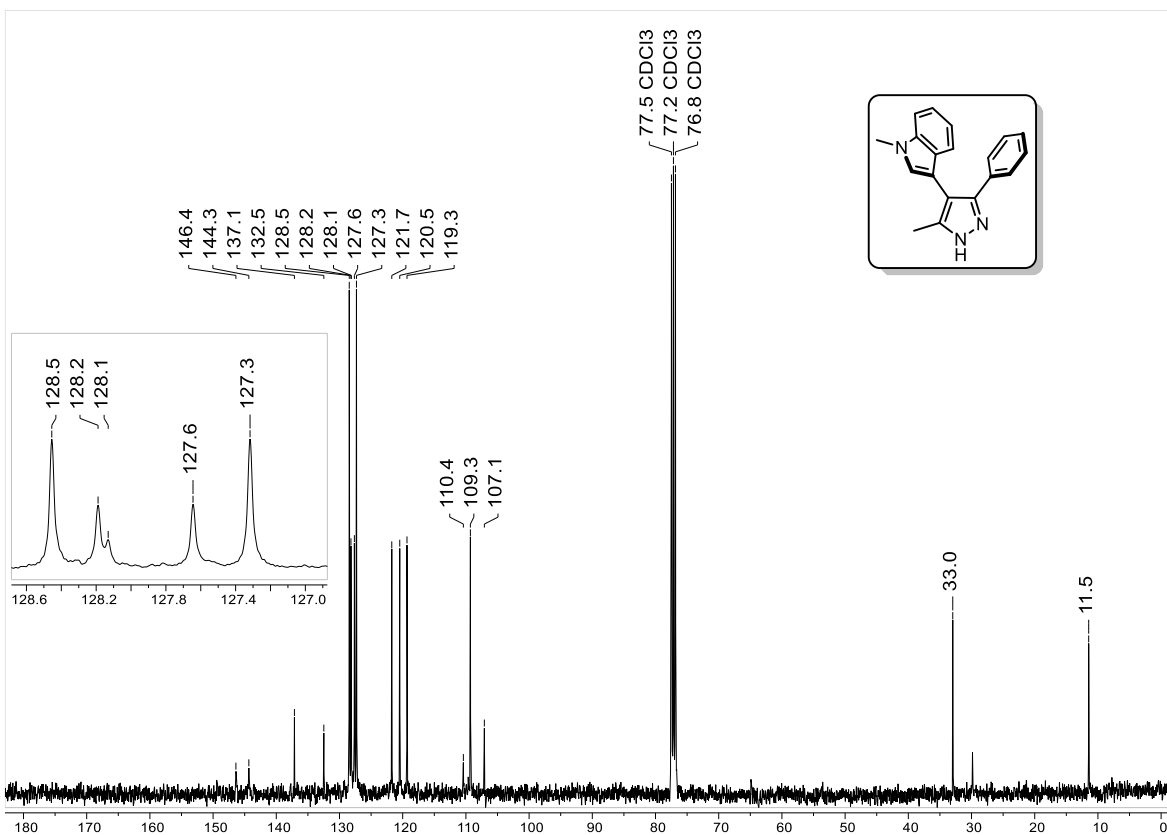

**Spectrum 118.**  $^{13}\text{C}$ -NMR of **8x**.

Description:

Ionization Mode:ESI+

History:Determine m/z[Peak Detect[Centroid,30,Area];Correct Base[];Smooth[5]];Correct Base[5.0%];Average[MS[...

Mass Calibration data:CaI\_PEG\_600

Created:3/1/2023 10:40:03 AM

Created by:AccuTOF

Charge number:1

Tolerance:3.00(mmu)

Unsaturation Number:0.0 .. 30.0 (Fraction:Both)

Element: $^{12}\text{C}$ :0 .. 19,  $^1\text{H}$ :0 .. 20,  $^{79}\text{Br}$ :0 .. 0,  $^{81}\text{Br}$ :0 .. 0,  $^{14}\text{N}$ :0 .. 3,  $^{15}\text{N}$ :0 .. 0,  $^{16}\text{O}$ :0 .. 0,  $^{32}\text{S}$ :0 .. 0

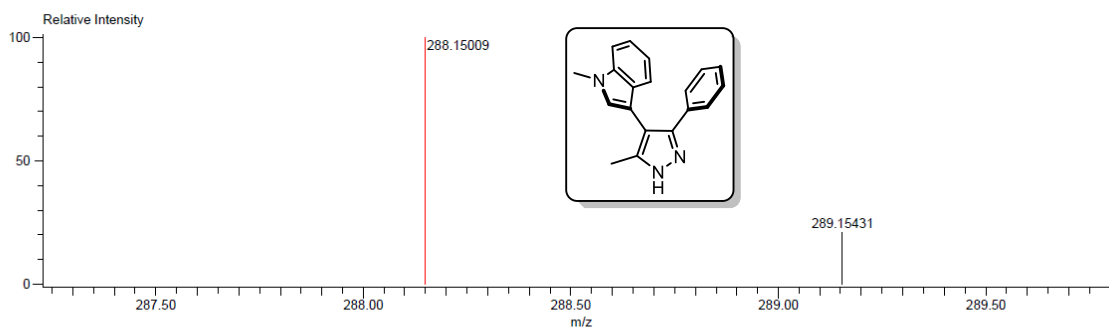

| Mass      | Intensity | Calc. Mass | Mass Difference (mmu) | Mass Difference (ppm) | Possible Formula                            | Unsaturation Number |
|-----------|-----------|------------|-----------------------|-----------------------|---------------------------------------------|---------------------|
| 288.15009 | 208716.91 | 288.15007  | 0.01                  | 0.05                  | $^{12}\text{C}_{19}\text{H}_{18}\text{N}_3$ | 12.5                |

**Spectrum 119.** HRMS of **8x**.

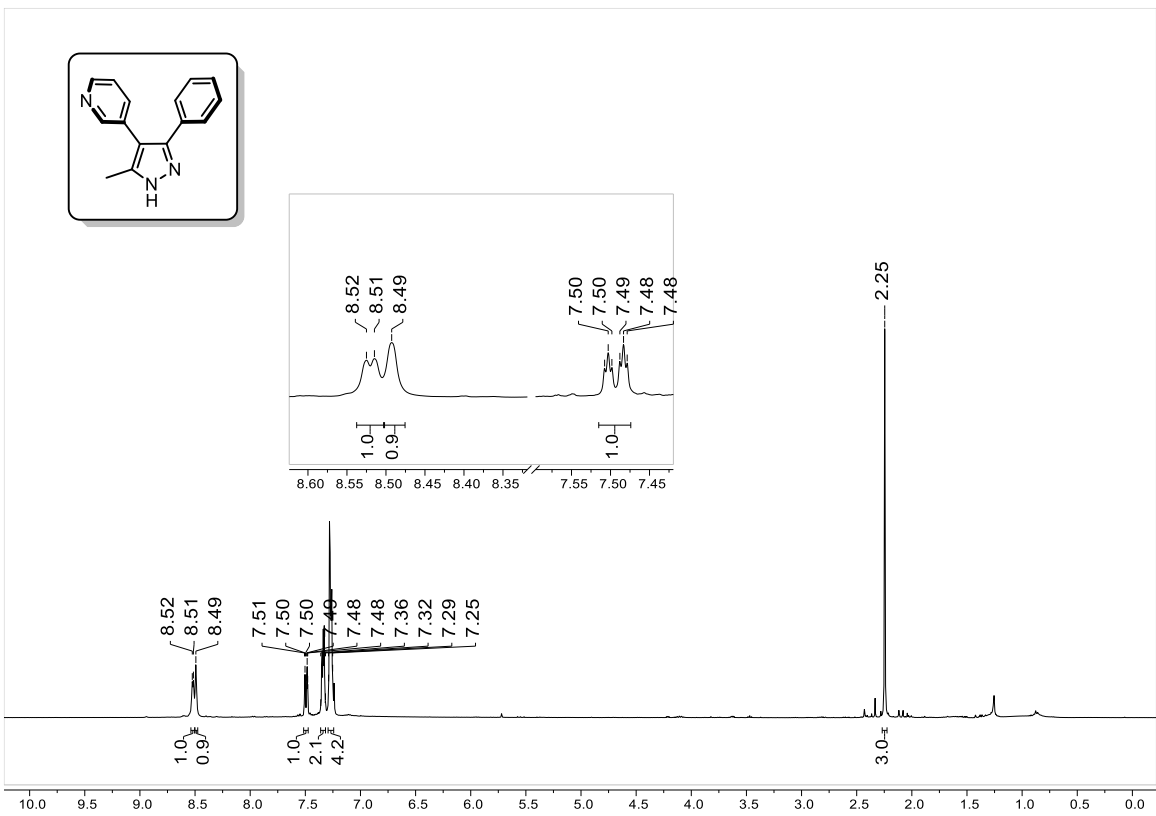

Spectrum 120. <sup>1</sup>H-NMR of 8y.

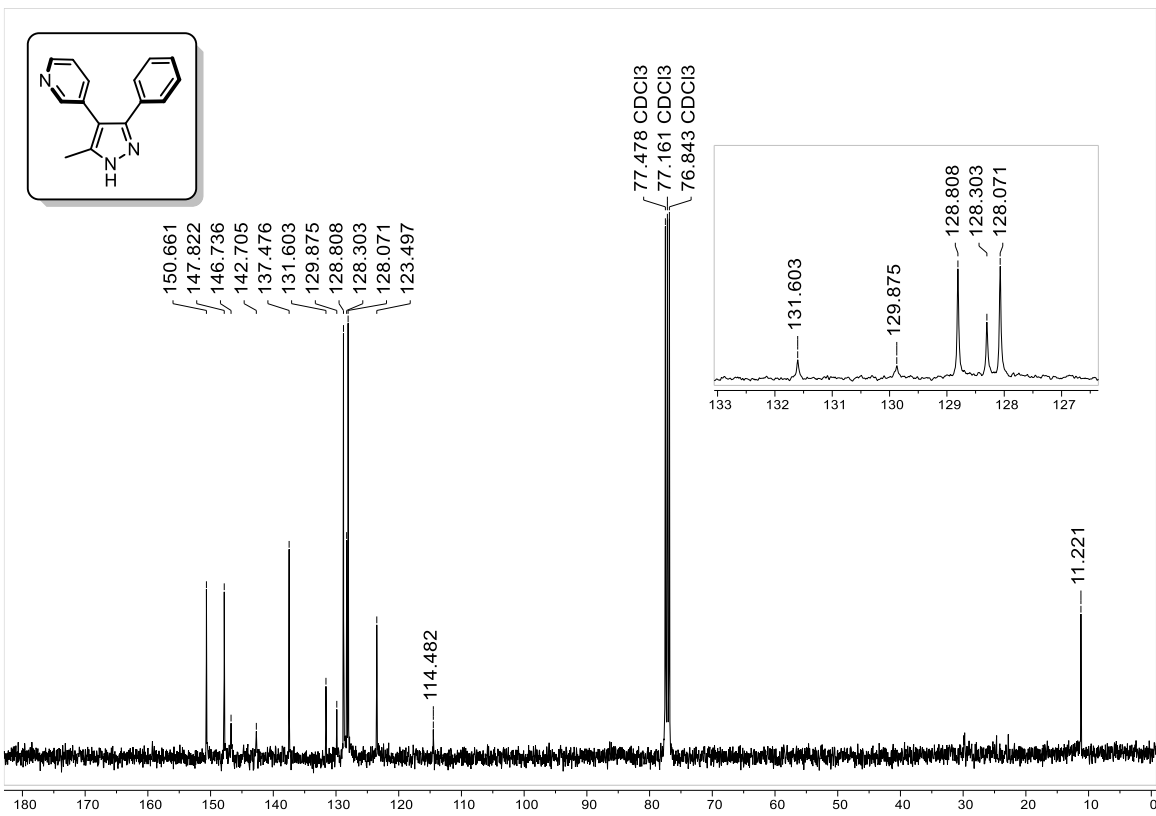

Spectrum 121. <sup>13</sup>C-NMR of 8y.



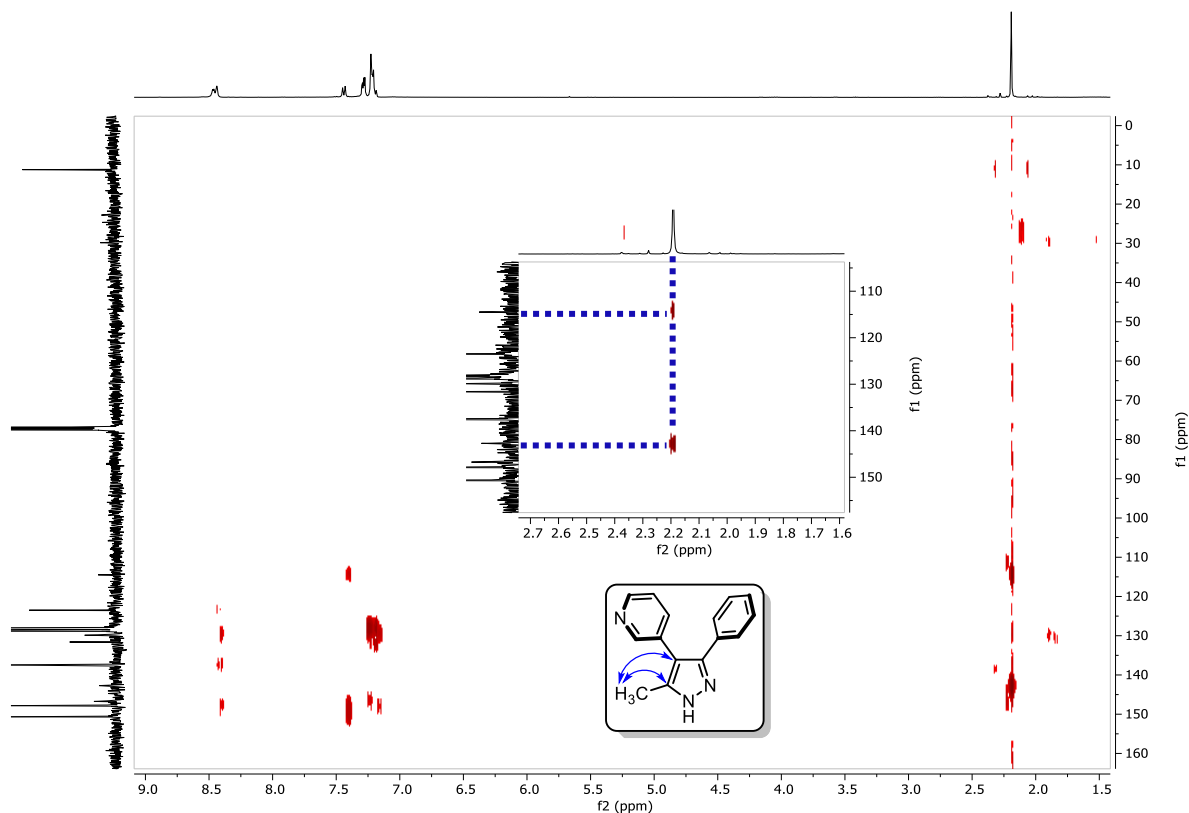

**Spectrum 122.**  $^{13}\text{C}$ -NMR of **8y**.

Description:  
 Ionization Mode:ESI+  
 History:Determine m/z[Peak Detect[Centroid,30,Area];Correct Base[];Smooth[5]];Correct Base[5.0%];Average(MS[...]  
 Charge number:1  
 Element: $^{12}\text{C}$ :0 .. 15,  $^1\text{H}$ :0 .. 22,  $^{79}\text{Br}$ :0 .. 0,  $^{14}\text{N}$ :0 .. 3,  $^{16}\text{O}$ :0 .. 0

Mass Calibration data:Cal\_PEG\_600  
 Created:2/21/2023 10:03:16 AM  
 Created by:AccuTOF

Unsaturat. Number:0.0 .. 30.0 (Fraction:5)

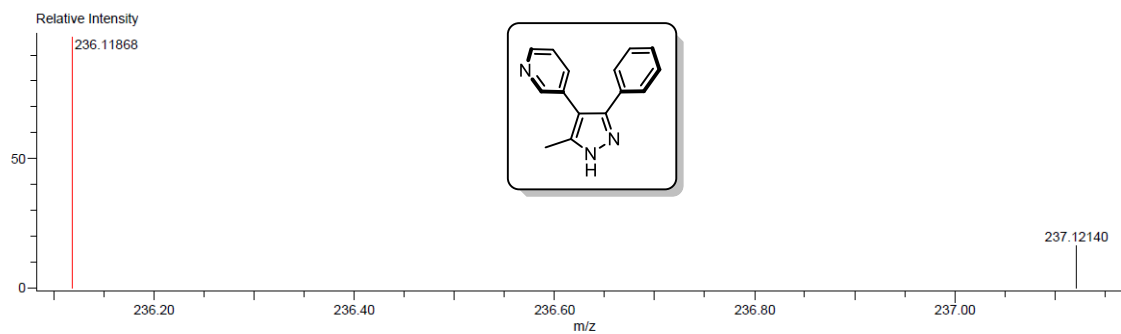

| Mass      | Intensity | Calc. Mass | Mass Difference (mmu) | Mass Difference (ppm) | Possible Formula                            | Unsaturat. Number |
|-----------|-----------|------------|-----------------------|-----------------------|---------------------------------------------|-------------------|
| 236.11868 | 41968.84  | 236.11877  | -0.10                 | -0.41                 | $^{12}\text{C}_{15}\text{H}_{14}\text{N}_3$ | 10.5              |

**Spectrum 123.** HRMS of **8y**.

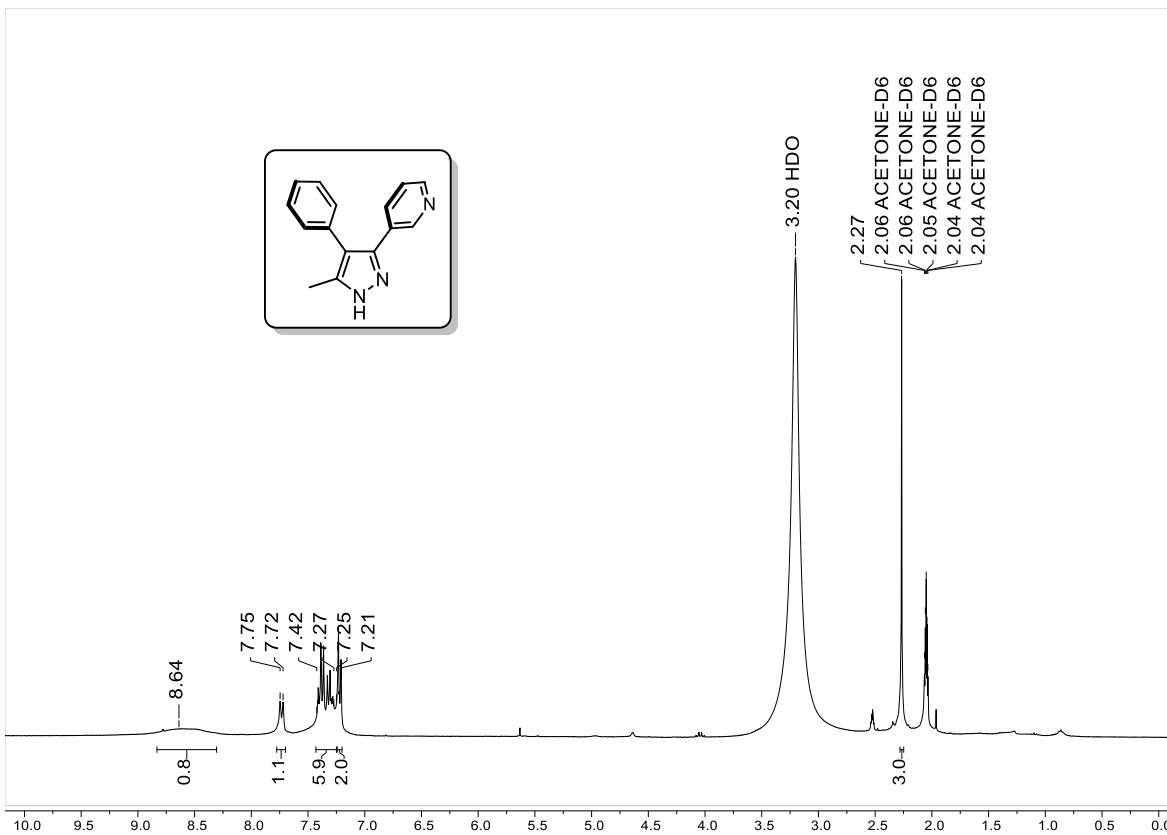

**Spectrum 124.  $^1\text{H-NMR}$  of 8z.**

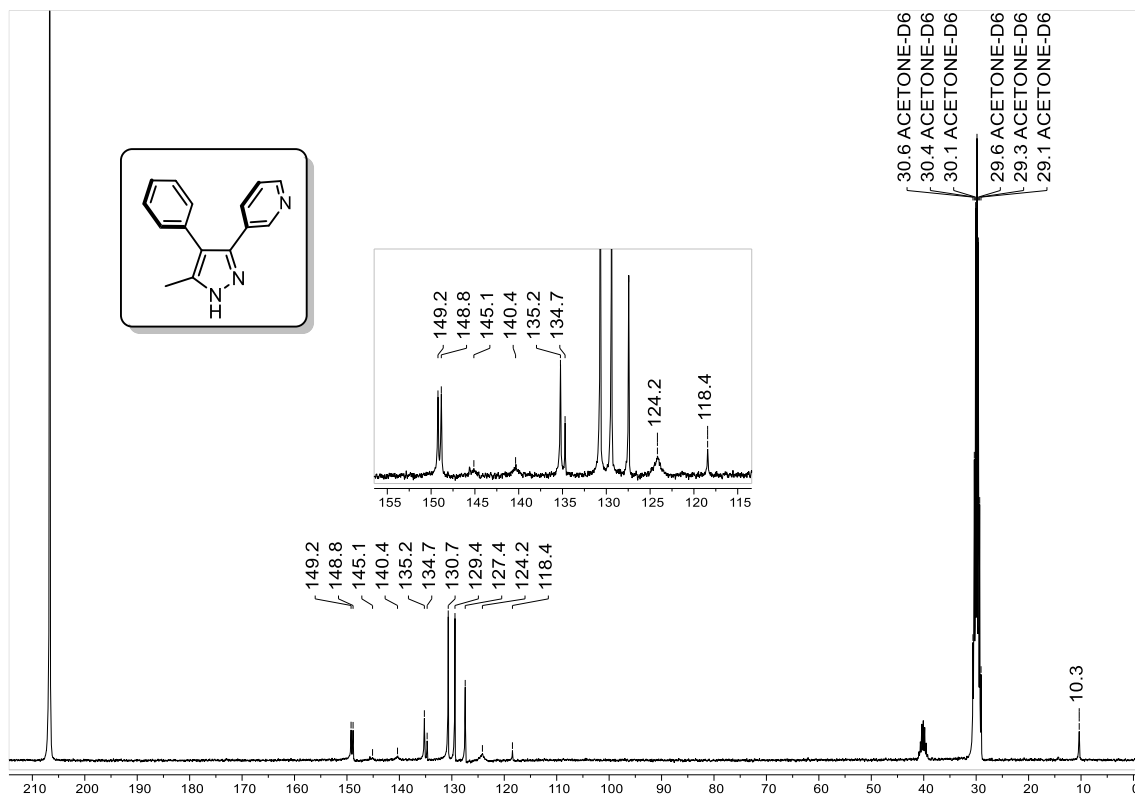

**Spectrum 125.  $^{13}\text{C-NMR}$  of 8z.**

Description:  
 Ionization Mode:ESI+  
 History:Determine m/z[Peak Detect[Centroid,30,Area];Correct Base[];Smooth[5]];Correct Base[5.0%];Average(MS[...]

Charge number:1  
 Element:<sup>12</sup>C:0 .. 15, <sup>1</sup>H:0 .. 22, <sup>35</sup>Cl:0 .. 0, <sup>14</sup>N:3 .. 3, <sup>16</sup>O:0 .. 0

Mass Calibration data:Cal\_PEG\_600  
 Created:1/27/2023 10:29:43 AM  
 Created by:AccuTOF

Tolerance:5.00(ppm), 5.00 .. 15.00(mmu)

Unsaturation Number:0.0 .. 45.0 (Fraction:Both)

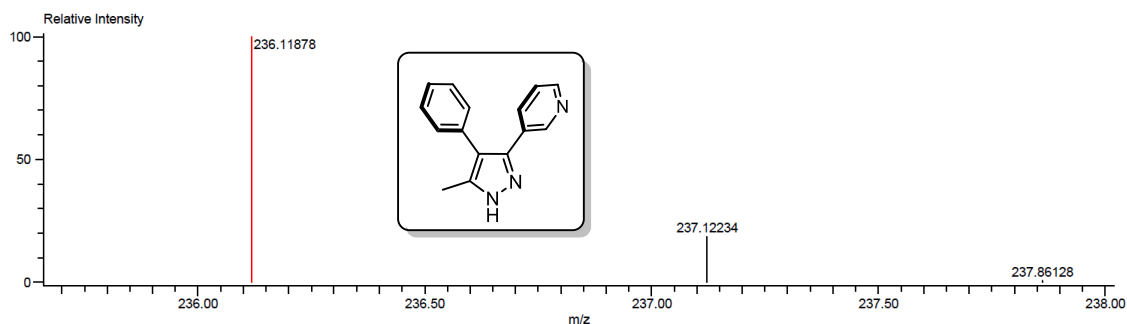

| Mass      | Intensity | Calc. Mass | Mass Difference (mmu) | Mass Difference (ppm) | Possible Formula                                                                        | Unsaturation Number |
|-----------|-----------|------------|-----------------------|-----------------------|-----------------------------------------------------------------------------------------|---------------------|
| 236.11878 | 11340.26  | 236.11877  | 0.01                  | 0.04                  | <sup>12</sup> C <sub>15</sub> <sup>1</sup> H <sub>14</sub> <sup>14</sup> N <sub>3</sub> | 10.5                |

**Spectrum 126. HRMS of 8z.**

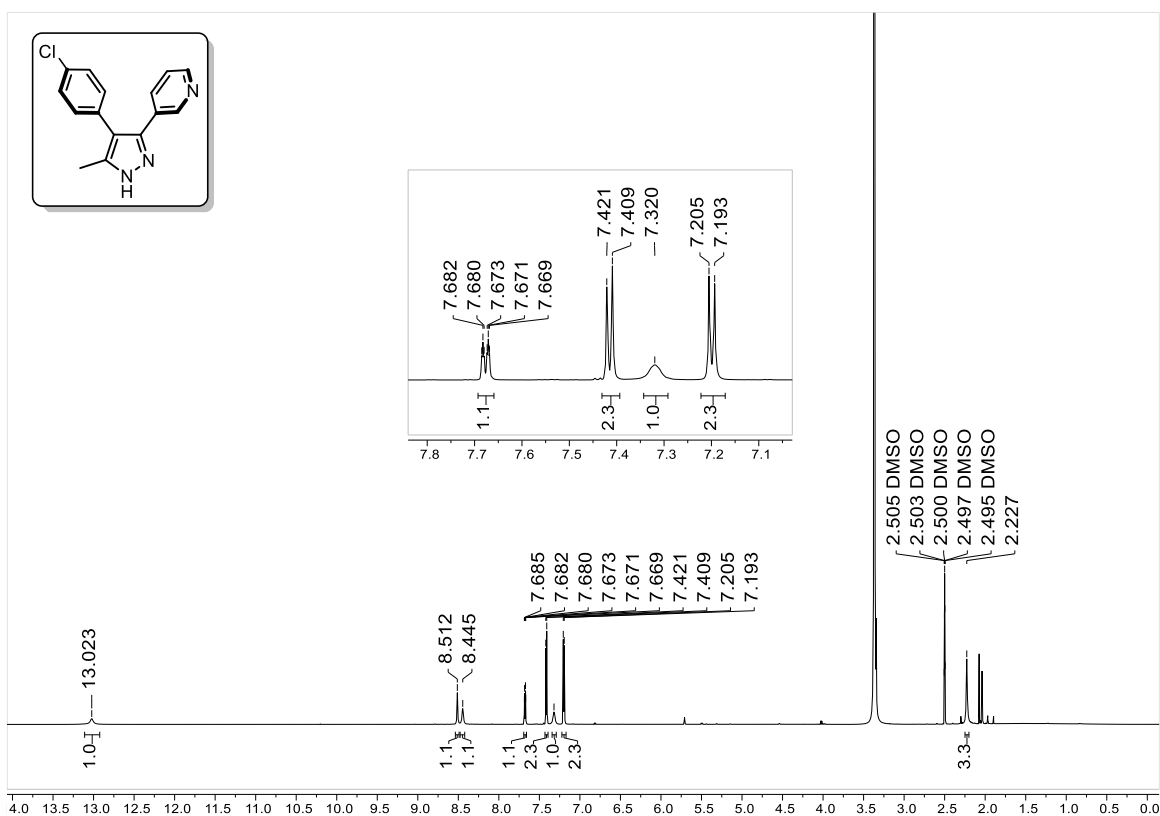

**Spectrum 127. <sup>1</sup>H-NMR of 8aa.**

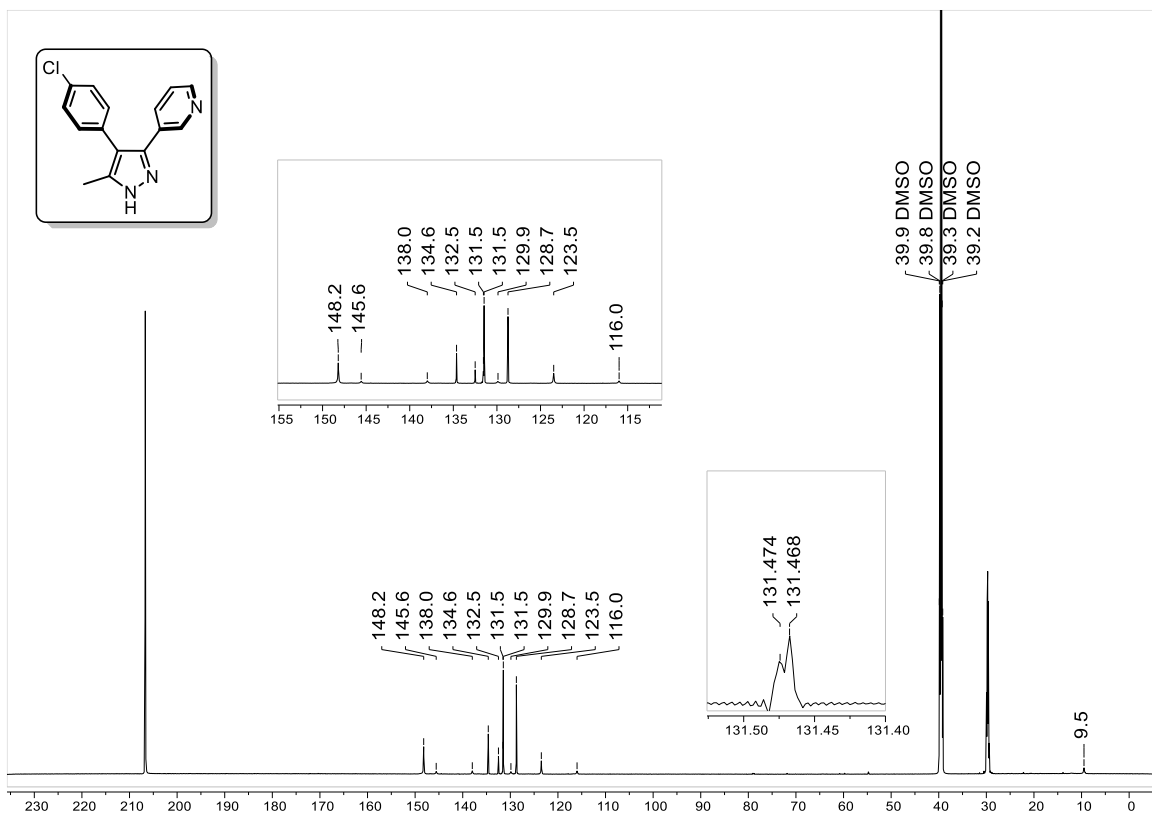

**Spectrum 128. <sup>13</sup>C-NMR of 8aa.**

Description: Ionization Mode: ESI+  
 History: Determine m/z [Peak Detect [Centroid, 30, Area], Correct Base[]; Smooth [5]]; Correct Base [5.0%]; Average [MS] ...

Mass Calibration data: Cal\_PEG\_600  
 Created: 2/2/2023 11:17:31 AM  
 Created by: AccuTOF

Charge number: 1  
 Element: <sup>12</sup>C: 0 .. 15, <sup>1</sup>H: 0 .. 50, <sup>35</sup>Cl: 0 .. 1, <sup>19</sup>F: 0 .. 0, <sup>14</sup>N: 0 .. 3, <sup>18</sup>O: 0 .. 0

Tolerance: 50.00 (ppm), 5.00 .. 15.00 (mmu)  
 Unsaturation Number: 0.0 .. 50.0 (Fraction: 5)

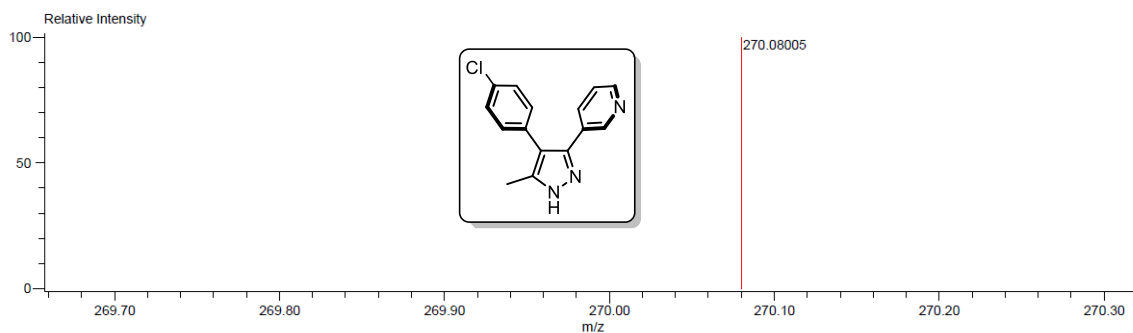

| Mass      | Intensity | Calc. Mass | Mass Difference (mmu) | Mass Difference (ppm) | Possible Formula                                                                                                      | Unsaturation Number |
|-----------|-----------|------------|-----------------------|-----------------------|-----------------------------------------------------------------------------------------------------------------------|---------------------|
| 270.08005 | 4805.12   | 270.07980  | 0.25                  | 0.92                  | <sup>12</sup> C <sub>15</sub> <sup>1</sup> H <sub>13</sub> <sup>35</sup> Cl <sub>1</sub> <sup>14</sup> N <sub>3</sub> | 10.5                |

**Spectrum 129. HRMS of 8aa.**

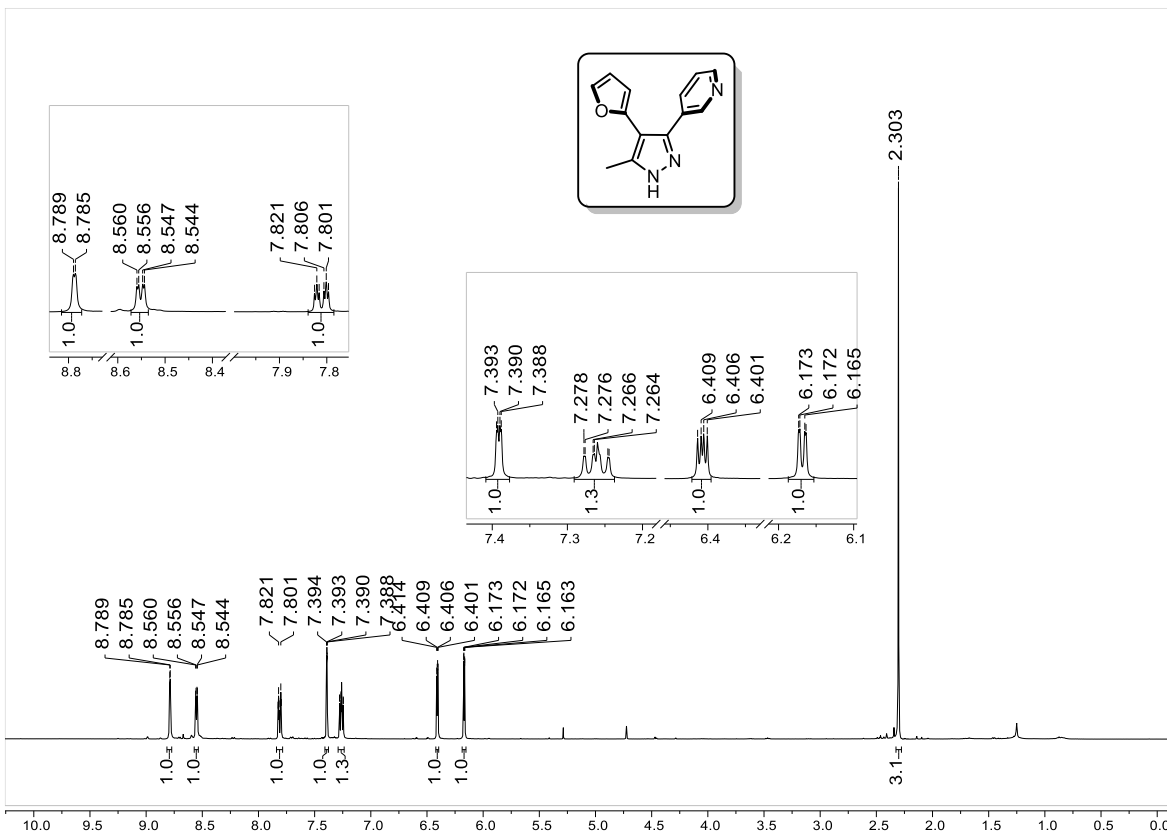

Spectrum 130. <sup>1</sup>H-NMR of 8ab.

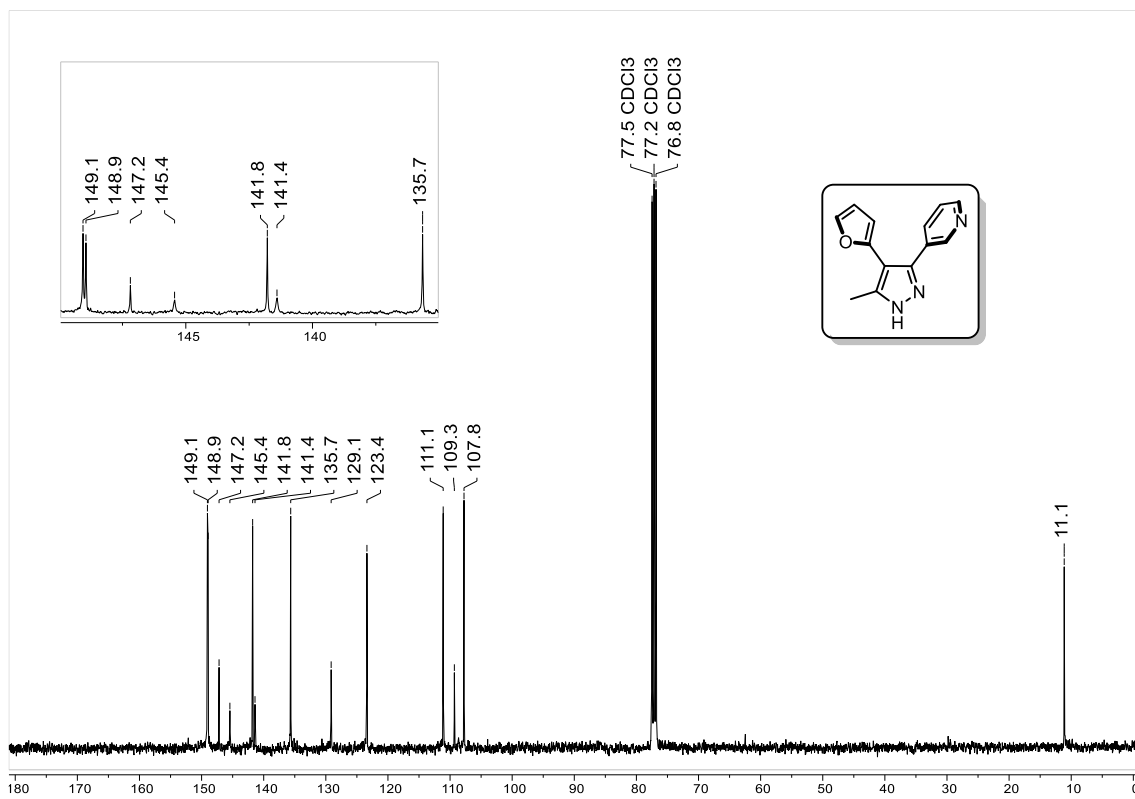

Spectrum 131. <sup>13</sup>C-NMR of 8ab.

Description:  
 Ionization Mode: ESI+  
 History: Determine m/z [Peak Detect [Centroid, 30, Area], Correct Base [], Smooth [5]], Correct Base [5.0%], Average (MS[...

Mass Calibration data: Cal\_PEG\_600  
 Created: 2/27/2023 2:22:47 PM  
 Created by: AccuTOF

Charge number: 1  
 Element:  $^{12}\text{C}$ : 0 .. 13,  $^1\text{H}$ : 0 .. 20,  $^{35}\text{Cl}$ : 0 .. 0,  $^{19}\text{F}$ : 0 .. 0,  $^{14}\text{N}$ : 2 .. 3,  $^{16}\text{O}$ : 0 .. 1

Unsaturat. Number: 0.0 .. 30.0 (Fraction: Both)

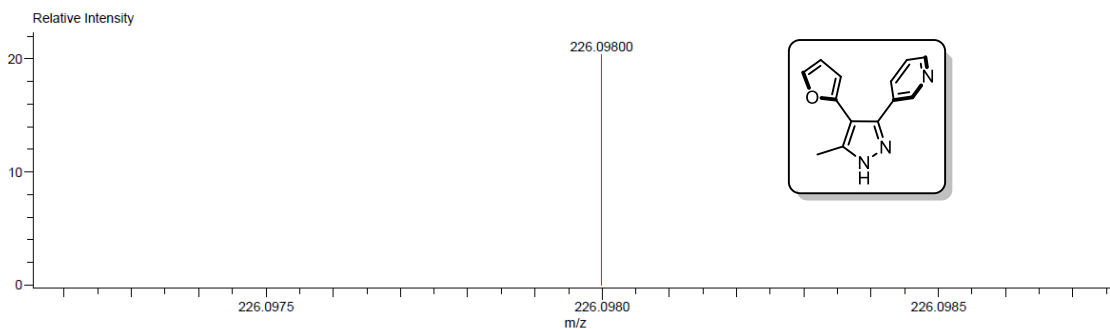

| Mass      | Intensity | Calc. Mass | Mass Difference (mmu) | Mass Difference (ppm) | Possible Formula                                      | Unsaturat. Number |
|-----------|-----------|------------|-----------------------|-----------------------|-------------------------------------------------------|-------------------|
| 226.09800 | 18117.10  | 226.09804  | -0.04                 | -0.17                 | $^{12}\text{C}_{13}\text{H}_{12}\text{N}_3\text{O}_1$ | 9.5               |

**Spectrum 132. HRMS of 8ab.**

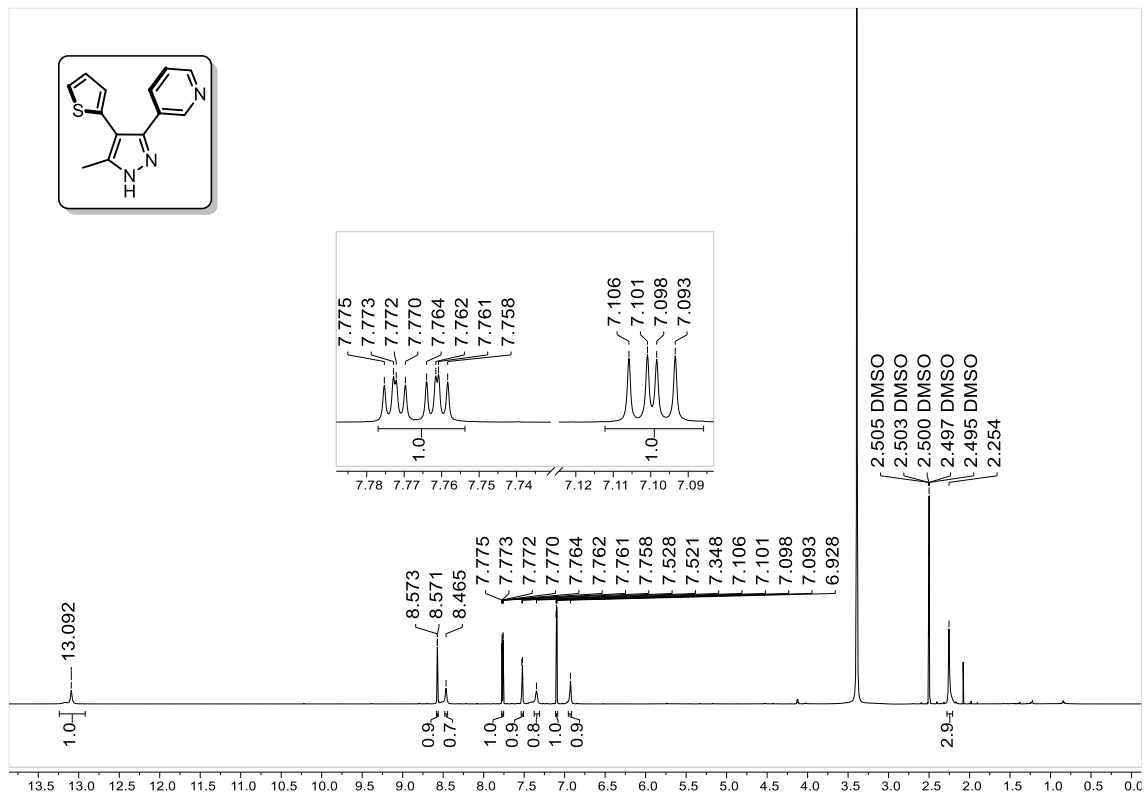

**Spectrum 133.  $^1\text{H}$ -NMR of 8ac.**

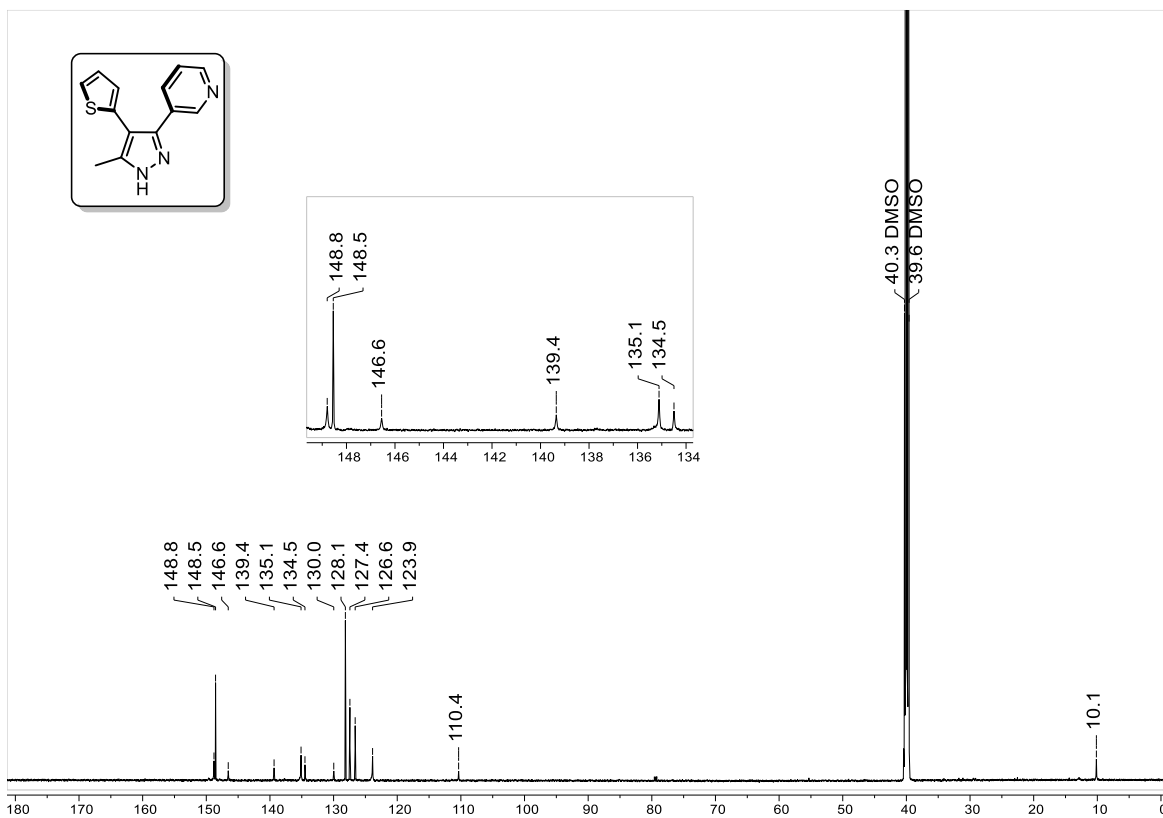

**Spectrum 134. <sup>13</sup>C-NMR of 8ac.**

Description: Ionization Mode: ESI+  
 History: Determine m/z [Peak Detect [Centroid, 30, Area], Correct Base [], Smooth [5]], Correct Base [5.0%], Average (MS...  
 Mass Calibration data: Cal\_PEG\_600  
 Created: 3/17/2023 11:26:55 AM  
 Created by: AccuTOF

Charge number: 1  
 Element: <sup>12</sup>C: 0 .. 13, <sup>1</sup>H: 0 .. 18, <sup>14</sup>N: 0 .. 3, <sup>32</sup>S: 1 .. 1  
 Tolerance: 5.00 (mmu)  
 Unsaturation Number: 0.0 .. 50.0 (Fraction: Both)

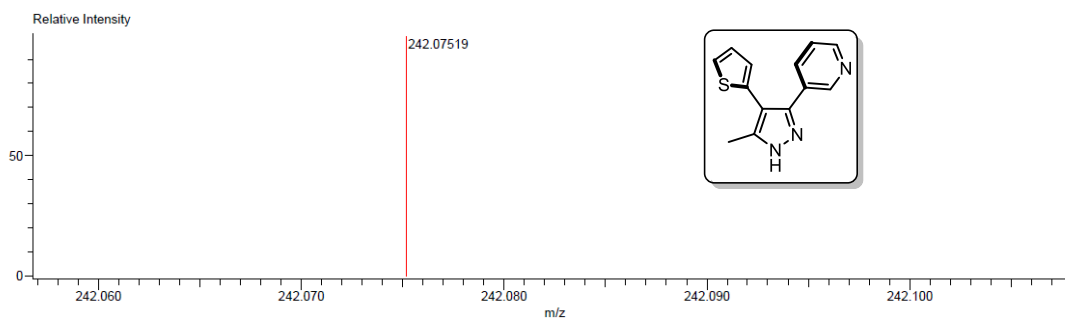

| Mass      | Intensity | Calc. Mass | Mass Difference (mmu) | Mass Difference (ppm) | Possible Formula                                                                                                     | Unsaturation Number |
|-----------|-----------|------------|-----------------------|-----------------------|----------------------------------------------------------------------------------------------------------------------|---------------------|
| 242.07519 | 11321.62  | 242.07519  | 0.00                  | -0.01                 | <sup>12</sup> C <sub>13</sub> <sup>1</sup> H <sub>12</sub> <sup>14</sup> N <sub>3</sub> <sup>32</sup> S <sub>1</sub> | 10.5                |

**Spectrum 135. HRMS of 8ac.**

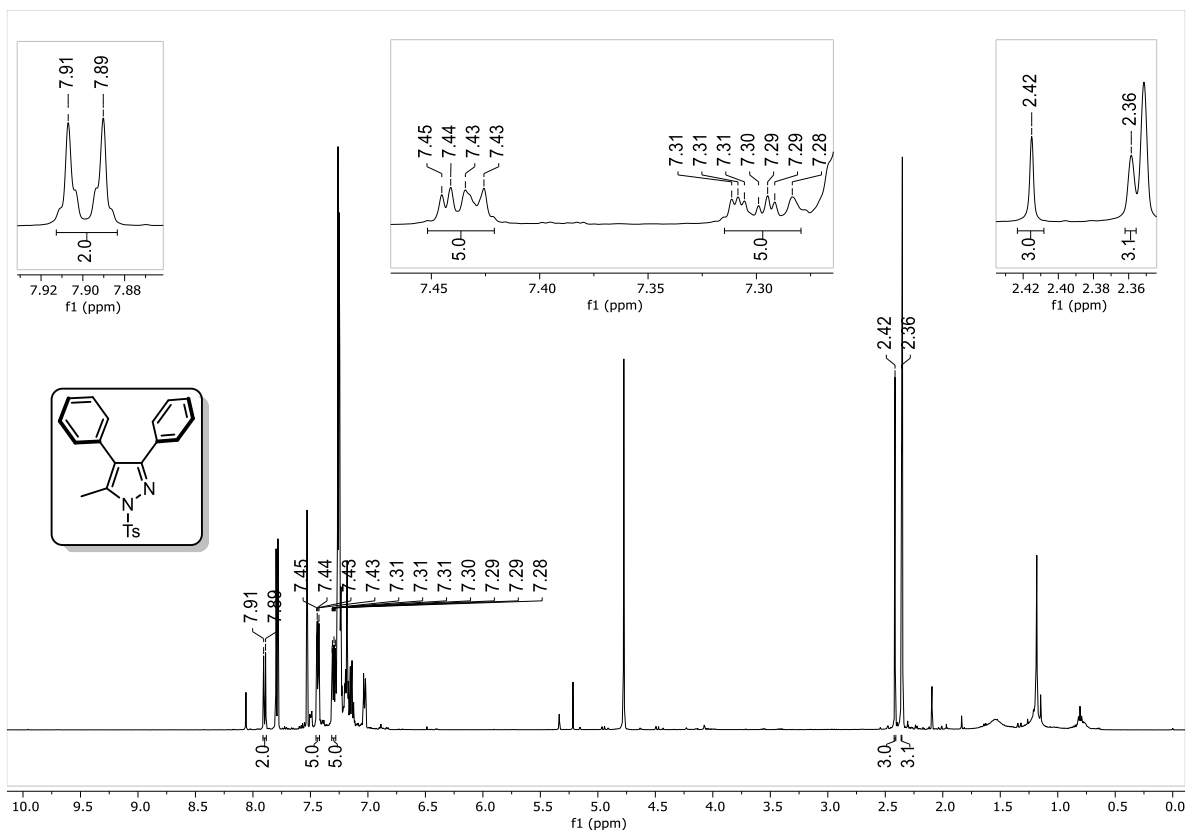

**Spectrum 136. <sup>1</sup>H-NMR of 9.**

Description:  
 Ionization Mode:ESI+  
 History:Determine m/z[Peak Detect[Centroid,30,Area];Correct Base[];Smooth[5]];Correct Base[5.0%];Average[MS[...

Mass Calibration data:Cal\_PEG\_600  
 Created:6/14/2023 9:50:50 AM  
 Created by:AccuTOF

Charge number:1  
 Element:<sup>12</sup>C:0 .. 23, <sup>1</sup>H:0 .. 25, <sup>14</sup>N:0 .. 2, <sup>16</sup>O:2 .. 2, <sup>32</sup>S:0 .. 1  
 Tolerance:4.00(mmu)

Unsaturation Number:-1.0 .. 60.0 (Fraction:Both)

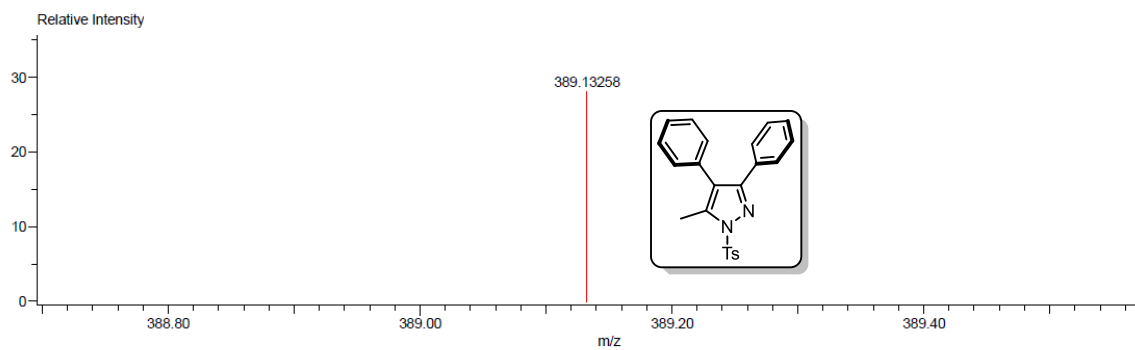

| Mass      | Intensity | Calc. Mass | Mass Difference (mmu) | Mass Difference (ppm) | Possible Formula                                                                                                                                  | Unsaturation Number |
|-----------|-----------|------------|-----------------------|-----------------------|---------------------------------------------------------------------------------------------------------------------------------------------------|---------------------|
| 389.13258 | 246534.04 | 389.13237  | 0.20                  | 0.52                  | <sup>12</sup> C <sub>23</sub> <sup>1</sup> H <sub>21</sub> <sup>14</sup> N <sub>2</sub> <sup>16</sup> O <sub>2</sub> <sup>32</sup> S <sub>1</sub> | 15.5                |

**Spectrum 137. HRMS of 9.**



Description:  
Ionization Mode:ESI+  
History:Determine m/z[Peak Detect[Centroid,30,Area],Correct Base[],Smooth[5]];Correct Base[5.0%];Average(MS[...

Mass Calibration data:Cal\_PEG\_600  
Created:6/14/2023 3:22:25 PM  
Created by:AccuTOF

Charge number:1  
Element:<sup>12</sup>C:0 .. 15, <sup>1</sup>H:0 .. 13, <sup>14</sup>N:0 .. 2, <sup>16</sup>O:0 .. 0

Tolerance:3.00(mmu)

Unsaturation Number:-1.0 .. 60.0 (Fraction:Both)

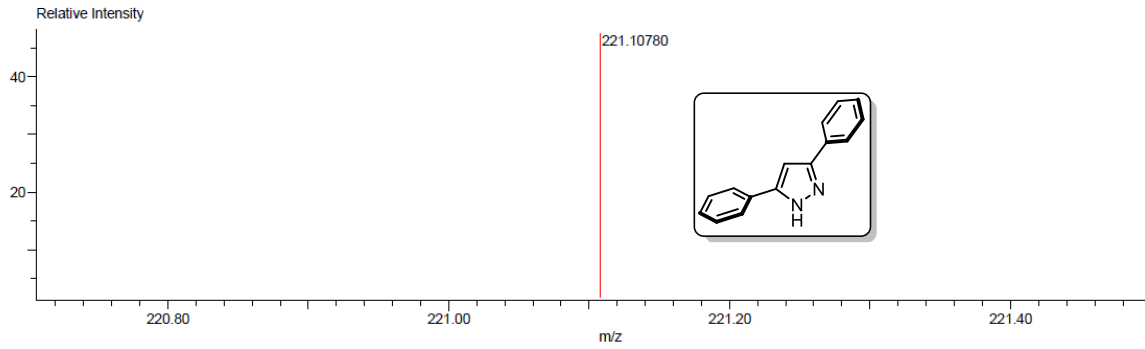

| Mass      | Intensity | Calc. Mass | Mass Difference (mmu) | Mass Difference (ppm) | Possible Formula                                                                        | Unsaturation Number |
|-----------|-----------|------------|-----------------------|-----------------------|-----------------------------------------------------------------------------------------|---------------------|
| 221.10780 | 11449.31  | 221.10787  | -0.07                 | -0.34                 | <sup>12</sup> C <sub>15</sub> <sup>1</sup> H <sub>13</sub> <sup>14</sup> N <sub>2</sub> | 10.5                |

**Spectrum 138. HRMS of 11.**

## Comparative TLC of the methodologies.

---

---

Although Tang's and our conditions are similar, TLC outcomes reveal a different pattern. In our methodology, the 3,4-diaryl-1*H*-pyrazole ( $R_f = 0.06$ ; Hex-AcOEt 8:2) is more polar than the 3,5-isomer ( $R_f = 0.48$ ), which was obtained only traces (< 5%). It is noteworthy to mention that the yield of 3,4-regioisomer decreases when our protocol is carried out at 80 °C, while 3,5-regioisomer increases (Figure S1).

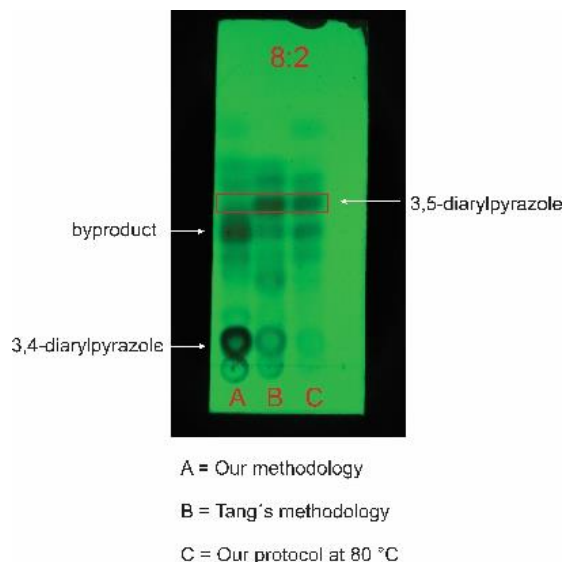

**Figure S1.** Comparative TLC of the methodologies (Eluent: Hex-AcOEt 8:2).

To bring a proof about the mechanism of 3,4-aza-heterocyclic synthesis, we tested our conditions without base ( $K_2CO_3$ ). The result indicated the importance of the base for converting the *N*-tosylhydrazones to the corresponding diazo compounds; thus, the reaction proceeds *via* a [3+2] cycloaddition. Moreover, we identified that the most abundant byproduct as the tosylated pyrazole.

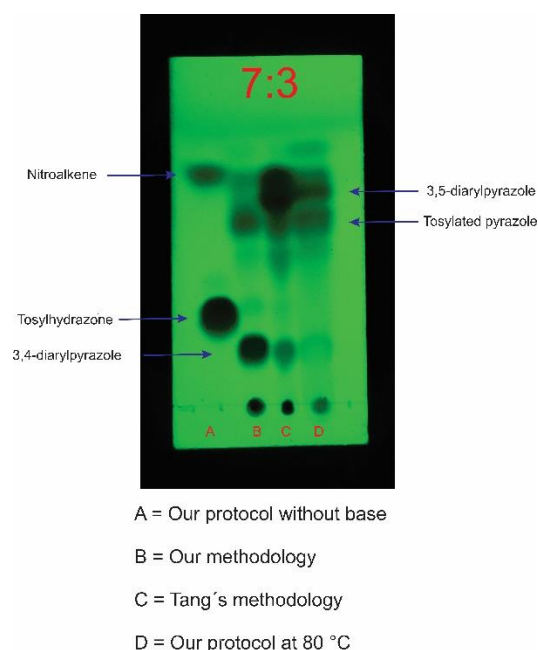

**Figure S2.** Comparative TLC of the methodologies (Eluent: Hex-AcOEt 7:3).

## X-Ray Data.

---

---

**Table S1.** X-ray data.

---

|                                   |                                                   |                    |
|-----------------------------------|---------------------------------------------------|--------------------|
| Identification code               | 089HVE23                                          |                    |
| Empirical formula                 | C <sub>15</sub> H <sub>12</sub> Cl N <sub>3</sub> |                    |
| Formula weight                    | 269.73                                            |                    |
| Temperature                       | 100(2) K                                          |                    |
| Wavelength                        | 0.71073 Å                                         |                    |
| Crystal system                    | Monoclinic                                        |                    |
| Space group                       | P2 <sub>1</sub> /c                                |                    |
| Unit cell dimensions              | a = 14.1324(5) Å                                  | α = 90°.           |
|                                   | b = 8.3919(3) Å                                   | β = 103.5870(10)°. |
|                                   | c = 11.1269(4) Å                                  | γ = 90°.           |
| Volume                            | 1282.69(8) Å <sup>3</sup>                         |                    |
| Z                                 | 4                                                 |                    |
| Density (calculated)              | 1.397 Mg/m <sup>3</sup>                           |                    |
| Absorption coefficient            | 0.286 mm <sup>-1</sup>                            |                    |
| F(000)                            | 560                                               |                    |
| Crystal size                      | 0.360 x 0.261 x 0.208 mm <sup>3</sup>             |                    |
| Theta range for data collection   | 2.844 to 27.948°.                                 |                    |
| Index ranges                      | -18<=h<=18, -11<=k<=11, -14<=l<=14                |                    |
| Reflections collected             | 18891                                             |                    |
| Independent reflections           | 3087 [R(int) = 0.0187]                            |                    |
| Completeness to theta = 25.242°   | 99.9 %                                            |                    |
| Absorption correction             | Semi-empirical from equivalents                   |                    |
| Max. and min. transmission        | 0.7456 and 0.7186                                 |                    |
| Refinement method                 | Full-matrix least-squares on F <sup>2</sup>       |                    |
| Data / restraints / parameters    | 3087 / 1 / 176                                    |                    |
| Goodness-of-fit on F <sup>2</sup> | 1.070                                             |                    |
| Final R indices [I>2sigma(I)]     | R1 = 0.0304, wR2 = 0.0845                         |                    |
| R indices (all data)              | R1 = 0.0323, wR2 = 0.0861                         |                    |
| Largest diff. peak and hole       | 0.407 and -0.222 e.Å <sup>-3</sup>                |                    |

---

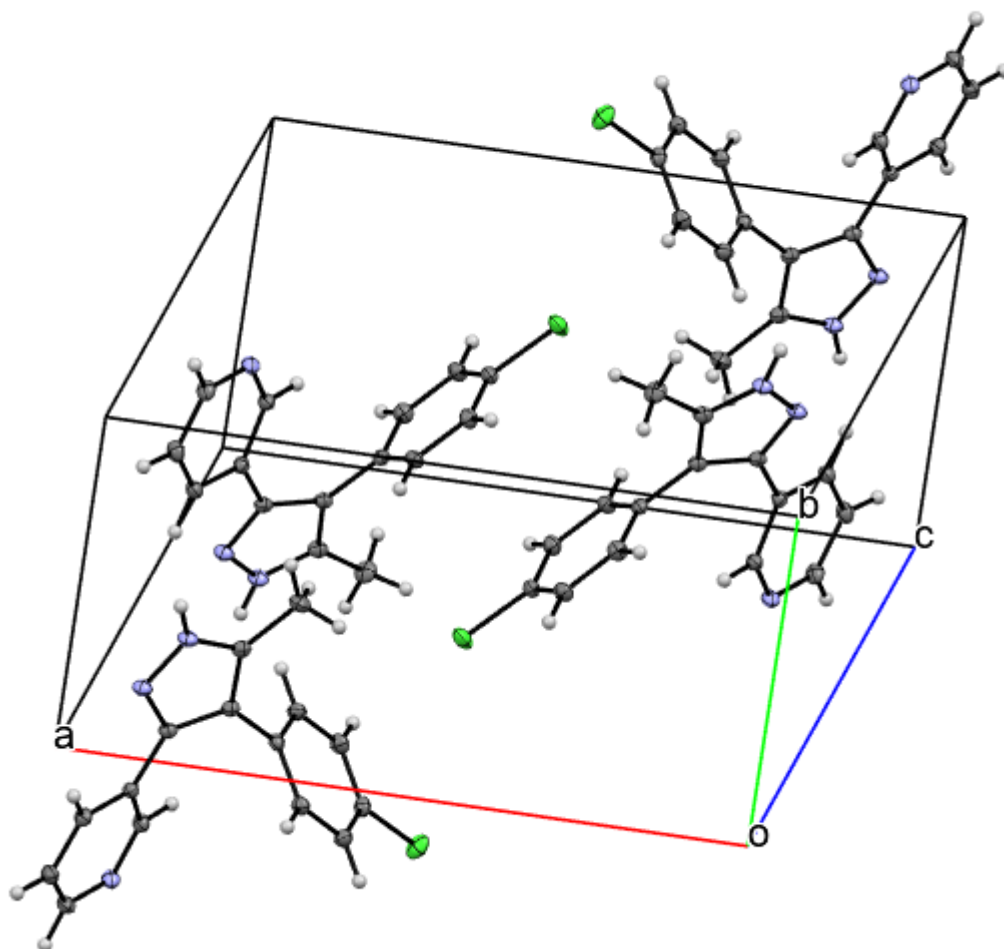

**Figure S3.** X-Ray of **8aa**.

Coordinates of optimized geometries.

---

---

## Nitroalkene (6a).

@<TRIPOS>MOLECULE

21 21

SMALL

NO\_CHARGES

@<TRIPOS>ATOM

|    |     |         |         |         |   |
|----|-----|---------|---------|---------|---|
| 1  | C1  | -3.7717 | 0.1353  | 0.0155  | C |
| 2  | C2  | -3.2296 | -1.1239 | 0.2943  | C |
| 3  | C3  | -1.8505 | -1.3157 | 0.2381  | C |
| 4  | C4  | -0.9791 | -0.2471 | -0.0677 | C |
| 5  | C5  | -1.5427 | 1.0120  | -0.3651 | C |
| 6  | C6  | -2.9247 | 1.1958  | -0.3245 | C |
| 7  | H7  | -4.8468 | 0.2864  | 0.0482  | H |
| 8  | H8  | -3.8805 | -1.9565 | 0.5448  | H |
| 9  | H9  | -1.4323 | -2.2979 | 0.4415  | H |
| 10 | H10 | -0.9097 | 1.8387  | -0.6648 | H |
| 11 | H11 | -3.3425 | 2.1686  | -0.5673 | H |
| 12 | C12 | 0.4528  | -0.5442 | -0.0989 | C |
| 13 | C13 | 1.5067  | 0.2822  | 0.0863  | C |
| 14 | H14 | 0.6963  | -1.5879 | -0.2748 | H |
| 15 | N15 | 2.8346  | -0.3380 | -0.0696 | N |
| 16 | O16 | 2.9358  | -1.5514 | -0.3012 | O |
| 17 | O17 | 3.8190  | 0.4075  | 0.0335  | O |
| 18 | C18 | 1.5375  | 1.7302  | 0.4586  | C |
| 19 | H19 | 1.7567  | 2.3724  | -0.4024 | H |
| 20 | H20 | 0.5749  | 2.0279  | 0.8762  | H |
| 21 | H21 | 2.3106  | 1.9171  | 1.2075  | H |

@<TRIPOS>BOND

1 1 2 Ar  
2 1 6 Ar  
3 1 7 1  
4 2 3 Ar  
5 2 8 1  
6 3 4 Ar  
7 3 9 1  
8 4 5 Ar  
9 4 12 1  
10 5 6 Ar  
11 5 10 1  
12 6 11 1  
13 12 13 2  
14 12 14 1  
15 13 15 1  
16 13 18 1  
17 15 16 Ar  
18 15 17 Ar  
19 18 19 1  
20 18 20 1  
21 18 21 1

## Diazo compound.

@<TRIPOS>MOLECULE

15 15

SMALL

NO\_CHARGES

@<TRIPOS>ATOM

|   |    |         |         |         |   |
|---|----|---------|---------|---------|---|
| 1 | C1 | -0.1288 | -0.3729 | 0.0000  | C |
| 2 | C2 | 0.9303  | -1.3039 | -0.0000 | C |
| 3 | C3 | 0.1822  | 1.0026  | 0.0000  | C |
| 4 | C4 | 2.2563  | -0.8713 | -0.0000 | C |
| 5 | H5 | 0.7062  | -2.3674 | -0.0000 | H |
| 6 | C6 | -1.4979 | -0.8781 | 0.0000  | C |
| 7 | C7 | 1.5116  | 1.4258  | 0.0000  | C |
| 8 | H8 | -0.6138 | 1.7427  | 0.0000  | H |
| 9 | C9 | 2.5572  | 0.4954  | -0.0000 | C |



10 H10 3.0570 -1.6061 -0.0000 H  
11 H11 -1.7300 -1.9370 0.0001 H  
12 H12 1.7308 2.4902 0.0000 H  
13 H13 3.5903 0.8304 -0.0000 H  
14 N14 -2.5235 -0.0826 0.0000 N  
15 N15 -3.4202 0.6342 -0.0000 N

@<TRIPOS>BOND

1 1 2 Ar  
2 1 3 Ar  
3 1 6 1  
4 2 4 Ar  
5 2 5 1  
6 3 7 Ar  
7 3 8 1  
8 4 9 Ar  
9 4 10 1  
10 6 11 1  
11 6 14 2  
12 7 9 Ar  
13 7 12 1  
14 9 13 1  
15 14 15 2

## TS-1.

@<TRIPOS>MOLECULE

36 38

SMALL

NO\_CHARGES

@<TRIPOS>ATOM

1 C1 3.3870 -2.9826 -0.2050 C  
2 C2 2.6110 -2.7105 -1.3351 C  
3 C3 1.7508 -1.6096 -1.3472 C  
4 C4 1.6600 -0.7477 -0.2389 C  
5 C5 2.4339 -1.0442 0.8981 C  
6 C6 3.2900 -2.1471 0.9129 C  
7 H7 4.0542 -3.8397 -0.1910 H  
8 H8 2.6690 -3.3563 -2.2069 H  
9 H9 2.3594 -0.4236 1.7859 H  
10 H10 3.8774 -2.3570 1.8025 H  
11 C11 0.7212 0.4088 -0.3366 C  
12 C12 1.1231 1.7488 -0.1544 C  
13 H13 -0.0274 0.2867 -1.1130 H  
14 N14 0.3317 2.7315 -0.8427 N  
15 O15 -0.8003 2.4248 -1.2798 O  
16 O16 0.8047 3.8781 -0.9774 O  
17 C17 2.4492 2.2454 0.3440 C  
18 H18 2.3387 3.1620 0.9276 H  
19 H19 2.9307 1.4941 0.9681 H  
20 H20 3.1240 2.4702 -0.4922 H  
21 C21 -1.9681 -0.5788 0.6024 C  
22 C22 -2.1461 -1.9724 0.5604 C  
23 C23 -2.9578 0.2590 0.0579 C  
24 C24 -3.2925 -2.5196 -0.0193 C  
25 H25 -1.3865 -2.6243 0.9834 H  
26 C26 -0.7074 -0.0513 1.1693 C  
27 C27 -4.1078 -0.2928 -0.5048 C  
28 H28 -2.8236 1.3362 0.0685 H  
29 C29 -4.2781 -1.6821 -0.5494 C  
30 H30 -3.4185 -3.5981 -0.0472 H  
31 H31 -0.1504 -0.7555 1.7869 H  
32 H32 -4.8701 0.3627 -0.9159 H  
33 H33 -5.1738 -2.1070 -0.9932 H  
34 N34 -0.7189 1.1786 1.7702 N  
35 N35 -0.2550 2.2317 1.7577 N  
36 H36 1.1469 -1.4079 -2.2280 H

@<TRIPOS>BOND

1 1 2 Ar  
2 1 6 Ar

3 1 7 1  
4 2 3 Ar  
5 2 8 1  
6 3 4 Ar  
7 3 36 1  
8 4 5 Ar  
9 4 11 1  
10 5 6 Ar  
11 5 9 1  
12 6 10 1  
13 11 12 Ar  
14 11 13 1  
15 11 26 Wk  
16 12 14 1  
17 12 17 1  
18 12 35 Wk  
19 14 15 Ar  
20 14 16 Ar  
21 17 18 1  
22 17 19 1  
23 17 20 1  
24 21 22 Ar  
25 21 23 Ar  
26 21 26 1  
27 22 24 Ar  
28 22 25 1  
29 23 27 Ar  
30 23 28 1  
31 24 29 Ar  
32 24 30 1  
33 26 31 1  
34 26 34 Ar  
35 27 29 Ar  
36 27 32 1  
37 29 33 1  
38 34 35 2

## TS-1'

@<TRIPOS>MOLECULE

36 38

SMALL

NO\_CHARGES

@<TRIPOS>ATOM

|        |         |         |         |   |
|--------|---------|---------|---------|---|
| 1 C1   | 0.1519  | 0.5779  | 0.7236  | C |
| 2 C2   | -1.2716 | -0.3034 | -0.9733 | C |
| 3 C3   | 2.5856  | -0.3659 | 0.3146  | C |
| 4 C4   | 3.5608  | -0.5269 | 1.3189  | C |
| 5 C5   | 3.0194  | -0.2448 | -1.0178 | C |
| 6 C6   | 4.9223  | -0.5244 | 1.0106  | C |
| 7 H7   | 3.2458  | -0.6475 | 2.3524  | H |
| 8 C8   | 1.1598  | -0.4199 | 0.7509  | C |
| 9 C9   | 4.3815  | -0.2567 | -1.3273 | C |
| 10 H10 | 2.2951  | -0.1461 | -1.8161 | H |
| 11 C11 | 5.3389  | -0.3877 | -0.3171 | C |
| 12 H12 | 5.6544  | -0.6364 | 1.8057  | H |
| 13 H13 | 1.0480  | -1.0452 | 1.6344  | H |
| 14 H14 | 4.6932  | -0.1644 | -2.3642 | H |
| 15 H15 | 6.3972  | -0.3923 | -0.5627 | H |
| 16 N16 | 0.4749  | -1.8574 | -0.5281 | N |
| 17 N17 | -0.4972 | -1.4090 | -1.0049 | N |
| 18 H18 | -1.0192 | 0.3954  | -1.7702 | H |
| 19 C19 | -2.6711 | -0.3864 | -0.5591 | C |
| 20 C20 | -3.5182 | 0.6981  | -0.8595 | C |
| 21 C21 | -3.1829 | -1.4741 | 0.1765  | C |
| 22 C22 | -4.8429 | 0.7002  | -0.4227 | C |
| 23 H23 | -3.1324 | 1.5362  | -1.4337 | H |
| 24 C24 | -4.5107 | -1.4706 | 0.5985  | C |

25 H25 -2.5485 -2.3264 0.4034 H  
26 C26 -5.3441 -0.3835 0.3056 C  
27 H27 -5.4848 1.5441 -0.6582 H  
28 H28 -4.8987 -2.3183 1.1559 H  
29 H29 -6.3782 -0.3859 0.6374 H  
30 N30 0.3632 1.8068 -0.0033 N  
31 O31 1.0202 1.7917 -1.0602 O  
32 O32 -0.1471 2.8481 0.4505 O  
33 C33 -0.7998 0.6926 1.8880 C  
34 H34 -1.7339 1.1863 1.6159 H  
35 H35 -1.0329 -0.3089 2.2599 H  
36 H36 -0.3492 1.2613 2.7106 H

@<TRIPOS>BOND

1 1 8 Ar  
2 1 30 1  
3 1 33 1  
4 1 2 Wk  
5 2 17 Ar  
6 2 18 1  
7 2 19 1  
8 3 4 Ar  
9 3 5 Ar  
10 3 8 1  
11 4 6 Ar  
12 4 7 1  
13 5 9 Ar  
14 5 10 1  
15 6 11 Ar  
16 6 12 1  
17 8 13 1  
18 8 16 Wk  
19 9 11 Ar  
20 9 14 1  
21 11 15 1  
22 16 17 2  
23 19 20 Ar  
24 19 21 Ar  
25 20 22 Ar  
26 20 23 1  
27 21 24 Ar  
28 21 25 1  
29 22 26 Ar  
30 22 27 1  
31 24 26 Ar  
32 24 28 1  
33 26 29 1  
34 30 31 Ar  
35 30 32 Ar  
36 33 34 1  
37 33 35 1  
38 33 36 1

### PS-1 (8a).

@<TRIPOS>MOLECULE

32 34

SMALL

NO\_CHARGES

@<TRIPOS>ATOM

1 C1 2.7777 -2.8764 0.2604 C  
2 C2 3.1791 -1.9363 -0.6932 C  
3 C3 2.5221 -0.7059 -0.7893 C  
4 C4 1.4543 -0.3865 0.0698 C  
5 C5 1.0645 -1.3416 1.0281 C  
6 C6 1.7162 -2.5731 1.1200 C  
7 H7 3.2864 -3.8335 0.3346 H  
8 H8 4.0004 -2.1611 -1.3685 H  
9 H9 0.2500 -1.1131 1.7090 H  
10 H10 1.3982 -3.2938 1.8687 H

|        |         |         |         |   |
|--------|---------|---------|---------|---|
| 11 C11 | 0.7764  | 0.9263  | -0.0133 | C |
| 12 C12 | 1.4020  | 2.1755  | 0.0048  | C |
| 13 C13 | 2.8402  | 2.5786  | 0.0689  | C |
| 14 H14 | 3.2680  | 2.7152  | -0.9315 | H |
| 15 H15 | 2.9547  | 3.5225  | 0.6119  | H |
| 16 H16 | 3.4311  | 1.8153  | 0.5818  | H |
| 17 C17 | -1.7877 | 0.3093  | -0.1043 | C |
| 18 C18 | -2.9657 | 0.6265  | 0.5966  | C |
| 19 C19 | -1.7571 | -0.8717 | -0.8667 | C |
| 20 C20 | -4.0792 | -0.2143 | 0.5382  | C |
| 21 H21 | -3.0009 | 1.5340  | 1.1916  | H |
| 22 C22 | -0.6249 | 1.2229  | -0.0508 | C |
| 23 C23 | -2.8709 | -1.7129 | -0.9222 | C |
| 24 H24 | -0.8650 | -1.1275 | -1.4289 | H |
| 25 C25 | -4.0357 | -1.3898 | -0.2188 | C |
| 26 H26 | -4.9787 | 0.0461  | 1.0896  | H |
| 27 H27 | -2.8290 | -2.6191 | -1.5204 | H |
| 28 H28 | -4.9005 | -2.0462 | -0.2613 | H |
| 29 N29 | -0.8328 | 2.5471  | -0.0535 | N |
| 30 N30 | 0.4020  | 3.0915  | -0.0162 | N |
| 31 H31 | 2.8311  | 0.0082  | -1.5474 | H |
| 32 H32 | 0.5014  | 4.0987  | -0.0094 | H |

@<TRIPOS>BOND

1 1 2 Ar  
2 1 6 Ar  
3 1 7 1  
4 2 3 Ar  
5 2 8 1  
6 3 4 Ar  
7 3 31 1  
8 4 5 Ar  
9 4 11 1  
10 5 6 Ar  
11 5 9 1  
12 6 10 1  
13 11 12 Ar  
14 11 22 1  
15 12 13 1  
16 12 30 Ar  
17 13 14 1  
18 13 15 1  
19 13 16 1  
20 17 18 Ar  
21 17 19 Ar  
22 17 22 1  
23 18 20 Ar  
24 18 21 1  
25 19 23 Ar  
26 19 24 1  
27 20 25 Ar  
28 20 26 1  
29 22 29 Ar  
30 23 25 Ar  
31 23 27 1  
32 25 28 1  
33 29 30 Ar  
34 30 32 1

## PS-1'

@<TRIPOS>MOLECULE

32 34  
SMALL  
NO\_CHARGES

@<TRIPOS>ATOM

|      |         |         |         |   |
|------|---------|---------|---------|---|
| 1 C1 | 0.0092  | 0.4407  | -0.0319 | C |
| 2 C2 | 1.1186  | -0.4539 | 0.0026  | C |
| 3 C3 | -2.5600 | -0.1225 | -0.0204 | C |
| 4 C4 | -3.0969 | 0.9930  | -0.6902 | C |

5 C5 -3.4429 -0.9869 0.6574 C  
6 C6 -4.4720 1.2361 -0.6787 C  
7 H7 -2.4427 1.6620 -1.2380 H  
8 C8 -1.1140 -0.3946 -0.0293 C  
9 C9 -4.8173 -0.7444 0.6603 C  
10 H10 -3.0529 -1.8426 1.2019 H  
11 C11 -5.3385 0.3697 -0.0055 C  
12 H12 -4.8664 2.1013 -1.2044 H  
13 H13 -5.4799 -1.4214 1.1924 H  
14 H14 -6.4078 0.5610 0.0013 H  
15 N15 -0.6308 -1.6698 0.0028 N  
16 N16 0.7121 -1.7346 0.0119 N  
17 C17 2.5691 -0.1550 0.0192 C  
18 C18 3.1125 0.7847 0.9129 C  
19 C19 3.4393 -0.8383 -0.8491 C  
20 C20 4.4859 1.0420 0.9292 C  
21 H21 2.4618 1.2994 1.6135 H  
22 C22 4.8126 -0.5843 -0.8285 C  
23 H23 3.0320 -1.5671 -1.5434 H  
24 C24 5.3409 0.3602 0.0576 C  
25 H25 4.8882 1.7681 1.6304 H  
26 H26 5.4690 -1.1209 -1.5083 H  
27 H27 6.4087 0.5604 0.0714 H  
28 C28 0.0320 1.9416 -0.0969 C  
29 H29 1.0127 2.3347 0.1771 H  
30 H30 -0.1889 2.3081 -1.1071 H  
31 H31 -0.7063 2.3863 0.5792 H  
32 H32 -1.1676 -2.5270 -0.0203 H

@<TRIPOS>BOND

1 1 2 Ar  
2 1 8 Ar  
3 1 28 1  
4 2 16 Ar  
5 2 17 1  
6 3 4 Ar  
7 3 5 Ar  
8 3 8 1  
9 4 6 Ar  
10 4 7 1  
11 5 9 Ar  
12 5 10 1  
13 6 11 Ar  
14 6 12 1  
15 8 15 Ar  
16 9 11 Ar  
17 9 13 1  
18 11 14 1  
19 15 16 1  
20 15 32 1  
21 17 18 Ar  
22 17 19 Ar  
23 18 20 Ar  
24 18 21 1  
25 19 22 Ar  
26 19 23 1  
27 20 24 Ar  
28 20 25 1  
29 22 24 Ar  
30 22 26 1  
31 24 27 1  
32 28 29 1  
33 28 30 1  
34 28 31 1

**Table S2.** Calculated energy values.

| <b>Molecules</b>          | <b>G</b>    | <b>H</b>    | <b>E-opt</b> |
|---------------------------|-------------|-------------|--------------|
| Diazo Compound            | -379.751428 | -379.710897 | -379.833602  |
| Nitroalkene ( <b>6a</b> ) | -553.394375 | -553.345723 | -553.521571  |
| TS-1                      | -933.093703 | -933.026443 | -933.325866  |
| TS-1'                     | -933.082648 | -933.015308 | -933.314513  |
| PS-1 ( <b>8a</b> )        | -727.488152 | -727.430168 | -727.706292  |
| PS-1'                     | -727.486576 | -727.428357 | -727.704591  |

Values shown at Hartree at 298.15 K

## Intrinsic Reaction Coordinate (IRC) of Transition States.

---

---

### IRC TS-1.

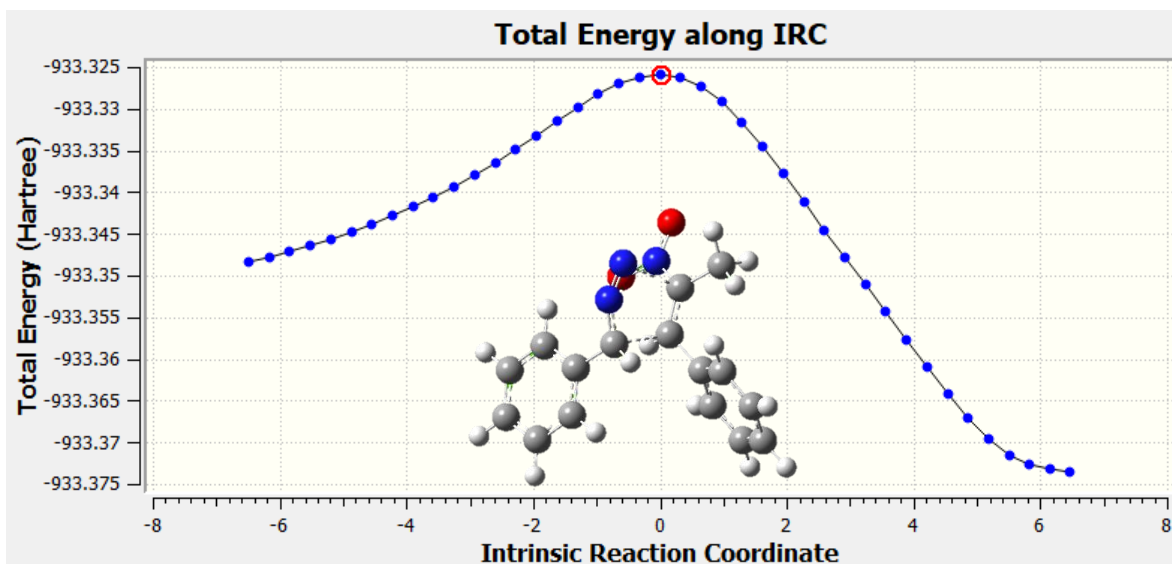

Negative frequency magnitude: -409.46

### IRC TS-1'.

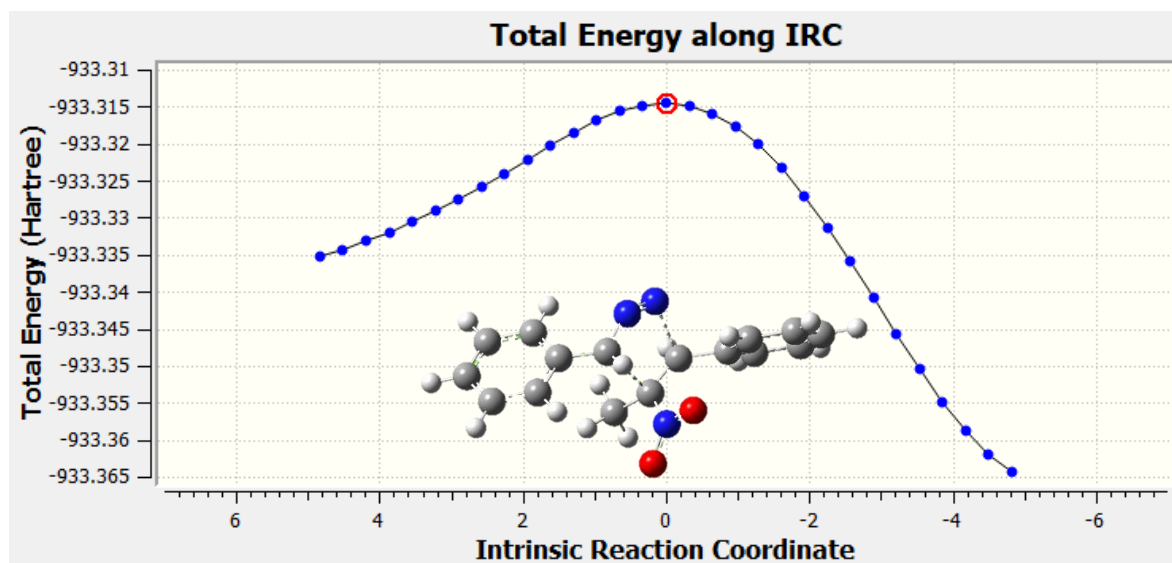

Negative frequency magnitude: -405.71



## Results of Cytotoxicity screening.

---

---

**Table S3.** Cytotoxicity activity of pyrazoles in different cell lines.

| Compound | % growth inhibition by cell line <sup>a</sup> |                     |                    |                    |
|----------|-----------------------------------------------|---------------------|--------------------|--------------------|
|          | PC-3 <sup>b</sup>                             | HCT-15 <sup>c</sup> | MCF-7 <sup>d</sup> | COS-7 <sup>e</sup> |
| 8a       | 12.29                                         | 0.13                | 4.35               | NC <sup>f</sup>    |
| 8b       | 13.71                                         | 5.66                | 11.78              | 8.50               |
| 8c       | 18.22                                         | 10.92               | 9.90               | 16.20              |
| 8d       | NC                                            | 0.14                | 20.68              | 12.37              |
| 8e       | 24.21                                         | 29.69               | 30.23              | 32.80              |
| 8f       | 25.08                                         | NC                  | 6.09               | 2.55               |
| 8g       | 11.94                                         | 1.86                | NC                 | 1.17               |
| 8h       | 11.72                                         | 8.22                | 45.56              | 28.46              |
| 8i       | 36.34                                         | 27.27               | 26.38              | 18.50              |
| 8j       | 4.04                                          | 8.08                | 35.47              | 31.39              |
| 8k       | 28.59                                         | 12.91               | 15.52              | 30.07              |
| 8l       | 7.06                                          | NC                  | 21.93              | 15.80              |
| 8m       | 14.41                                         | 2.50                | 2.90               | 4.40               |
| 8n       | 6.57                                          | NC                  | NC                 | NC                 |
| 8o       | 27.07                                         | 21.88               | 36.78              | 42.52              |
| 8p       | 8.98                                          | 7.29                | 34.90              | 34.33              |
| 8q       | 11.54                                         | 9.97                | 35.82              | 23.37              |
| 8r       | 4.84                                          | 5.12                | 27.68              | 12.92              |
| 8s       | 23.37                                         | 10.74               | NC                 | 16.83              |
| 8t       | 5.29                                          | 16.03               | 1.45               | NC                 |
| 8u       | 8.83                                          | 3.61                | NC                 | NC                 |
| 8v       | 18.91                                         | 21.14               | 20.14              | 7.42               |
| 8w       | 5.88                                          | NC                  | 9.81               | 4.85               |
| 8x       | 17.74                                         | 1.14                | 22.28              | 6.94               |
| 8y       | 6.82                                          | 0.40                | NC                 | NC                 |
| 8aa      | 10.68                                         | 2.73                | 5.90               | 7.26               |
| 8ab      | 6.42                                          | NC                  | 0.32               | 3.19               |
| 8ac      | 15.69                                         | 10.09               | 10.63              | 10.61              |

a) Concentration: 25  $\mu$ M; Vehicle: DMSO. b) Prostate cancer. c) Colon cancer. d) Breast cancer. e) Monkey's kidney cell line (not cancerous). f) Non-cytotoxic.
